# Supplementary material for: A Systematic Review on the Clinical Pharmacokinetics of Cephalexin in Healthy and Diseased Populations
Source: MDPI journal article supplement (doi:10.3390/antibiotics12091402), 2023-09-03
Supplement: s1 [file s1]

## Supplementary Information

# A Systematic Review on the Clinical Pharmacokinetics of Cephalexin in Healthy and Diseased Populations

Mohammed Kanan <sup>1,\*</sup>, Shahd Atif <sup>2</sup>, Faisal Mohammed <sup>3</sup>, Yara Balahmar <sup>4</sup>, Yasir Adawi <sup>5</sup>, Revan AlSaleem <sup>6</sup>, Ahmed Farhan <sup>7</sup>, Manayer Alghoribi <sup>8</sup>, Saud Mohammed <sup>6</sup>, Raghad Alshanbari <sup>9</sup>, Malak Fahad <sup>10</sup>, Rana Kallab <sup>11</sup>, Reem Mohammed <sup>6</sup>, Dimah Alassaf <sup>12</sup> and Ashwag Hazza <sup>13</sup>

<sup>1</sup> Department of Clinical Pharmacy, King Fahad Medical City, Riyadh 12211, Saudi Arabia

<sup>2</sup> Al Iman General Hospital, Riyadh 12211, Saudi Arabia; shahad.atif1@gmail.com

<sup>3</sup> Department of Clinical Pharmacy, College of Pharmacy, Umm Al-Qura University, Makkah 24211, Saudi Arabia; faisalpo1029@gmail.com

<sup>4</sup> Department of Clinical Pharmacy, College of Pharmacy, Ibn Sina College, Jeddah, Saudi Arabia; yarabalahmar@hotmail.com

<sup>5</sup> Department of Clinical Pharmacy, Jazan University, Jazan 85534, Saudi Arabia; yasir50adawi@gmail.com

<sup>6</sup> College of Pharmacy, King Khalid University, Abha 61421, Saudi Arabia; refanq21@gmail.com (R.A.) sauod1128@gmail.com (S.M.); reemalshehri.m@gmail.com (R.M.)

<sup>7</sup> Department of Pharmacy, Prince Sultan Military Medical City, Riyadh 12211, Saudi Arabia; ahmedaldafiri9@gmail.com

<sup>8</sup> Al-Nahda General Hospital, Private Healthcare Sector, Taif City 26575, Saudi Arabia; manayer.g@hotmail.com

<sup>9</sup> Department of Pharmacy, Erfan and Bagedo General Hospital, Jeddah 22230, Saudi Arabia; alshanbariraghad.1996@gmail.com AlshanbariRaghad.1996@gmail.com

<sup>10</sup> Department of Clinical Pharmacy, Northern Borders University, Rafha 91911, Saudi Arabia; malak.fahad.f@gmail.com

<sup>11</sup> Department of Pharmacy, Aldawaa Pharmacy, Arar 73551, Saudi Arabia; ranakallab@hotmail.com

<sup>12</sup> College of Medicine, Princess Noura University, Riyadh 12211, Saudi Arabia; dimaallassaff@gmail.com

<sup>13</sup> Department of Pharmacy, Altaawin Medical Clinics, Alkharij 16443, Saudi Arabia; ashwag.alsubaie0@gmail.com

\* Correspondence: ii\_kanan101@outlook.com

**Supplementary Table S1: Screening of articles based on title, abstract, presence of animals and language**

| Sr. No. | Title of Article                                                                                                                                                                                                                                                         | Exclusion basis |
|---------|--------------------------------------------------------------------------------------------------------------------------------------------------------------------------------------------------------------------------------------------------------------------------|-----------------|
| 1       | (1971). "Cephalexin (Keflex)." Med Lett Drugs Ther 13(7): 25-26.                                                                                                                                                                                                         | Abstract        |
| 2       | (1991). "Swedish Study Group. A randomized multicenter trial to compare the influence of cefaclor and amoxycillin on the colonization resistance of the digestive tract in patients with lower respiratory tract infection." Infection 19(4): 208-215.                   | Title           |
| 3       | (2000). "Antimicrobial treatment guidelines for acute bacterial rhinosinusitis: Sinus and Allergy Health Partnership *." Otolaryngology - Head and Neck Surgery 123(1, Part 2): S4-S31.                                                                                  | Title           |
| 4       | (2001). "Antimicrobial treatment guidelines for acute bacterial rhinosinusitis." Disease-a-Month 47(11): 537-585.                                                                                                                                                        | Title           |
| 5       | (2004). Chapter 4 Mechanisms of immunotoxic effects. Immunotoxicology of Drugs and Chemicals: an Experimental and Clinical Approach. J. Descotes, Elsevier. 1: 127-162.                                                                                                  | Title           |
| 6       | (2010). Oral Drug Absorption: Prediction And Assessment                                                                                                                                                                                                                  | Title           |
| 7       | (2012). "APhA2012 abstracts of contributed papers." Journal of the American Pharmacists Association 52(2): 200-284.                                                                                                                                                      | Title           |
| 8       | (2021). "Abstracts from the North American Neuromodulation Society's 2021 Virtual Meeting, January 15–16, 2021." Neuromodulation: Technology at the Neural Interface 24(4): e1-e276.                                                                                     | Title           |
| 9       | Abduljalil, K. M. A. (2010). Advanced population pharmacokinetic modelling to quantify selected characteristics of drugs, Universitäts- und Landesbibliothek Bonn.                                                                                                       | Title           |
| 10      | Abdulwahab, H. G., et al. (2020). "Novel thiobarbiturates as potent urease inhibitors with potential antibacterial activity: Design, synthesis, radiolabeling and biodistribution study." Bioorg Med Chem 28(23): 115759.                                                | Title           |
| 11      | Actor, P., et al. (1976). "Cefatrizine (SK&F 60771), a new oral cephalosporin: serum levels and urinary recovery in humans after oral or intramuscular administration; comparative study with cephalexin and cefazolin." Antimicrobagents chemother 9(5): 800-803.       | Abstract        |
| 12      | Adam, D., et al. (1978). "Interference of the tissue concentration of antibiotics with a salidiuretic. Behaviour of cephradine and cephalothin in brain tissue after additional administration of furosemide (author's transl)." Klinische Wochenschrift 56(5): 247-251. | Title           |
| 13      | Agatonovic-Kustrin, S., et al. (2002). "Molecular descriptors that influence the amount of drugs transfer into human breast milk." J Pharm Biomed Anal 29(1): 103-119.                                                                                                   | Title           |

|    |                                                                                                                                                                                                                                                                                                                                                      |          |
|----|------------------------------------------------------------------------------------------------------------------------------------------------------------------------------------------------------------------------------------------------------------------------------------------------------------------------------------------------------|----------|
| 14 | Agoram, B., et al. (2001). "Predicting the impact of physiological and biochemical processes on oral drug bioavailability." <i>Advanced Drug Delivery Reviews</i> 50: S41-S67.                                                                                                                                                                       | Title    |
| 15 | Ahmadi, S., et al. (2016). "Comparison of single dose of cefazolin versus single dose of cefazolin plus seven days cephalixin prophylactic therapy in postoperative infections after elective cesarean section and immediate adverse effect of antibiotic on infants." <i>Iranian journal of obstetrics, gynecology and infertility</i> 19(15): 1-7. | Abstract |
| 16 | Ahrens, T. and K. G. Naber (1983). "Activity of cefroxadine and cephalixin in urinary tract infections: a double-blind comparative study." <i>Infection</i> 11(1): 25-30.                                                                                                                                                                            | Abstract |
| 17 | Akimoto, Y., et al. (1998). "Cefaclor concentration in radicular granuloma after a single oral administration." <i>Gen Pharmacol</i> 31(2): 283-285.                                                                                                                                                                                                 | Title    |
| 18 | Akimoto, Y., et al. (1994). "Cefadroxil concentrations in human serum, gingiva, and mandibular bone following a single oral administration." <i>J Oral Maxillofac Surg</i> 52(4): 397-400; discussion 400-391.                                                                                                                                       | Title    |
| 19 | Akimoto, Y., et al. (1992). "Cefaclor concentrations in human serum, gingiva, mandibular bone, and dental follicle following a single oral administration." <i>Gen Pharmacol</i> 23(4): 639-642.                                                                                                                                                     | Title    |
| 20 | Akimoto, Y., et al. (1996). "Cefaclor concentration in pus from abscess caused by odontogenic infection after a single oral administration." <i>Gen Pharmacol</i> 27(1): 177-179.                                                                                                                                                                    | Title    |
| 21 | Ali, I., et al. (2023). "Advancement in oral pharmacokinetics of an antibiotic Cefixime using amphiphilic 4-armed macrocyclic surfactant based niosomes." <i>Arabian Journal of Chemistry</i> 16(8): 104958.                                                                                                                                         | Title    |
| 22 | Allen, J. G. and L. J. Lees (1980). "Pharmacokinetics of alafosfalin, alone and in combination with cephalixin, in humans." <i>Antimicrob Agents Chemother</i> 17(6): 973-979.                                                                                                                                                                       | Abstract |
| 23 | Altergott, C., et al. (2008). "Pediatric fingertip injuries: do prophylactic antibiotics alter infection rates?" <i>Pediatric emergency care</i> 24(3): 148-152.                                                                                                                                                                                     | Title    |
| 24 | Aman, S. F., et al. (2010). "Studies of food drug interactions." <i>Pak J Pharm Sci</i> 23.                                                                                                                                                                                                                                                          | Title    |
| 25 | Amidon, G. L., et al. (1988). "Estimating human oral fraction dose absorbed: a correlation using rat intestinal membrane permeability for passive and carrier-mediated compounds." <i>Pharm Res</i> 5(10): 651-654.                                                                                                                                  | Animal   |
| 26 | Anand, B. S., et al. (2004). "Pharmacokinetics of novel dipeptide ester prodrugs of acyclovir after oral administration: intestinal absorption and liver metabolism." <i>Journal of Pharmacology Experimental Therapeutics</i> 311(2): 659-667.                                                                                                      | Title    |

|    |                                                                                                                                                                                                                                                                        |          |
|----|------------------------------------------------------------------------------------------------------------------------------------------------------------------------------------------------------------------------------------------------------------------------|----------|
| 27 | Anand, B. S., et al. (2003). "Interactions of the dipeptide ester prodrugs of acyclovir with the intestinal oligopeptide transporter: competitive inhibition of glycylsarcosine transport in human intestinal cell line-Caco-2." J Pharmacol Exp Ther 304(2): 781-791. | Title    |
| 28 | Andersson, K. E. (1978). "On the pharmacokinetics of cephalosporin antibiotics." Scand J Infect Dis Suppl(13): 37-46.                                                                                                                                                  | Abstract |
| 29 | Andreas, C. J., et al. (2017). "Mechanistic investigation of the negative food effect of modified release zolpidem." European Journal of Pharmaceutical Sciences 102: 284-298.                                                                                         | Title    |
| 30 | Andriole, V. T. (1978). "Pharmacokinetics of cephalosporins in patients with normal or reduced renal function." J Infect Dis 137 Suppl: S88-s99.                                                                                                                       | Abstract |
| 31 | Arakawa, H., et al. (2016). "Possible interaction of quinolone antibiotics with peptide transporter 1 in oral absorption of peptide-mimetic drugs." Biopharm Drug Dispos 37(1): 39-45.                                                                                 | Title    |
| 32 | Arakawa, H., et al. (2014). "Evaluation of a thiodipeptide, L-phenylalanyl-Ψ[CS-N]-L-alanine, as a novel probe for peptide transporter 1." Drug Metab Pharmacokinet 29(6): 470-474.                                                                                    | Title    |
| 33 | Arakawa, S., et al. (1990). "A double-blind comparative study of S 6472 (a long-acting cefaclor) versus a conventional cefaclor preparation in complicated urinary tract infections." Japanese journal of antibiotics 43(11): 1873-1892.                               | Title    |
| 34 | Arguello, F., et al. (1998). "Flavopiridol Induces Apoptosis of Normal Lymphoid Cells, Causes Immunosuppression, and Has Potent Antitumor Activity In Vivo Against Human Leukemia and Lymphoma Xenografts." Blood 91(7): 2482-2490.                                    | Title    |
| 35 | Avery, R. K. (2010). "Infectious Disease Following Kidney Transplant: Core Curriculum 2010." American Journal of Kidney Diseases 55(4): 755-771.                                                                                                                       | Title    |
| 36 | Baba, S., et al. (1983). "The double-blind trial of cefroxadine and cephalexin in the treatment of acute suppurative otitis media and acute exacerbation of chronic suppurative otitis media." Japanese journal of antibiotics 36(9): 2595-2634.                       | Abstract |
| 37 | Bachmann, K., et al. (1986). "Impact of cefaclor on the pharmacokinetics of theophylline." Ther Drug Monit 8(2): 151-154.                                                                                                                                              | Title    |
| 38 | Badenoch, P. R., et al. (1986). "Effect of inflammation on antibiotic penetration into the anterior segment of the rat eye." Invest Ophthalmol Vis Sci 27(6): 958-965.                                                                                                 | Animal   |
| 39 | Badhan, R. K. S., et al. (2014). "Development of a physiologically-based pharmacokinetic model of the rat central nervous system." Pharmaceutics 6(1): 97-136.                                                                                                         | Animal   |
| 40 | Bailey, A., et al. (1970). "Cephalexin--a new oral antibiotic." Practitioner 205(230): 791-795.                                                                                                                                                                        | Abstract |

|    |                                                                                                                                                                                                                 |          |
|----|-----------------------------------------------------------------------------------------------------------------------------------------------------------------------------------------------------------------|----------|
| 41 | Ball, P., et al. (2004). "Safety profile of oral and intravenous moxifloxacin: Cumulative data from clinical trials and postmarketing studies." Clin Ther 26(7): 940-950.                                       | Title    |
| 42 | Ballantyne, F. N. (1985). "Comparative efficacy of cefadroxil and cefaclor in the treatment of skin and soft-tissue infections." Clin Ther 7(4): 487-491.                                                       | Title    |
| 43 | Bamfo, N. O., et al. (2021). "Examination of urinary excretion of unchanged drug in humans and preclinical animal models: increasing the predictability of poor metabolism in humans." Pharm Res 38: 1139-1156. | Title    |
| 44 | Bandak, S. I., et al. (1999). "Cefaclor af versus amoxycillin/clavulanate in acute bacterial exacerbations of chronic bronchitis: a randomised multicentre study." Int J Clin Pract 53(8): 578-583.             | Title    |
| 45 | Barberán, J., et al. (2007). "Update on osteo-articular infections and severe skin and soft tissue infections." Enfermedades Infecciosas y Microbiología Clínica 25: 28-36.                                     | Title    |
| 46 | Barbhaiya, R. H., et al. (1990). "Comparison of the effects of food on the pharmacokinetics of cefprozil and cefaclor." Antimicrob Agents Chemother 34(6): 1210-1213.                                           | Title    |
| 47 | Barbhaiya, R. H., et al. (1990). "Phase I study of multiple-dose cefprozil and comparison with cefaclor." Antimicrob Agents Chemother 34(6): 1198-1203.                                                         | Title    |
| 48 | Barbhaiya, R. H., et al. (1990). "Comparison of cefprozil and cefaclor pharmacokinetics and tissue penetration." Antimicrob Agents Chemother 34(6): 1204-1209.                                                  | Title    |
| 49 | Barkworth, M. F., et al. (1991). "[The biological availability of cefadroxil given simultaneously with N-acetylcysteine]." Arzneimittelforschung 41(8): 839-843.                                                | Title    |
| 50 | Barreca, T., et al. (1984). "Therapeutic experience with cofosfolactamines: clinical and bacteriological results of two multicentre double-blind studies." Drugs Exp Clin Res 10(1): 55-62.                     | Title    |
| 51 | Barrios, S., et al. (1975). "Bioavailability of cephalixin after intramuscular injection of its lysine salt." J Pharm Pharmacol 27(9): 711-712.                                                                 | Abstract |
| 52 | Basha, M., et al. (2018). "A potential antibacterial wound dressing of cefadroxil chitosan nanoparticles in situ gel: Fabrication, in vitro optimization and in vivo evaluation." Int J Pharm 544(1): 129-140.  | Title    |
| 53 | Bathini, L., et al. (2019). "Clinical Outcomes of Failing to Dose-Reduce Cephalosporin Antibiotics in Older Adults with CKD." Clin J Am Soc Nephrol 14(2): 197-205.                                             | Title    |

|    |                                                                                                                                                                                           |          |
|----|-------------------------------------------------------------------------------------------------------------------------------------------------------------------------------------------|----------|
| 54 | Bauer, P. and A. Windorfer (1981). "[Cefadroxil - fewer single administrations in better bioavailability]." ZFA (Stuttgart) 57(31): 2174-2177.                                            | Title    |
| 55 | Bedenic, B., et al. (2006). "Urinary bactericidal activity of oral antibiotics against common urinary tract pathogens in an ex vivo model." Chemotherapy 52(6): 293-297.                  | Title    |
| 56 | Belousov, I., et al. (1998). "Selection of antibacterial therapy for treatment of infections in elderly patients." Antibiot Khimioter 43(10): 19-23.                                      | Title    |
| 57 | Bennett, P., et al. (1996). Monographs on individual drugs. Drugs and Human Lactation, Elsevier: 75-532.                                                                                  | Title    |
| 58 | Bennett, W. M., et al. (1983). "Drug Prescribing in Renal Failure: Dosing Guidelines for Adults." American Journal of Kidney Diseases 3(3): 155-193.                                      | Title    |
| 59 | Bergan, T. (1980). "Pharmacokinetics of a new cephalosporin, CGP 9000 (cefroxadine), in healthy volunteers." Chemotherapy 26(4): 225-230.                                                 | Title    |
| 60 | Bergan, T. (1987). "Pharmacokinetic properties of the cephalosporins." Drugs 34 Suppl 2: 89-104.                                                                                          | Abstract |
| 61 | Bergan, T., et al. (1983). "Relationship between pharmacokinetics and bioavailability of cefroxadine (CGP 9000) and renal function." Chemotherapy 29(3): 163-173.                         | Title    |
| 62 | Bergan, T., et al. (1970). "Human pharmacokinetics of cephalixin." Pharmacology 4(5): 264-272.                                                                                            | Abstract |
| 63 | Bergogne-Berezin, E., et al. (1978). "Pharmacokinetic study of beta-lactam antibiotics in bronchial secretions." Scand J Infect Dis Suppl(14): 267-272.                                   | Title    |
| 64 | Berlioz, F., et al. (2000). "Chronic nifedipine dosing enhances cephalixin bioavailability and intestinal absorption in conscious rats." Drug Metab Dispos 28(11): 1267-1269.             | Animal   |
| 65 | Berlioz, F., et al. (2000). "alpha(2)-adrenergic receptors stimulate oligopeptide transport in a human intestinal cell line." J Pharmacol Exp Ther 294(2): 466-472.                       | Title    |
| 66 | Bersani, C., et al. (1986). "[Pharmacokinetics of cofosfolactamines in subjects with impaired kidney function]." G Ital Chemioter 33(2-3): 121-128.                                       | Title    |
| 67 | Beumer, H. M. and J. Veldkamp (1982). "Oral cefaclor for treatment of bronchitis--a comparative double-blind study versus amoxycillin." Int J Clin Pharmacol Ther Toxicol 20(3): 113-117. | Title    |

|    |                                                                                                                                                                                                                                                                                            |          |
|----|--------------------------------------------------------------------------------------------------------------------------------------------------------------------------------------------------------------------------------------------------------------------------------------------|----------|
| 68 | Beyssac, E., et al. (1991). "Comparison of continuous, constant rate enteral tube feeding in supine patients to bolus food intake in ambulatory, healthy subjects regarding bioavailability of perorally administered cefroxadine." <i>Methods Find Exp Clin Pharmacol</i> 13(9): 637-642. | Title    |
| 69 | Beyssac, E., et al. (1991). "Peroral absorption of cefroxadine in patients within the first day after severe trauma: comparison to cefroxadine pharmacokinetics in fasted, healthy volunteers." <i>Methods Find Exp Clin Pharmacol</i> 13(8): 565-572.                                     | Title    |
| 70 | Bhavnani, S. M., et al. (2004). "Pharmacokinetics, safety, and tolerability of ascending single intravenous doses of oritavancin administered to healthy human subjects." <i>Diagnostic microbiology infectious disease</i> 50(2): 95-102.                                                 | Title    |
| 71 | Bhutani, U., et al. (2021). "Oral Drug Delivery: Conventional to Long Acting New-Age Designs." <i>European Journal of Pharmaceutics and Biopharmaceutics</i> 162: 23-42.                                                                                                                   | Title    |
| 72 | Billig, H., et al. (1990). "The disposition of valpromide in rats and the isolated perfused rat liver." <i>Drug metabolism disposition</i> 18(2): 238-244.                                                                                                                                 | Animal   |
| 73 | Bins, J. W. and H. Mattie (1988). "Saturation of the tubular excretion of beta-lactam antibiotics." <i>Br J Clin Pharmacol</i> 25(1): 41-50.                                                                                                                                               | Title    |
| 74 | Bjerre, C., et al. (1996). "Bioavailability of the sedative propiomazine after nasal administration in rats." <i>Int J Pharm</i> 144(2): 217-224.                                                                                                                                          | Animal   |
| 75 | Blondeau, J. M. (2000). "A review of clinical trials with fluoroquinolones with an emphasis on new agents." <i>Expert opinion on investigational drugs</i> 9(2): 383-413.                                                                                                                  | Title    |
| 76 | Blumer, J. L. (2005). "Evolution of a new drug formulation: the rationale for high-dose, short-course therapy with azithromycin." <i>Int J Antimicrob Agents</i> 26: S143-S147.                                                                                                            | Title    |
| 77 | Bolding, O. T. (1980). "Comparison of the efficacy and safety of cefadroxil and cephalixin in treating acute urinary tract infections in women." <i>Journal of international medical research</i> 8(Suppl. 1): 34-39.                                                                      | Abstract |
| 78 | Boobis, A. R. and P. J. Lewis (1983). "Pharmacokinetics in pregnancy." <i>Clinical Pharmacology in Obstetrics</i> .                                                                                                                                                                        | Title    |
| 79 | Boothman, R., et al. (1973). "Absorption and excretion of cephalixin by the newborn infant." <i>Arch Dis Child</i> 48(2): 147-150.                                                                                                                                                         | Abstract |
| 80 | Bottaro, G., et al. (2012). "5 days Cefaclor vs. 10 days amoxicillin/clavulanate in the treatment of childhood streptococcal pharyngitis. Data from a randomized clinical trial." <i>Minerva pediatrica</i> 64(3): 341-346.                                                                | Title    |
| 81 | Bottoni, P. and S. Caroli (2018). "Presence of residues and metabolites of pharmaceuticals in environmental compartments, food commodities and workplaces: A review spanning the three-year period 2014–2016." <i>Microchemical Journal</i> 136: 2-24.                                     | Title    |

|    |                                                                                                                                                                                                                                                                                           |          |
|----|-------------------------------------------------------------------------------------------------------------------------------------------------------------------------------------------------------------------------------------------------------------------------------------------|----------|
| 82 | Bourdet, D. L. (2005). Novel mechanisms in the intestinal absorption of hydrophilic cationic drugs, The University of North Carolina at Chapel Hill.                                                                                                                                      | Title    |
| 83 | Bouza, E. and A. Burillo (2010). "Oritavancin: a novel lipoglycopeptide active against Gram-positive pathogens including multiresistant strains." <i>Int J Antimicrob Agents</i> 36(5): 401-407.                                                                                          | Title    |
| 84 | Bradley, J. S. (2023). "What Is the Appropriate Dose, Route, and Duration of Antibiotic Therapy for Pediatric Acute Hematogenous Osteomyelitis (AHO)? I Wish I Knew." <i>J Pediatric Infect Dis Soc</i> 12(2): 61-63.                                                                     | Title    |
| 85 | Bradley, J. S., et al. (2019). "Safety and efficacy of oral and/or intravenous tedizolid phosphate (TZD) in adolescents with acute bacterial skin and skin structure tissue infections (ABSSSI)." <i>Open forum infectious diseases</i> 6: S230-S231.                                     | Title    |
| 86 | Bratlid, D. and T. Bergan (1976). "Displacement of albumin-bound antimicrobial agents by bilirubin." <i>Pharmacology</i> 14(5): 464-472.                                                                                                                                                  | Title    |
| 87 | Bretschneider, B., et al. (1999). "Intestinal transport of beta-lactam antibiotics: analysis of the affinity at the H <sup>+</sup> /peptide symporter (PEPT1), the uptake into Caco-2 cell monolayers and the transepithelial flux." <i>Pharm Res</i> 16(1): 55-61.                       | Title    |
| 88 | Brisson, A. M. and J. B. Fourtillan (1982). "Pharmacokinetic study of cefadroxil following single and repeated doses." <i>J Antimicrob Chemother</i> 10 Suppl B: 11-15.                                                                                                                   | Title    |
| 89 | Brockmann, W. and M. Badr (2010). "Chronic Kidney Disease: Pharmacological considerations for the dentist." <i>The Journal of the American Dental Association</i> 141(11): 1330-1339.                                                                                                     | Title    |
| 90 | Brogard, J. M. and F. Comte (1982). "Pharmacokinetics of the new cephalosporins." <i>Antibiot Chemother</i> (1971) 31: 145-210.                                                                                                                                                           | Abstract |
| 91 | Brogard, J. M., et al. (1978). "Pharmacokinetics of cephalosporin antibiotics." <i>Antibiot Chemother</i> (1971) 25: 123-162.                                                                                                                                                             | Abstract |
| 92 | Brogden, R. N., et al. (1982). "Trimethoprim: a review of its antibacterial activity, pharmacokinetics and therapeutic use in urinary tract infections." <i>Drugs</i> 23(6): 405-430.                                                                                                     | Title    |
| 93 | Brooks, S. and A. R. Dent (1984). "Comparison of bone levels after intramuscular administration of cephadrine ('Velosef') or flucloxacillin/ampicillin in hip replacement." <i>Pharmatherapeutica</i> 3(10): 642-649.                                                                     | Title    |
| 94 | Brumfitt, W. and J. M. Hamilton-Miller (1999). "Cefaclor into the millennium." <i>J Chemother</i> 11(3): 163-178.                                                                                                                                                                         | Title    |
| 95 | Bucko, A. D., et al. (2002). "Randomized, double-blind, multicenter comparison of oral cefditoren 200 or 400 mg BID with either cefuroxime 250 mg BID or cefadroxil 500 mg BID for the treatment of uncomplicated skin and skin-structure infections." <i>Clin Ther</i> 24(7): 1134-1147. | Title    |



|     |                                                                                                                                                                                                                                                                                                                      |          |
|-----|----------------------------------------------------------------------------------------------------------------------------------------------------------------------------------------------------------------------------------------------------------------------------------------------------------------------|----------|
| 96  | Buckpitt, A. R. and M. R. Boyd (1980). "A sensitive method for determination of 5-fluorouracil and 5-fluoro-2'-deoxyuridine in human plasma by high-pressure liquid chromatography." <i>Analytical Biochemistry</i> 106(2): 432-437.                                                                                 | Title    |
| 97  | Bundgaard, H. and G. J. Friis (1992). "Prodrugs of peptides. 16. Isocyclosporin A as a potential prodrug of cyclosporin A." <i>Int J Pharm</i> 82(1): 85-90.                                                                                                                                                         | Title    |
| 98  | Bunke, C. M., et al. (1983). "Pharmacokinetics of common antibiotics used in continuous ambulatory peritoneal dialysis." <i>Am J Kidney Dis</i> 3(2): 114-117.                                                                                                                                                       | Title    |
| 99  | Bustrack, J. A., et al. (1980). "A comparative pharmacokinetic and safety study of an investigational oral cephalosporin, RMI 19,592." <i>Current therapeutic research - clinical and experimental</i> 28(2): 208-217.                                                                                               | Abstract |
| 100 | Butcher, R. H., et al. (1972). "Blood and urine levels of cephalexin in patients with impaired renal function." <i>Med J Aust</i> 2(23): 1282-1284.                                                                                                                                                                  | Abstract |
| 101 | Buur, A., et al. (1988). "Prodrugs of propranolol: hydrolysis and intramolecular aminolysis of various propranolol esters and an oxazolidin-2-one derivative." <i>Int J Pharm</i> 42(1): 51-60.                                                                                                                      | Title    |
| 102 | Byun, S.-Y., et al. (2016). "Pharmacokinetic study of meropenem in healthy beagle dogs receiving intermittent hemodialysis." <i>Journal of Veterinary Pharmacology Therapeutics</i> 39(6): 560-565.                                                                                                                  | Animal   |
| 103 | Cadorniga, R., et al. (1990). "Pharmacokinetics of cefroxadine after infusion to healthy volunteers." <i>Int J Clin Pharmacol Ther Toxicol</i> 28(10): 435-439.                                                                                                                                                      | Title    |
| 104 | Cain, T. J., et al. (1987). "Bone levels of cephradine and cefuroxime after intravenous administration in patients undergoing total hip replacement." <i>International orthopaedics</i> 11(1): 61-63.                                                                                                                | Title    |
| 105 | Campanacci, L., et al. (1975). "[Antibiotic therapy and renal insufficiency. Pharmacokinetics of pivampicillin, cephaloridin and streptomycin in chronic uremic patients undergoing conservative or hemodialytic treatment]." <i>Minerva Med</i> 66(68): 3547-3565.                                                  | Title    |
| 106 | Campbell, D. B. (1997). <i>Chirality and kinetics. Pharmacochemistry Library. F. Awouters and K. C. Waugh, Elsevier.</i> 28: 45-60.                                                                                                                                                                                  | Title    |
| 107 | Cappelletty, D. M. and M. J. Rybak (1996). "Bactericidal activities of cefprozil, penicillin, cefaclor, cefixime, and loracarbef against penicillin-susceptible and -resistant <i>Streptococcus pneumoniae</i> in an in vitro pharmacodynamic infection model." <i>Antimicrob Agents Chemother</i> 40(5): 1148-1152. | Title    |
| 108 | Caramatti, C., et al. (1980). "[Clinical evaluation of use of combinations of beta-lactamines in anti-infective therapy]." <i>Ateneo Parmense Acta Biomed</i> 51(1): 57-66.                                                                                                                                          | Title    |

|     |                                                                                                                                                                                                                                                                  |        |
|-----|------------------------------------------------------------------------------------------------------------------------------------------------------------------------------------------------------------------------------------------------------------------|--------|
| 109 | Carli, S., et al. (1999). "Absorption kinetics and bioavailability of cephalexin in the dog after oral and intramuscular administration." J Vet Pharmacol Ther 22(5): 308-313.                                                                                   | Animal |
| 110 | Carr, R. A. (1995). "Pharmacokinetics of Sotalol enantiomers." Clin Pharmacol.                                                                                                                                                                                   | Title  |
| 111 | Carsenti-Etesse, H., et al. (1998). "Pharmacokinetic parameters and killing rates in serum of volunteers receiving amoxicillin, cefadroxil or cefixime alone or associated with niflumic acid or paracetamol." Eur J Drug Metab Pharmacokinet 23(3): 357-366.    | Title  |
| 112 | Casewell, M. W. and S. G. Bragman (1987). "The in-vitro activity of cefadroxil, and the interpretation of disc-susceptibility testing." J Antimicrob Chemother 19(5): 597-603.                                                                                   | Title  |
| 113 | Castro, M. (1986). "A comparative study of cefadroxil and co-trimoxazole in patients with lower respiratory tract infections." Drugs 32 Suppl 3: 50-56.                                                                                                          | Title  |
| 114 | Cattrall, J. W. S., et al. (2019). "A pharmacokinetic-pharmacodynamic assessment of oral antibiotics for pyelonephritis." Eur J Clin Microbiol Infect Dis 38(12): 2311-2321.                                                                                     | Title  |
| 115 | Cayen, M. N. (1985). "Disposition, metabolism and pharmacokinetics of antihyperlipidemic agents in laboratory animals and man." Pharmacology & Therapeutics 29(2): 157-204.                                                                                      | Title  |
| 116 | Cazzola, M., et al. (2000). "Interrelationship between the pharmacokinetics and pharmacodynamics of cefaclor advanced formulation in patients with acute exacerbation of chronic bronchitis." J Chemother 12(3): 216-222.                                        | Title  |
| 117 | Chang, Q., et al. (2009). "Studies on the influence of esterase inhibitor to the pharmacokinetic profiles of oseltamivir and oseltamivir carboxylate in rats using an improved LC/MS/MS method." Biomed Chromatogr 23(8): 852-857.                               | Animal |
| 118 | Charles, B. and S. Chulavatnatol (1993). "Simple analysis of amoxycillin in plasma by high performance liquid chromatography with internal standardization and ultraviolet detection." Biomed Chromatogr 7(4): 204-207.                                          | Title  |
| 119 | Chavada, V. D., et al. (2020). "Citrate/melamine functionalized gold nanoparticles for concurrent determination of allopurinol and its major metabolite, oxypurinol in plasma and pharmaceuticals." Journal of Industrial and Engineering Chemistry 84: 141-149. | Title  |
| 120 | Chen, J., et al. (2012). "Bioequivalence studies of 2 oral cefaclor capsule formulations in chinese healthy subjects." Arzneimittelforschung 62(3): 134-137.                                                                                                     | Title  |
| 121 | Chen, L. and X. Chen (2012). "Results of molecular docking as descriptors to predict human serum albumin binding affinity." Journal of Molecular Graphics and Modelling 33: 35-43.                                                                               | Title  |

|     |                                                                                                                                                                                                                                                                                          |          |
|-----|------------------------------------------------------------------------------------------------------------------------------------------------------------------------------------------------------------------------------------------------------------------------------------------|----------|
| 122 | Chen, M. L. (1992). "An alternative approach for assessment of rate of absorption in bioequivalence studies." <i>Pharm Res</i> 9(11): 1380-1385.                                                                                                                                         | Title    |
| 123 | Chen, X. (2000). Pharmacokinetically guided chemotherapy for biliary tract infection, The Ohio State University.                                                                                                                                                                         | Title    |
| 124 | Chen, X. (2017). Influence of PEPT2 on the Regional Distribution Kinetics of Cefadroxil in Brain Using Intracerebral Microdialysis in Rats, Wildtype and PEPT2 Knockout mice.                                                                                                            | Animal   |
| 125 | Chen, X., et al. (2017). "Influence of peptide transporter 2 (PEPT2) on the distribution of cefadroxil in mouse brain: a microdialysis study." <i>Biochem Pharmacol</i> 131: 89-97.                                                                                                      | Animal   |
| 126 | Chen, X., et al. (2012). "Investigation of dried blood spot card-induced interferences in liquid chromatography/mass spectrometry." <i>J Pharm Biomed Anal</i> 61: 30-37.                                                                                                                | Title    |
| 127 | Chen, X., et al. (2003). "Determination of cefaclor in human plasma by a sensitive and specific liquid chromatographic-tandem mass spectrometric method." <i>J Chromatogr B Analyt Technol Biomed Life Sci</i> 784(1): 17-24.                                                            | Title    |
| 128 | Cheng, C.-L. and C.-H. Chou (2001). "Determination of metformin in human plasma by high-performance liquid chromatography with spectrophotometric detection." <i>Journal of Chromatography B: Biomedical Sciences and Applications</i> 762(1): 51-58.                                    | Title    |
| 129 | Chew, M. L., et al. (2008). "Anticholinergic activity of 107 medications commonly used by older adults." <i>J Am Geriatr Soc</i> 56(7): 1333-1341.                                                                                                                                       | Title    |
| 130 | Chi Chan, A., et al. (1999). "Efficacy and safety of cefalexin-bromhexin vs amoxicillin in acute bronchitis and chronic bronchitis acute exacerbations." <i>Investigacion medica internacional</i> 26(1): 19-24.                                                                         | Abstract |
| 131 | Chien, J. Naine: PPD.                                                                                                                                                                                                                                                                    | Title    |
| 132 | Chin, K. C., et al. (1981). "A pharmacological study of cefaclor in the newborn infant." <i>Curr Med Res Opin</i> 7(3): 168-170.                                                                                                                                                         | Title    |
| 133 | Chin, P. K. L., et al. (2023). "One giant leap for cephalexin dosing, one small step for antimicrobial stewardship." <i>Cjem</i> 25(1): 7-8.                                                                                                                                             | Abstract |
| 134 | Choi, S. J., et al. (2009). "Rapid and simple method for determination of cephradine in human plasma using liquid chromatography-tandem mass spectrometry (LC-MS/MS): application to the bioequivalence study." <i>J Chromatogr B Analyt Technol Biomed Life Sci</i> 877(31): 4059-4064. | Title    |
| 135 | Chougule, D. D. and N. S. Naikwade (2015). "Pharmacokinetic and bioequivalence evaluation of two generic brands of cephalexin: a single-dose, randomized, open-label, parallel study." <i>Latin american journal of pharmacy</i> 34(7): 1459-1463.                                       | Abstract |
| 136 | Chow, M., et al. (1979). "Pharmacokinetics of high-dose oral cephalosporins." <i>J Clin Pharmacol</i> 19(4): 185-194.                                                                                                                                                                    | Abstract |

|     |                                                                                                                                                                                                                                             |          |
|-----|---------------------------------------------------------------------------------------------------------------------------------------------------------------------------------------------------------------------------------------------|----------|
| 137 | Chowdhry, B. Z., et al. (1983). "Analysis of drugs by microcalorimetry: Isothermal power-conduction calorimetry and thermometric titrimetry." <i>Talanta</i> 30(4): 209-243.                                                                | Title    |
| 138 | Christenson, J. C., et al. (1991). "Comparative efficacy and safety of cefprozil and cefaclor in the treatment of acute uncomplicated urinary tract infections." <i>J Antimicrob Chemother</i> 28(4): 581-586.                              | Title    |
| 139 | Christenson, J. C., et al. (1991). "Comparative efficacy and safety of cefprozil (BMY-28100) and cefaclor in the treatment of acute group A beta-hemolytic streptococcal pharyngitis." <i>Antimicrob Agents Chemother</i> 35(6): 1127-1130. | Title    |
| 140 | Chu, X. Y., et al. (2001). "Correlation between epithelial cell permeability of cephalexin and expression of intestinal oligopeptide transporter." <i>J Pharmacol Exp Ther</i> 299(2): 575-582.                                             | Abstract |
| 141 | Cole, P. (1997). "Pharmacologic and clinical comparison of cefaclor in immediate-release capsule and extended-release tablet forms." <i>Clin Ther</i> 19(4): 617-625; discussion 603.                                                       | Title    |
| 142 | Condon, R. E. and D. H. Wittmann (1991). "The use of antibiotics in general surgery." <i>Current Problems in Surgery</i> 28(12): 807-907.                                                                                                   | Title    |
| 143 | Cooper, R. D. G. (1992). "The carbacephems: A new beta-lactam antibiotic class." <i>The American Journal of Medicine</i> 92(6, Supplement 1): S2-S6.                                                                                        | Title    |
| 144 | Corson, A. H., et al. (2016). "Why isn't cefadroxil used more often?" <i>Am J Health Syst Pharm</i> 73(11): 754-755.                                                                                                                        | Title    |
| 145 | Couet, W., et al. (1991). "Pharmacokinetics of oral cefatrizine in patients with impaired renal function." <i>Int J Clin Pharmacol Ther Toxicol</i> 29(6): 213-217.                                                                         | Title    |
| 146 | Couet, W., et al. (1988). "[Pharmacokinetics of cefatrizine administered in repeated doses]." <i>Pathol Biol (Paris)</i> 36(5): 513-516.                                                                                                    | Title    |
| 147 | Couet, W. R., et al. (1991). "Theoretical model for both saturable rate and extent of absorption: simulations of cefatrizine data." <i>J Pharmacokinet Biopharm</i> 19(3): 271-285.                                                         | Title    |
| 148 | Covitz, K. M., et al. (1996). "Human dipeptide transporter, hPEPT1, stably transfected into Chinese hamster ovary cells." <i>Pharm Res</i> 13(11): 1631-1634.                                                                               | Title    |
| 149 | Craft, J. C., et al. (1987). "Malabsorption of oral antibiotics in humans and rats with giardiasis." <i>Pediatr Infect Dis J</i> 6(9): 832-836.                                                                                             | Title    |
| 150 | Crandon, J. and D. P. Nicolau (2008). "Oritavancin: a potential weapon in the battle against serious Gram-positive pathogens." <i>Future Microbiol</i> 3(3): 251-263.                                                                       | Title    |
| 151 | Creasey, W. A., et al. (1984). "Pharmacokinetic interaction of aztreonam with other antibiotics." <i>J Clin Pharmacol</i> 24(4): 174-180.                                                                                                   | Title    |

|     |                                                                                                                                                                                                                                                                                   |           |
|-----|-----------------------------------------------------------------------------------------------------------------------------------------------------------------------------------------------------------------------------------------------------------------------------------|-----------|
| 152 | Crespi, C. L., et al. (1996). "Development of Caco-2 cells expressing high levels of cDNA-derived cytochrome P4503A4." <i>Pharm Res</i> 13(11): 1635-1641.                                                                                                                        | Title     |
| 153 | Crowe, H. M. and R. Quintiliani (1995). "Antibiotic formulary selection." <i>Medical Clinics of North America</i> 79(3): 463-476.                                                                                                                                                 | Title     |
| 154 | Cui, H., et al. (2016). "Development of a drug-in-adhesive patch combining ion pair and chemical enhancer strategy for transdermal delivery of zaltoprofen: pharmacokinetic, pharmacodynamic and in vitro/in vivo correlation evaluation." <i>Drug Delivery</i> 23(9): 3461-3470. | Title     |
| 155 | Cummings, D. M. and K. M. Uttech (1990). "Antibiotics for Common Infections in the Elderly." <i>Primary Care: Clinics in Office Practice</i> 17(4): 883-903.                                                                                                                      | Title     |
| 156 | Curtin, C. D., et al. (2003). "Efficacy of cephalexin two vs. three times daily vs. cefadroxil once daily for streptococcal tonsillopharyngitis." <i>Clinical pediatrics</i> 42(6): 519-526.                                                                                      | Full text |
| 157 | Cutler, R. (1980). "Cefadroxil kinetics in patients with impaired renal function." <i>J Int Med Res</i> 8(Suppl 1): 17-20.                                                                                                                                                        | Title     |
| 158 | Dagan, R., et al. (2000). "Bacteriologic efficacies of oral azithromycin and oral cefaclor in treatment of acute otitis media in infants and young children." <i>Antimicrob Agents Chemother</i> 44(1): 43-50.                                                                    | Title     |
| 159 | Dahlgren, D., et al. (2015). "Direct in vivo human intestinal permeability (Peff) determined with different clinical perfusion and intubation methods." <i>Journal of pharmaceutical sciences and research</i> 104(9): 2702-2726.                                                 | Title     |
| 160 | Dahlin, M. (2000). Nasal administration of compounds active in the central nervous system: exploring the olfactory system, <i>Acta Universitatis Upsaliensis</i> .                                                                                                                | Title     |
| 161 | Dallmann, A., et al. (2017). "Physiologically Based Pharmacokinetic Modeling of Renally Cleared Drugs in Pregnant Women." <i>Clin Pharmacokinet</i> 56(12): 1525-1541.                                                                                                            | Title     |
| 162 | Dantzig, A. H. and L. Bergin (1988). "Carrier-mediated uptake of cephalexin in human intestinal cells." <i>Biochem Biophys Res Commun</i> 155(2): 1082-1087.                                                                                                                      | Abstract  |
| 163 | Dantzig, A. H. and L. Bergin (1990). "Uptake of the cephalosporin, cephalexin, by a dipeptide transport carrier in the human intestinal cell line, Caco-2." <i>Biochim Biophys Acta</i> 1027(3): 211-217.                                                                         | Abstract  |
| 164 | Dantzig, A. H., et al. (1994). "Transport mechanisms responsible for the absorption of loracarbef, cefixime, and cefuroxime axetil into human intestinal Caco-2 cells." <i>Biochim Biophys Acta</i> 1191(1): 7-13.                                                                | Title     |

|     |                                                                                                                                                                                                                                                                                                                      |          |
|-----|----------------------------------------------------------------------------------------------------------------------------------------------------------------------------------------------------------------------------------------------------------------------------------------------------------------------|----------|
| 165 | Darmstadt, G. L. (1998). "ANTIBIOTICS IN THE MANAGEMENT OF PEDIATRIC SKIN DISEASE." <i>Dermatologic Clinics</i> 16(3): 509-525.                                                                                                                                                                                      | Title    |
| 166 | Davies, A. J., et al. (1986). "Comparative pharmacokinetics of cefamandole, cefuroxime and cephadrine during total hip replacement." <i>J Antimicrob Chemother</i> 17(5): 637-640.                                                                                                                                   | Title    |
| 167 | Davies, B. J., et al. (2006). "Determination of the 4-monohydroxy metabolites of perhexiline in human plasma, urine and liver microsomes by liquid chromatography." <i>Journal of Chromatography B</i> 843(2): 302-309.                                                                                              | Title    |
| 168 | Davies, J. A. and J. M. Holt (1975). "Absorption of cephalexin in diseased and aged subjects." <i>J Antimicrob Chemother</i> 1(3 Suppl): 69-70.                                                                                                                                                                      | Abstract |
| 169 | Davies, J. A., et al. (1970). "Absorption of cephalexin from the gastrointestinal tract in disease subjects." <i>Postgrad Med J: Suppl</i> :16-19.                                                                                                                                                                   | Abstract |
| 170 | Davis, C. M., et al. (2016). "Prevalence of Surgical Site Infections Following Orthognathic Surgery: a Double-Blind, Randomized Controlled Trial on a 3-Day Versus 1-Day Postoperative Antibiotic Regimen." <i>Journal of oral and maxillofacial surgery</i> . (no pagination), 2016 Date of Publication: August 07. | Title    |
| 171 | Davis, C. M., et al. (2017). "Prevalence of Surgical Site Infections Following Orthognathic Surgery: a Double-Blind, Randomized Controlled Trial on a 3-Day Versus 1-Day Postoperative Antibiotic Regimen." <i>Journal of oral and maxillofacial surgery</i> 75(4): 796-804.                                         | Title    |
| 172 | Davis, G. A. and M. H. H. Chandler (1996). "DRUG THERAPY AND DRUG INTERACTIONS." <i>Oral and Maxillofacial Surgery Clinics of North America</i> 8(2): 245-263.                                                                                                                                                       | Title    |
| 173 | Davis, J. L., et al. (2006). "Mucosal permeability of water-soluble drugs in the equine jejunum: a preliminary investigation." <i>J Vet Pharmacol Ther</i> 29(5): 379-385.                                                                                                                                           | Title    |
| 174 | Dawborn, J. K. (1974). "Renal failure and the action of drugs." <i>Prog Biochem Pharmacol</i> 9: 206-220.                                                                                                                                                                                                            | Title    |
| 175 | de Fijter, C. W., et al. (1989). "Are intracellularly penetrating antibiotics warranted in CAPD-related peritonitis?" <i>Adv Perit Dial</i> 5: 124-127.                                                                                                                                                              | Title    |
| 176 | de, I., et al. (2002). "Comparative target site pharmacokinetics of immediate- and modified-release formulations of cefaclor in humans." <i>J Clin Pharmacol</i> 42(4): 403-411.                                                                                                                                     | Title    |
| 177 | de la Peña, A., et al. (2004). "PK-PD modelling of the effect of cefaclor on four different bacterial strains." <i>Int J Antimicrob Agents</i> 23(3): 218-225.                                                                                                                                                       | Title    |

|     |                                                                                                                                                                                                                                                                                                                                    |           |
|-----|------------------------------------------------------------------------------------------------------------------------------------------------------------------------------------------------------------------------------------------------------------------------------------------------------------------------------------|-----------|
| 178 | De Maine, J. B. and W. M. Kirby (1970). "Clinical pharmacology of cephalixin administered intravenously." <i>Antimicrob Agents Chemother</i> (Bethesda) 10: 190-194.                                                                                                                                                               | Abstract  |
| 179 | de Vrueth, R. L., et al. (1998). "Transport of L-valine-acyclovir via the oligopeptide transporter in the human intestinal cell line, Caco-2." <i>J Pharmacol Exp Ther</i> 286(3): 1166-1170.                                                                                                                                      | Title     |
| 180 | Dean, R. A., et al. (1994). "Simultaneous determination of primaquine and carboxyprimaquine in plasma using high-performance liquid chromatography with electrochemical detection." <i>Journal of Chromatography B: Biomedical Sciences and Applications</i> 655(1): 89-96.                                                        | Title     |
| 181 | Dean, S., et al. (1979). "Absorption and excretion of cephalixin in health and acute illness." <i>Eur J Clin Pharmacol</i> 16(1): 73-74.                                                                                                                                                                                           | Abstract  |
| 182 | Dellamonica, P., et al. (1993). "Pharmacokinetic and bacteriological study of cefadroxil-salicylate and josamycin-salicylate drug regimens." <i>Int J Clin Pharmacol Res</i> 13(1): 11-20.                                                                                                                                         | Title     |
| 183 | Deppermann, K. M., et al. (1990). "Comparative pharmacokinetics of cefotiam hexetil (CEHX), cefuroxime axetil (CEFUR), Cefixime (CEFIX), Cephalixine (CEPHA), and the influence of a standard breakfast, ranitidine, and Maalox 70 on enteral absorption of cefotiam hexetil." <i>Klinische Wochenschrift</i> 68(Suppl 19): 48-49. | Abstract  |
| 184 | Deppermann, K. M., et al. (1989). "Influence of ranitidine, pirenzepine, and aluminum magnesium hydroxide on the bioavailability of various antibiotics, including amoxicillin, cephalixin, doxycycline, and amoxicillin-clavulanic acid." <i>Antimicrob Agents Chemother</i> 33(11): 1901-1907.                                   | Full text |
| 185 | Derendorf, H. and S. Schmidt (2019). "Rowland and Tozer's clinical pharmacokinetics and pharmacodynamics: concepts and applications."                                                                                                                                                                                              | Title     |
| 186 | Derrick, C. W., Jr. and K. Reilly (1983). "The role of cephalixin in the treatment of skin and soft-tissue infections." <i>Postgrad Med J</i> 59 Suppl 5: 43-46.                                                                                                                                                                   | Abstract  |
| 187 | Derry, J. E. (1981). "Evaluation of cefaclor." <i>Am J Hosp Pharm</i> 38(1): 54-58.                                                                                                                                                                                                                                                | Title     |
| 188 | Dey, N., et al. (2022). "Role of nanomaterials in deactivating multiple drug resistance efflux pumps – A review." <i>Environmental Research</i> 204: 111968.                                                                                                                                                                       | Title     |
| 189 | Dhopeshwarkar, V., et al. (1994). "Development of an oral sustained-release antibiotic matrix tablet using in-vitro/in-vivo correlations." <i>Drug Dev Ind Pharm</i> 20(11): 1851-1867.                                                                                                                                            | Title     |
| 190 | Dhuria, S. V., et al. (2009). "Intranasal drug targeting of hypocretin-1 (orexin-A) to the central nervous system." <i>J Pharm Sci</i> 98(7): 2501-2515.                                                                                                                                                                           | Title     |

|     |                                                                                                                                                                                                                             |          |
|-----|-----------------------------------------------------------------------------------------------------------------------------------------------------------------------------------------------------------------------------|----------|
| 191 | DiMattia, A. F., et al. (1981). "Efficacy of two dosage schedules of cephalexin in dermatologic infections." J Fam Pract 12(4): 649-652.                                                                                    | Abstract |
| 192 | Ding, H., et al. (2020). "Pharmacokinetic behavior of peramivir in the plasma and lungs of rats after trans-nasal aerosol inhalation and intravenous injection." 129: 110464.                                               | Animal   |
| 193 | Ding, Y., et al. (2013). "Effects of amlodipine on the oral bioavailability of cephalexin and cefuroxime axetil in healthy volunteers." J Clin Pharmacol 53(1): 82-86.                                                      | Abstract |
| 194 | DiPiro, J. T., et al. (1983). "The prophylactic use of antimicrobials in surgery." Current Problems in Surgery 20(2): 69-132.                                                                                               | Title    |
| 195 | Dorow, P. (1989). "Safety and efficacy of cefixime versus cefaclor in respiratory tract infections." J Chemother 1(4): 257-260.                                                                                             | Title    |
| 196 | Douglas, L. R., et al. (1998). "Oral management of the patient with end-stage liver disease and the liver transplant patient." Oral Surgery, Oral Medicine, Oral Pathology, Oral Radiology, and Endodontology 86(1): 55-64. | Title    |
| 197 | Dubbelboer, I. R., et al. (2019). "Rat intestinal drug permeability: A status report and summary of repeated determinations." European Journal of Pharmaceutics and Biopharmaceutics 142: 364-376.                          | Animal   |
| 198 | Dubinsky, S., et al. (2022). "Determining the Effects of Chronic Kidney Disease on Organic Anion Transporter1/3 Activity Through Physiologically Based Pharmacokinetic Modeling." 61(7): 997-1012.                          | Title    |
| 199 | Dudley, M. N., et al. (1990). "Significance of "extravascular" protein binding for antimicrobial pharmacodynamics in an in vitro capillary model of infection." Antimicrob Agents Chemother 34(1): 98-101.                  | Title    |
| 200 | Dvoráček, K., et al. (1976). "[A contribution on the pharmacokinetics of oral cephalosporin antibiotics (author's transl)]." Cas Lek Cesk 115(20-21): 622-627.                                                              | Abstract |
| 201 | Eichenwald, H. F. and H. J. Schmitt (1986). "The cephalosporin antibiotics in pediatric therapy." Eur J Pediatr 144(6): 532-538.                                                                                            | Title    |
| 202 | Elder, M. G., et al. (1977). "Pelvic tissue and serum concentrations of various antibiotics given as pre-operative medication." Br J Obstet Gynaecol 84(12): 887-893.                                                       | Title    |
| 203 | Ellison, M. J. and D. W. Crabtree (1990). "Antibiotic Therapy for Common Infections." Primary Care: Clinics in Office Practice 17(3): 521-541.                                                                              | Title    |
| 204 | Embil, J. M. and L. E. Nicolle (1999). "Antimicrobial Agents." Physical Medicine and Rehabilitation Clinics of North America 10(2): 403-436.                                                                                | Title    |
| 205 | Epling, D. (2019). Characterization of the Intestinal Permeability and Oral Absorption of Valacyclovir in Wildtype and huPepT1 Transgenic Mice.                                                                             | Animal   |



|     |                                                                                                                                                                                                                                         |          |
|-----|-----------------------------------------------------------------------------------------------------------------------------------------------------------------------------------------------------------------------------------------|----------|
| 206 | Epling, D., et al. (2018). "Evaluating the intestinal and oral absorption of the prodrug valacyclovir in wildtype and huPepT1 transgenic mice." <i>Biochem Pharmacol</i> 155: 1-7.                                                      | Animal   |
| 207 | Epstein, M. E., et al. (1997). "Antimicrobial agents for the dermatologist. I. $\beta$ -Lactam antibiotics and related compounds." <i>Journal of the American Academy of Dermatology</i> 37(2, Part 1): 149-165.                        | Title    |
| 208 | Fagerholm, U., et al. (2023). "Prediction of the Human Pharmacokinetics of 30 Modern Antibiotics Using the ANDROMEDA Software." <i>bioRxiv</i> : 2023.2003. 2028.534601.                                                                | Title    |
| 209 | Fazulbhoy, R., et al. (2021). "A Comparative Analysis of Amoxicillin and Cefuroxime." <i>International Journal of Scientific Research in Science and Technology</i> 8: 96-124.                                                          | Title    |
| 210 | Federspil, P., et al. (1979). "[Experience with cefaclor in the treatment of ear, nose and throat infections. Indications for cefaclor therapy (author's transl)]." <i>Infection</i> 7 Suppl 6: 609-614.                                | Title    |
| 211 | Ferreira, C., et al. (2018). "The scaffold protein PDZK1 modulates expression and function of the organic anion transporting polypeptide 2B1." <i>European Journal of Pharmaceutical Sciences</i> 120: 181-190.                         | Title    |
| 212 | Ferreira, J. M., et al. (2013). "Use of glass ionomer cement containing antibiotics to seal off infected dentin: a randomized clinical trial." <i>Brazilian dental journal</i> 24(1): 68-73.                                            | Title    |
| 213 | Fillastre, J. P., et al. (1980). "Cefaclor pharmacokinetics and renal impairment." <i>J Antimicrob Chemother</i> 6(1): 155-156.                                                                                                         | Title    |
| 214 | Finkelstein, E. R., et al. (1978). "Pharmacokinetics of oral cephalosporins." <i>J Pediatr</i> 93(5): 902.                                                                                                                              | Abstract |
| 215 | Flaherty, J. H. (1998). "Commonly Prescribed and Over-The-Counter Medications: Causes of Confusion." <i>Clinics in Geriatric Medicine</i> 14(1): 101-128.                                                                               | Title    |
| 216 | Flores-Murrieta, F. J., et al. (2001). "Oral pharmacokinetics of cefaclor in Mexican subjects." <i>Proc West Pharmacol Soc</i> 44: 71-72.                                                                                               | Title    |
| 217 | Fong, I. W., et al. (1995). "Clarithromycin versus cefaclor in lower respiratory tract infections. The Canadian Bronchitis Study Group." <i>Clinical and investigative medicine. Medecine clinique et experimentale</i> 18(2): 131-138. | Title    |
| 218 | Force, T. M. A. and T. M. A. R. Team. "Keppra suspension dosing hydrocodone."                                                                                                                                                           | Title    |
| 219 | Foster, D. R., et al. (2009). "Lack of interaction between the peptidomimetic substrates captopril and cephadrine." <i>J Clin Pharmacol</i> 49(3): 360-367.                                                                             | Title    |
| 220 | Foster, D. R. and X. Zheng (2007). "Cephalexin inhibits N-formylated peptide transport and intestinal hyperpermeability in Caco2 cells." <i>J Pharm Pharm Sci</i> 10(3): 299-310.                                                       | Abstract |

|     |                                                                                                                                                                                                                                                                                                  |          |
|-----|--------------------------------------------------------------------------------------------------------------------------------------------------------------------------------------------------------------------------------------------------------------------------------------------------|----------|
| 221 | Fowler, S., et al. (2022). "Addressing today's Absorption, Distribution, Metabolism, and Excretion (ADME) challenges in the translation of in vitro ADME characteristics to humans: a case study of the SMN2 mRNA splicing modifier risdiplam." <i>Drug metabolism disposition</i> 50(1): 65-75. | Title    |
| 222 | Fowler, S., et al. (2021). "Addressing today's ADME challenges in the translation of in vitro absorption, distribution, metabolism and excretion characteristics to human: A case study of the SMN2 mRNA splicing modifier risdiplam." <i>Drug metabolism disposition</i> .                      | Title    |
| 223 | Franke, A. A., et al. (2012). "Equol production changes over time in postmenopausal women." <i>The Journal of Nutritional Biochemistry</i> 23(6): 573-579.                                                                                                                                       | Title    |
| 224 | Fraschini, F., et al. (1988). "Correlation between plasma and tonsillar levels of cefroxadine." <i>Chemotherapy</i> 34(1): 8-12.                                                                                                                                                                 | Title    |
| 225 | Freeman, C. D., et al. (1994). "Minocycline: old and new therapeutic uses." <i>Int J Antimicrob Agents</i> 4(4): 325-335.                                                                                                                                                                        | Title    |
| 226 | Fresno, L., et al. (2008). "Placental transfer of etomidate in pregnant ewes after an intravenous bolus dose and continuous infusion." <i>The Veterinary Journal</i> 175(3): 395-402.                                                                                                            | Title    |
| 227 | Fujimori, I. (1982). "[Cefadroxil]." <i>Jpn J Antibiot</i> 35(12): 2736-2747.                                                                                                                                                                                                                    | Title    |
| 228 | Fujimoto, M., et al. (1985). "[Pharmacological and clinical studies on the long acting cefaclor (S6472)]." <i>Jpn J Antibiot</i> 38(3): 849-857.                                                                                                                                                 | Title    |
| 229 | Fujita, K., et al. (1983). "Clinical Evaluation of Norfloxacin in the Treatment of Superficial Suppurative Skin and Soft Tissue Infections -A Double-blind Study in Comparison with L-Cephalexin." <i>Rinsho hyoka (clinical evaluation)</i> 11(1): 133-154.                                     | Title    |
| 230 | Fujita, K., et al. (1982). "Clinical Evaluation of Cefadroxil in the Treatment of Superficial Suppurative Skin and Soft Tissue Infections - A Double-blind Study Comparing to L-Cephalexin." <i>Rinsho hyoka (clinical evaluation)</i> 10(1): 175-200.                                           | Title    |
| 231 | Ganapathy, M. E., et al. (2000). "beta-lactam antibiotics as substrates for OCTN2, an organic cation/carnitine transporter." <i>J Biol Chem</i> 275(3): 1699-1707.                                                                                                                               | Title    |
| 232 | Gandhi, M. D. (2005). <i>An amino acid transporter targeted approach for the treatment of cytomegalovirus infections</i> , University of Missouri-Kansas City.                                                                                                                                   | Title    |
| 233 | Gao, S., et al. (2008). "Determination of faropenem in human plasma and urine by liquid chromatography-tandem mass spectrometry." <i>Biomed Chromatogr</i> 22(1): 5-12.                                                                                                                          | Title    |
| 234 | García-Rodríguez, J. A., et al. (1995). "Oral cephalosporins: current perspectives." <i>Int J Antimicrob Agents</i> 5(4): 231-243.                                                                                                                                                               | Abstract |
| 235 | Garrigues, T. M., et al. (1991). "Dose-dependent absorption and elimination of cefadroxil in man." <i>Eur J Clin Pharmacol</i> 41(2): 179-183.                                                                                                                                                   | Title    |

|     |                                                                                                                                                                                                                                                       |          |
|-----|-------------------------------------------------------------------------------------------------------------------------------------------------------------------------------------------------------------------------------------------------------|----------|
| 236 | Garrison, D. A. (2022). Interaction of Gilteritinib, a novel FLT-3 Tyrosine Kinase Inhibitor, with Xenobiotic Uptake Transporters, The Ohio State University.                                                                                         | Title    |
| 237 | Garrison, K. L., et al. (2015). "Few Drugs Display Flip-Flop Pharmacokinetics and These Are Primarily Associated with Classes 3 and 4 of the BDDCS." J Pharm Sci 104(9): 3229-3235.                                                                   | Title    |
| 238 | Gartenberg, G., et al. (1979). "Pharmacokinetics of cefaclor in patients with stable renal impairment, and patients undergoing haemodialysis." J Antimicrob Chemother 5(4): 465-470.                                                                  | Title    |
| 239 | Genvresse, I. and C. Carbon (1993). "Cefixime." Int J Antimicrob Agents 3(1): 1-16.                                                                                                                                                                   | Title    |
| 240 | George, M. (2013). The role of organic cation transporters in the nasal uptake and brain distribution of organic cation substrates, The University of Iowa.                                                                                           | Title    |
| 241 | Gerardin, A., et al. (1982). "Pharmacokinetics of cefroxadin (CGP 9000) in man." J Pharmacokinet Biopharm 10(1): 15-26.                                                                                                                               | Title    |
| 242 | Gerber, M. A., et al. (1999). "Potential mechanisms for failure to eradicate group A streptococci from the pharynx." Pediatrics 104(4 Pt 1): 911-917.                                                                                                 | Title    |
| 243 | Ghafelehbashi, R., et al. (2019). "Preparation, physicochemical properties, in vitro evaluation and release behavior of cephalexin-loaded niosomes." Int J Pharm 569: 118580.                                                                         | Abstract |
| 244 | Ghafourian, T., et al. (2006). "QSPR models for the prediction of apparent volume of distribution." Int J Pharm 319(1): 82-97.                                                                                                                        | Title    |
| 245 | Gibson, M. J., et al. (1987). "The penetration of antibiotics into the normal intervertebral disc." J Bone Joint Surg Br 69(5): 784-786.                                                                                                              | Title    |
| 246 | Gillett, A. P. and Wise (1978). "Penetration of four cephalosporins into tissue fluid in man." Lancet 1(8071): 962-964.                                                                                                                               | Title    |
| 247 | Ginsburg, C. M. and G. H. McCracken, Jr. (1979). "Pharmacokinetics of cephradine suspension infants and children." Antimicrob Agents Chemother 16(1): 74-76.                                                                                          | Title    |
| 248 | Ginsburg, C. M. and G. H. McCracken, Jr. (1980). "Bioavailability of cefadroxil capsules and suspension in pediatric patients." J Int Med Res 8(Suppl 1): 9-14.                                                                                       | Title    |
| 249 | Gisby, J., et al. (1991). "Comparative efficacies of ciprofloxacin, amoxicillin, amoxicillin-clavulanic acid, and cefaclor against experimental Streptococcus pneumoniae respiratory infections in mice." Antimicrob Agents Chemother 35(5): 831-836. | Animal   |
| 250 | Gleckman, R., et al. (1981). "Trimethoprim: mechanisms of action, antimicrobial activity, bacterial resistance, pharmacokinetics, adverse reactions, and therapeutic indications." Pharmacotherapy 1(1): 14-20.                                       | Title    |

|     |                                                                                                                                                                                                                                                                                           |           |
|-----|-------------------------------------------------------------------------------------------------------------------------------------------------------------------------------------------------------------------------------------------------------------------------------------------|-----------|
| 251 | Goldstein, F. W. (1997). "Choice of an oral beta-lactam antibiotic for infections due to penicillin-resistant <i>Streptococcus pneumoniae</i> ." <i>Scand J Infect Dis</i> 29(3): 255-257.                                                                                                | Title     |
| 252 | Gonçalves, T. M., et al. (2008). "Determination of ampicillin in human plasma by solid-phase extraction–liquid chromatography–tandem mass spectrometry (spe-lc-ms/ms) and its use in bioequivalence studies." <i>Arzneimittelforschung</i> 58(02): 91-96.                                 | Title     |
| 253 | Gong, Q., et al. (2007). "Pharmacokinetic interaction between cefaclor and bromhexine in healthy Chinese volunteers." <i>Zhong Nan Da Xue Xue Bao Yi Xue Ban</i> 32(5): 855-861.                                                                                                          | Title     |
| 254 | Gonzalez, I. (1989). Absorption of flurbiprofen and some other drugs through the oral mucosa, University of Michigan.                                                                                                                                                                     | Title     |
| 255 | Goumas, P. D., et al. (1992). "Pharmacokinetic study of cefaclor in chronic maxillary sinusitis." <i>J Chemother</i> 4(3): 155-158.                                                                                                                                                       | Title     |
| 256 | Grassi, G. G. (1994). "Comparative clinical efficacy of cefetamet pivoxil in lower respiratory tract infection." <i>Drugs</i> 47 Suppl 3: 35-42.                                                                                                                                          | Title     |
| 257 | Green, E. R., et al. (1981). "A Comparison of the Penetration Characteristics of Cephapirin and Cephalothin into Right Atrial Appendage, Muscle, Fat, and Pericardial Fluid of Pediatric Patients Undergoing Open-Heart Operation." <i>The Annals of Thoracic Surgery</i> 31(2): 155-160. | Title     |
| 258 | Greene, D. S., et al. (1976). "Pharmacokinetics of cephalexin: an evaluation of one- and two-compartment model pharmacokinetics." <i>J Clin Pharmacol</i> 16(5-6): 257-264.                                                                                                               | Full text |
| 259 | Greenfield, R. A. (1993). "Symposium on antimicrobial therapy. IV. The cephalosporins." <i>J Okla State Med Assoc</i> 86(1): 7-12.                                                                                                                                                        | Title     |
| 260 | Griffith, R. S. (1983). "The pharmacology of cephalexin." <i>Postgrad Med J</i> 59 Suppl 5: 16-27.                                                                                                                                                                                        | Title     |
| 261 | Griffith, R. S. and H. R. Black (1970). "Cephalexin." <i>Med Clin North Am</i> 54(5): 1229-1244.                                                                                                                                                                                          | Abstract  |
| 262 | Groneberg, D. A., et al. (2001). "Intestinal peptide transport: ex vivo uptake studies and localization of peptide carrier PEPT1." <i>Am J Physiol Gastrointest Liver Physiol</i> 281(3): G697-704.                                                                                       | Title     |
| 263 | Groneberg, D. A., et al. (2002). "Distribution and function of the peptide transporter PEPT2 in normal and cystic fibrosis human lung." <i>Thorax</i> 57(1): 55-60.                                                                                                                       | Title     |
| 264 | Grujić, Z., et al. (2009). "[Single dose of antibiotic prophylaxis in elective cesarean sections]." <i>Med Pregl</i> 62(3-4): 101-106.                                                                                                                                                    | Title     |
| 265 | Guay, D. R. (2004). "Oritavancin and tigecycline: investigational antimicrobials for multidrug-resistant bacteria." <i>Pharmacotherapy: The Journal of Human Pharmacology Drug Therapy</i> 24(1): 58-68.                                                                                  | Title     |
| 266 | Guay, D. R. P. (2002). "Cefdinir: An advanced-generation, broad-spectrum oral cephalosporin." <i>Clin Ther</i> 24(4): 473-489.                                                                                                                                                            | Title     |

|     |                                                                                                                                                                                                                                                                                                                                                                                                                    |          |
|-----|--------------------------------------------------------------------------------------------------------------------------------------------------------------------------------------------------------------------------------------------------------------------------------------------------------------------------------------------------------------------------------------------------------------------|----------|
| 267 | Gubbins, P. O., et al. (1998). "Rapid and sensitive high performance liquid chromatographic method for the determination of itraconazole and its hydroxy-metabolite in human serum1Presented at the Analysis and Pharmaceutical Quality Section of the Eleventh Annual American Association of Pharmaceutical Scientists Meeting, October 1996, Seattle, Washington, USA.1." J Pharm Biomed Anal 16(6): 1005-1012. | Title    |
| 268 | Guggenbichler, J. P. and G. Kienel (1978). "[Bioavailability of new galenic preparations of cephalexin (author's transl)]." Padiatr Padol 13(3): 315-320.                                                                                                                                                                                                                                                          | Title    |
| 269 | Guggenbichler, J. P. and G. Kienel (1979). "Bioavailability of oral antibiotics in cystic fibrosis." Monogr Paediatr 10: 34-40.                                                                                                                                                                                                                                                                                    | Title    |
| 270 | Guggenbichler, J. P. and G. Kienel (1979). "[Bioavailability of orally administered antibiotics: influences of food on resorption (author's transl)]." Padiatr Padol 14(1): 69-74.                                                                                                                                                                                                                                 | Title    |
| 271 | Guggenbichler, J. P., et al. (1981). "[Pharmacokinetic of antibiotics in patients with mucoviscidosis (author's transl)]." Padiatr Padol 16(4): 393-402.                                                                                                                                                                                                                                                           | Title    |
| 272 | Guggenbichler, J. P. and J. Schneeberger (1987). "Antimicrobial chemotherapy in patients with cystic fibrosis." Infection 15(5): 397-402.                                                                                                                                                                                                                                                                          | Title    |
| 273 | Gupta, A., et al. (2013). "Simultaneous quantification of prodrug oseltamivir and its metabolite oseltamivir carboxylate in human plasma by LC–MS/MS to support a bioequivalence study." Journal of Pharmaceutical Analysis 3(3): 149-160.                                                                                                                                                                         | Title    |
| 274 | Gwee, A., et al. (2020). "Twice- and Thrice-daily Cephalexin Dosing for Staphylococcus aureus Infections in Children." Pediatr Infect Dis J 39(6): 519-522.                                                                                                                                                                                                                                                        | Abstract |
| 275 | Hagihara, M., et al. (2021). "Pharmacodynamic evaluation of meropenem, cefepime, or aztreonam combined with a novel $\beta$ -lactamase inhibitor, nacubactam, against carbapenem-resistant and/or carbapenemase-producing Klebsiella pneumoniae and Escherichia coli using a murine thigh-infection model." Int J Antimicrob Agents 57(5): 106330.                                                                 | Animal   |
| 276 | Haginaka, J., et al. (1980). "Chromatographic analysis and pharmacokinetic investigation of cephaloglycin and its metabolites in man." J Antibiot (Tokyo) 33(2): 236-243.                                                                                                                                                                                                                                          | Title    |
| 277 | Haginaka, J., et al. (1979). "Evaluation of effect of food ingestion on bioavailability of cephalexin by moment analysis." Chem Pharm Bull (Tokyo) 27(12): 3156-3159.                                                                                                                                                                                                                                              | Abstract |
| 278 | Haines, S. T. and M. A. Kraynak (1994). "Twice-daily cefaclor therapy." Ann Pharmacother 28(12): 1353-1355.                                                                                                                                                                                                                                                                                                        | Title    |
| 279 | Hammami, M. M., et al. (2017). "Generic-reference and generic-generic bioequivalence of forty-two, randomly-selected, on-market generic products of fourteen immediate-release oral drugs." BMC Pharmacol Toxicol 18(1): 78.                                                                                                                                                                                       | Title    |

|     |                                                                                                                                                                                                                                    |          |
|-----|------------------------------------------------------------------------------------------------------------------------------------------------------------------------------------------------------------------------------------|----------|
| 280 | Hammami, M. M., et al. (2017). "Does the placebo effect modulate drug bioavailability? Randomized cross-over studies of three drugs." J Negat Results Biomed 16(1): 10.                                                            | Title    |
| 281 | Hammond, D. and M. A. Abate (1989). "Theophylline toxicity, acute illness, and cefaclor administration." Dicp 23(4): 339-340.                                                                                                      | Title    |
| 282 | Hampel, B., et al. (1982). "Pharmacokinetics of cefadroxil and cefaclor during an eight-day dosage period." Antimicrob Agents Chemother 22(6): 1061-1063.                                                                          | Title    |
| 283 | Hampson, N. B., et al. (1991). "Oral Antibiotics for Pneumonia." Clinics in Chest Medicine 12(2): 395-407.                                                                                                                         | Title    |
| 284 | Han, H. K., et al. (1998). "Cellular uptake mechanism of amino acid ester prodrugs in Caco-2/hPEPT1 cells overexpressing a human peptide transporter." Pharm Res 15(9): 1382-1386.                                                 | Title    |
| 285 | Han, S. Y., et al. (2012). "Reduced clearance of $\epsilon$ -acetamidocaproic acid in rats with acute renal failure induced by uranyl nitrate." Journal of Pharmacy Pharmacology 64(10): 1452-1460.                                | Animal   |
| 286 | Hansen, E., et al. (2014). "Perioperative Antibiotics." The Journal of Arthroplasty 29(2, Supplement): 29-48.                                                                                                                      | Title    |
| 287 | Hara, J., et al. (1985). "Study on the transfer of cefroxadine to human tears." Japanese journal of antibiotics 38(2): 230-234.                                                                                                    | Title    |
| 288 | Harrison, C. J., et al. (1985). "A multicenter comparison of related pharmacologic features of cephalexin and dicloxacillin given for two months to young children with cystic fibrosis." Pediatr Pharmacol (New York) 5(1): 7-16. | Abstract |
| 289 | Hartstein, A. I., et al. (1977). "Comparison of pharmacological and antimicrobial properties of cefadroxil and cephalexin." Antimicrob Agents Chemother 12(1): 93-97.                                                              | Abstract |
| 290 | Harvengt, C., et al. (1973). "Cephadrine absorption and excretion in fasting and nonfasting volunteers." J Clin Pharmacol New Drugs 13(1): 36-40.                                                                                  | Title    |
| 291 | Hayakawa, F., et al. (1989). "[Laboratory and clinical studies on ceftoram pivoxil in the field of pediatrics]." Jpn J Antibiot 42(8): 1849-1859.                                                                                  | Title    |
| 292 | Henry, N. K., et al. (2000). "Antimicrobial Therapy for Infants and Children: Guidelines for the Inpatient and Outpatient Practice of Pediatric Infectious Diseases." Mayo Clinic Proceedings 75(1): 86-97.                        | Title    |
| 293 | Henwood, J. M. and J. P. Monk (1988). "Enoxacin. A review of its antibacterial activity, pharmacokinetic properties and therapeutic use." Drugs 36(1): 32-66.                                                                      | Title    |
| 294 | Hermann, R., et al. (1996). "Enantioselective pharmacokinetics and bioavailability of different racemic $\alpha$ -lipoic acid formulations in healthy volunteers." European Journal of Pharmaceutical Sciences 4(3): 167-174.      | Title    |

|     |                                                                                                                                                                                                                            |        |
|-----|----------------------------------------------------------------------------------------------------------------------------------------------------------------------------------------------------------------------------|--------|
| 295 | Hernandez, B. N., et al. (2023). "MIC Discrepancies between Parenteral and Oral Anti-Staphylococcal Beta-Lactams among MSSA." <i>Chemotherapy</i> 68(1): 55-60.                                                            | Title  |
| 296 | Hernández, M., et al. (2003). "Analysis of antibiotics in biological samples by capillary electrophoresis." <i>TrAC Trends in Analytical Chemistry</i> 22(7): 416-427.                                                     | Title  |
| 297 | Herrera-Ruiz, D. and G. T. Knipp (2003). "Current Perspectives on Established and Putative Mammalian Oligopeptide Transporters." <i>J Pharm Sci</i> 92(4): 691-714.                                                        | Animal |
| 298 | Hicks, M. J. and C. M. Flaitz (1993). "The role of antibiotics in platelet dysfunction and coagulopathy." <i>Int J Antimicrob Agents</i> 2(3): 129-149.                                                                    | Title  |
| 299 | Hidalgo, I. J., et al. (1993). "pH-dependent transepithelial transport of cephalexin in rabbit intestinal mucosa." <i>Int J Pharm</i> 98(1): 83-92.                                                                        | Animal |
| 300 | Hirata-Dulas, C. A. I., et al. (1994). "Evaluation of Two Intravenous Single-Bolus Methods for Measuring Effective Renal Plasma Flow." <i>American Journal of Kidney Diseases</i> 23(3): 374-381.                          | Title  |
| 301 | Hirayama, F. and K. Uekama (2007). "Colonic delivery." <i>Biotechnology: Pharmaceutical Aspects</i> Ronald T. Borchardt                                                                                                    | Title  |
| 302 | C. Russell Middaugh, Series Editors Volume I: <i>Pharmaceutical Profiling in Drug Discovery for Lead Selection</i> .                                                                                                       | Title  |
| 303 | Hiremath, C. N. (2021). "Abbreviated Profile of Drugs (APOD): modeling drug safety profiles to prioritize investigational COVID-19 treatments." <i>Heliyon</i> 7(8): e07666.                                               | Title  |
| 304 | Hochman, J., et al. (2015). "Drug–drug interactions related to altered absorption and plasma protein binding: Theoretical and regulatory considerations, and an industry perspective." <i>J Pharm Sci</i> 104(3): 916-929. | Title  |
| 305 | Hoekman, J. D. (2010). <i>The Impact of Enhanced Olfactory Deposition and Retention on Direct Nose-to-Brain Drug Delivery</i> , University of Washington.                                                                  | Title  |
| 306 | Hoepelman, I. M. and M. M. E. Schneider (1995). "Azithromycin: the first of the tissue-selective azalides." <i>Int J Antimicrob Agents</i> 5(3): 145-167.                                                                  | Title  |
| 307 | Höffler, D. and P. Koeppe (1975). "[Pharmacokinetics of intravenous Cefradin in normal and restricted renal function (author's transl)]." <i>MMW Munch Med Wochenschr</i> 117(27): 1169-1174.                              | Title  |
| 308 | Holm, S. E. (1994). "Reasons for failures in penicillin treatment of streptococcal tonsillitis and possible alternatives." <i>Pediatr Infect Dis J</i> 13(1 Suppl 1): S66-69; discussion S78-69.                           | Title  |
| 309 | Hopkins, S. (1991). "Clinical toleration and safety of azithromycin." <i>The American Journal of Medicine</i> 91(3, Supplement 1): S40-S45.                                                                                | Title  |

|     |                                                                                                                                                                                                                                                                                           |          |
|-----|-------------------------------------------------------------------------------------------------------------------------------------------------------------------------------------------------------------------------------------------------------------------------------------------|----------|
| 310 | Hori, R., et al. (1983). "Ampicillin and cephalixin in renal insufficiency." Clin Pharmacol Ther 34(6): 792-798.                                                                                                                                                                          | Abstract |
| 311 | Hori, R., et al. (1985). "A new dosing regimen in renal insufficiency: application to cephalixin." Clin Pharmacol Ther 38(3): 290-295.                                                                                                                                                    | Abstract |
| 312 | Horii, M., et al. (1985). "Clinical evaluation of sustained release preparations of cefaclor in dental infections. Comparative double blind clinical studies of sustained release preparations with a regular preparation of cefaclor." Japanese journal of antibiotics 38(4): 1117-1140. | Title    |
| 313 | Howard, C. R. and R. A. Lawrence (1999). "Drugs and Breastfeeding." Clinics in Perinatology 26(2): 447-478.                                                                                                                                                                               | Title    |
| 314 | Hu, L., et al. (2011). "Floating matrix dosage form for dextromethorphan hydrobromide based on gas forming technique: in vitro and in vivo evaluation in healthy volunteers." 42(1-2): 99-105.                                                                                            | Title    |
| 315 | Hu, M., et al. (1996). "Uptake characteristics of loracarbef and cephalixin in the Caco-2 cell culture model: effects of the proton gradient and possible presence of a distinctive second component." J Pharm Sci 85(7): 767-772.                                                        | Abstract |
| 316 | Hu, M., et al. (1994). "Mechanism and kinetics of transcellular transport of a new beta-lactam antibiotic loracarbef across an intestinal epithelial membrane model system (Caco-2)." Pharm Res 11(10): 1405-1413.                                                                        | Abstract |
| 317 | Hu, M., et al. (1999). "Transport and metabolic characterization of Caco-2 cells expressing CYP3A4 and CYP3A4 plus oxidoreductase." Pharm Res 16(9): 1352-1359.                                                                                                                           | Title    |
| 318 | Hu, Y. (2015). Development, characterization and application of a novel mouse line humanized for the intestinal peptide transporter PEPT1, University of Michigan.                                                                                                                        | Animal   |
| 319 | Hu, Y. and D. E. Smith (2016). "Species differences in the pharmacokinetics of cefadroxil as determined in wildtype and humanized PepT1 mice." Biochem Pharmacol 107: 81-90.                                                                                                              | Animal   |
| 320 | Hu, Y. and D. E. Smith (2019). "In Silico Prediction of the Absorption and Disposition of Cefadroxil in Humans using an Intestinal Permeability Method Scaled from Humanized PepT1 Mice." Drug Metab Dispos 47(3): 173-183.                                                               | Animal   |
| 321 | Huang, C., et al. (2014). "Determination of cefaclor by UPLC-MS-MS for a Chinese pharmacokinetic study." J Chromatogr Sci 52(7): 636-640.                                                                                                                                                 | Title    |
| 322 | Hubsher, J. A., et al. (1976). "Double-blind comparison of cephradine and cephalixin in the treatment of skin and soft-tissue infections due to Staphylococcus aureus." Curr Ther Res Clin Exp 19(6): 579-588.                                                                            | Abstract |
| 323 | Huh, Y. M. (2013). Effect of Inflammation on Cefadroxil Pharmacokinetics in Brain and Kidney and Pharmacometric Modeling of PEPT2-Mediated Disposition of Glycylsarcosine in Brain.                                                                                                       | Title    |
| 324 | Humair, L. (1973). "[Antibiotic therapy in renal failure (author's transl)]." Munch Med Wochenschr 115(39): 1657-1660.                                                                                                                                                                    | Title    |



|     |                                                                                                                                                                                                                                                                                                                               |          |
|-----|-------------------------------------------------------------------------------------------------------------------------------------------------------------------------------------------------------------------------------------------------------------------------------------------------------------------------------|----------|
| 325 | Huo, X., et al. (2014). "Inhibitory Effect of Valsartan on the Intestinal Absorption and Renal Excretion of Bestatin in Rats." J Pharm Sci 103(2): 719-729.                                                                                                                                                                   | Animal   |
| 326 | Hurst, D. J. (1984). "A comparison of cefaclor and tetracycline in the treatment of bacterial bronchitis." Clin Ther 6(2): 163-169.                                                                                                                                                                                           | Title    |
| 327 | Iakovlev, V. P., et al. (1977). "[Pharmacokinetics of cephalexin and cephradine in surgical patients]." Antibiotiki 22(8): 739-742.                                                                                                                                                                                           | Abstract |
| 328 | Ilett, K. F., et al. (2006). "Transfer of probenecid and cephalexin into breast milk." Ann Pharmacother 40(5): 986-989.                                                                                                                                                                                                       | Title    |
| 329 | Imran, M., et al. (2016). "Glycoside-based niosomal nanocarrier for enhanced in-vivo performance of Cefixime." Int J Pharm 505(1): 122-132.                                                                                                                                                                                   | Title    |
| 330 | Inoue, D., et al. (2020). "Effect of cerebrospinal fluid circulation on nose-to-brain direct delivery and distribution of caffeine in rats." Molecular Pharmaceutics 17(11): 4067-4076.                                                                                                                                       | Animal   |
| 331 | Inui, K., et al. (1992). "Transepithelial transport of oral cephalosporins by monolayers of intestinal epithelial cell line Caco-2: specific transport systems in apical and basolateral membranes." J Pharmacol Exp Ther 261(1): 195-201.                                                                                    | Title    |
| 332 | Iravani, A. and W. Bischoff (1992). "Antibiotic therapy for urinary tract infections." The American Journal of Medicine 92(6, Supplement 1): S95-S100.                                                                                                                                                                        | Title    |
| 333 | Iseki, K., et al. (1994). "[Effect of Enterued administration on the intestinal absorption of orally active cefem antibiotics]." Yakugaku Zasshi 114(4): 233-240.                                                                                                                                                             | Title    |
| 334 | Ishikawa, J., et al. (1988). "[Clinical studies on sultamicillin fine granule in pediatric field]." Jpn J Antibiot 41(12): 1965-1971.                                                                                                                                                                                         | Title    |
| 335 | Isla, A., et al. (2005). "Análisis farmacocinético/farmacodinámico (PK/PD) de la antibioterapia en odontoestomatología." Enfermedades Infecciosas y Microbiología Clínica 23(3): 116-121.                                                                                                                                     | Language |
| 336 | Ito, S., et al. (1993). "Prospective follow-up of adverse reactions in breast-fed infants exposed to maternal medication." American Journal of Obstetrics and Gynecology 168(5): 1393-1399.                                                                                                                                   | Title    |
| 337 | Ito, S., et al. (2012). "Competitive inhibition of the luminal efflux by multidrug and toxin extrusions, but not basolateral uptake by organic cation transporter 2, is the likely mechanism underlying the pharmacokinetic drug-drug interactions caused by cimetidine in the kidney." J Pharmacol Exp Ther 340(2): 393-403. | Title    |
| 338 | Iwai, N., et al. (1986). "[Fundamental and clinical studies on cefixime in pediatrics]." Jpn J Antibiot 39(4): 1087-1105.                                                                                                                                                                                                     | Title    |
| 339 | Izquierdo-Barba, I., et al. (2016). "Zwitterionic ceramics for biomedical applications." Acta Biomaterialia 40: 201-211.                                                                                                                                                                                                      | Title    |

|     |                                                                                                                                                                                                                                                                        |           |
|-----|------------------------------------------------------------------------------------------------------------------------------------------------------------------------------------------------------------------------------------------------------------------------|-----------|
| 340 | Jackson, A. J. and M. L. Chen (1987). "Application of moment analysis in assessing rates of absorption for bioequivalency studies." J Pharm Sci 76(1): 6-9.                                                                                                            | Title     |
| 341 | Jacobs, M. R., et al. (2007). "Oral beta-lactams applied to uncomplicated infections of skin and skin structures." Diagn Microbiol Infect Dis 57(3 Suppl): 55s-65s.                                                                                                    | Title     |
| 342 | Jahanfar, S., et al. (2013). "Antibiotics for mastitis in breastfeeding women." Cochrane Database of Systematic Reviews(2).                                                                                                                                            | Title     |
| 343 | Jain, D. S., et al. (2016). "Thermosensitive PLA based nanodispersion for targeting brain tumor via intranasal route." Materials Science and Engineering: C 63: 411-421.                                                                                               | Title     |
| 344 | James, A. J., et al. (2020). "Pharmacokinetic profile of gilteritinib: a novel FLT-3 tyrosine kinase inhibitor." Clin Pharmacokinet 59: 1273-1290.                                                                                                                     | Title     |
| 345 | James, N. C., et al. (1991). "Pharmacokinetics of cefuroxime axetil and cefaclor: relationship of concentrations in serum to MICs for common respiratory pathogens." Antimicrob Agents Chemother 35(9): 1860-1863.                                                     | Title     |
| 346 | Jana, S. and H. Rastogi (2017). "Effects of caffeic acid and quercetin on in vitro permeability, metabolism and in vivo pharmacokinetics of melatonin in rats: potential for herb-drug interaction." European journal of drug metabolism pharmacokinetics 42: 781-791. | Animal    |
| 347 | Jappar, D. (2009). Role of proton-coupled oligopeptide transporters in small peptide absorption and disposition, University of Michigan.                                                                                                                               | Title     |
| 348 | Jappar, D., et al. (2011). "Effect of dose escalation on the in vivo oral absorption and disposition of glycylsarcosine in wild-type and PepT1 knockout mice." Drug metabolism disposition 39(12): 2250-2257.                                                          | Animal    |
| 349 | Jayasagar, G., et al. (2002). "Effect of cephalexin on the pharmacokinetics of metformin in healthy human volunteers." Drug Metabol Drug Interact 19(1): 41-48.                                                                                                        | Full text |
| 350 | Jeong, S.-H., et al. (2021). "Population pharmacokinetic analysis of cefaclor in healthy Korean subjects." Pharmaceutics 13(5): 754.                                                                                                                                   | Title     |
| 351 | Johansson, S., et al. (2017). "Tenapanor administration and the activity of the H(+) -coupled transporter PepT1 in healthy volunteers." Br J Clin Pharmacol 83(9): 2008-2014.                                                                                          | Title     |
| 352 | Johnson, C. A., et al. (1984). "Pharmacokinetics of oral cephradine in continuous ambulatory peritoneal dialysis patients." Nephron 38(1): 57-61.                                                                                                                      | Title     |
| 353 | Johnson, D. M., et al. (2000). "Antimicrobial activity and in vitro susceptibility test development for cefditoren against Haemophilus influenzae, Moraxella catarrhalis, and Streptococcus species." Diagn Microbiol Infect Dis 37(2): 99-105.                        | Title     |

|     |                                                                                                                                                                                                                                                                                                                                                                                                                                                                                                                                                                                                                                                                                                                                                                                                                                                                                                                                                                                                                                                                                                                                                                                                                                                                                                                                                                                                                                                                                                                                                                                                                                                                                                                                                                                                                                                                                                                                                                                                                                                                                                                                                                                                                                                                                                                            |          |
|-----|----------------------------------------------------------------------------------------------------------------------------------------------------------------------------------------------------------------------------------------------------------------------------------------------------------------------------------------------------------------------------------------------------------------------------------------------------------------------------------------------------------------------------------------------------------------------------------------------------------------------------------------------------------------------------------------------------------------------------------------------------------------------------------------------------------------------------------------------------------------------------------------------------------------------------------------------------------------------------------------------------------------------------------------------------------------------------------------------------------------------------------------------------------------------------------------------------------------------------------------------------------------------------------------------------------------------------------------------------------------------------------------------------------------------------------------------------------------------------------------------------------------------------------------------------------------------------------------------------------------------------------------------------------------------------------------------------------------------------------------------------------------------------------------------------------------------------------------------------------------------------------------------------------------------------------------------------------------------------------------------------------------------------------------------------------------------------------------------------------------------------------------------------------------------------------------------------------------------------------------------------------------------------------------------------------------------------|----------|
| 354 | Johnson, V. M., et al. (2000). "Determination of the cephalosporin antibiotic cephadrine in human plasma by high-performance liquid chromatography with ultraviolet detection." J Chromatogr B Biomed Sci Appl 740(1): 71-80.                                                                                                                                                                                                                                                                                                                                                                                                                                                                                                                                                                                                                                                                                                                                                                                                                                                                                                                                                                                                                                                                                                                                                                                                                                                                                                                                                                                                                                                                                                                                                                                                                                                                                                                                                                                                                                                                                                                                                                                                                                                                                              | Title    |
| 355 | Jones, S., et al. (1985). "Pharmacokinetic and therapeutic trial of sultamicillin in acute sinusitis." Antimicrob Agents Chemother 28(6): 832-833.                                                                                                                                                                                                                                                                                                                                                                                                                                                                                                                                                                                                                                                                                                                                                                                                                                                                                                                                                                                                                                                                                                                                                                                                                                                                                                                                                                                                                                                                                                                                                                                                                                                                                                                                                                                                                                                                                                                                                                                                                                                                                                                                                                         | Title    |
| 356 | Jonkman, J. H. and R. A. Upton (1984). "Pharmacokinetic drug interactions with theophylline." Clin Pharmacokinet 9(4): 309-334.                                                                                                                                                                                                                                                                                                                                                                                                                                                                                                                                                                                                                                                                                                                                                                                                                                                                                                                                                                                                                                                                                                                                                                                                                                                                                                                                                                                                                                                                                                                                                                                                                                                                                                                                                                                                                                                                                                                                                                                                                                                                                                                                                                                            | Title    |
| 357 | Since up to 90% of a theophylline dose is biotransformed, drugs influencing microsomal enzyme systems in the liver may affect the elimination of theophylline. Other integrated mechanisms (e.g., hepatic uptake) may also be altered by concurrent administration of other drugs. Whatever the mechanism, the interaction may be sufficient to necessitate adjustment of the theophylline dosage, preferably guided by plasma theophylline determinations. Comedication with phenobarbitone may require an increase in theophylline dose by about 30% due to increased clearance resulting from enzyme induction. Similarly, with phenytoin and carbamazepine, a dose increase of about 40-50% may be required. In the case of rifampicin, isoniazid, or sulphinpyrazone comedication, an increase in dose of theophylline by about 20-25% may be needed. On the other hand, other drugs decrease theophylline clearance, making a reduction in the dose of concurrent theophylline advisable; with usual doses of erythromycin, propranolol, and isoprenaline (isoproterenol), a reduction of about 25% is needed; with cimetidine and oral contraceptive by about 30% or more; and with triacetyloleandomycin (troleandomycin), by about 50%. In high doses, the xanthine oxidase inhibitor allopurinol can also retard theophylline elimination, and a reduction of the theophylline dose by about 20% may be advisable. Conflicting results have been reported on the influence of frusemide (furosemide) and influenza vaccines, while data regarding the effect of corticosteroids, benzodiazepines, and verapamil on theophylline kinetics are not yet conclusive. Many drugs, however, appear not to significantly affect theophylline clearance. Some are from the same therapeutic group as the drugs mentioned above and offer clinical alternatives for coadministration with theophylline. Examples of drugs not found to have a significant effect on theophylline pharmacokinetics are ranitidine, josamycin, midecamycin, amoxycillin, tetracycline, cephalixin, cefaclor, orciprenaline, metoprolol, antacids, medroxyprogesterone acetate, metoclopramide, and metronidazole. Most of the drugs discussed in this review appear to not affect the volume of distribution of theophylline significantly. | Title    |
| 358 | Jonkman, J. H., et al. (1985). "No effect of cefaclor on theophylline pharmacokinetics." Eur J Respir Dis 66(1): 47-49.                                                                                                                                                                                                                                                                                                                                                                                                                                                                                                                                                                                                                                                                                                                                                                                                                                                                                                                                                                                                                                                                                                                                                                                                                                                                                                                                                                                                                                                                                                                                                                                                                                                                                                                                                                                                                                                                                                                                                                                                                                                                                                                                                                                                    | Title    |
| 359 | Jonkman, J. H., et al. (1986). "Clinical pharmacokinetics of theophylline during co-treatment with cefaclor." Int J Clin Pharmacol Ther Toxicol 24(2): 88-92.                                                                                                                                                                                                                                                                                                                                                                                                                                                                                                                                                                                                                                                                                                                                                                                                                                                                                                                                                                                                                                                                                                                                                                                                                                                                                                                                                                                                                                                                                                                                                                                                                                                                                                                                                                                                                                                                                                                                                                                                                                                                                                                                                              | Title    |
| 360 | Jung, H., et al. (1991). "Bioavailability of cephalixine dosage forms." Drug Dev Ind Pharm 17(16): 2173-2183.                                                                                                                                                                                                                                                                                                                                                                                                                                                                                                                                                                                                                                                                                                                                                                                                                                                                                                                                                                                                                                                                                                                                                                                                                                                                                                                                                                                                                                                                                                                                                                                                                                                                                                                                                                                                                                                                                                                                                                                                                                                                                                                                                                                                              | Abstract |

|     |                                                                                                                                                                                                                                                                                     |        |
|-----|-------------------------------------------------------------------------------------------------------------------------------------------------------------------------------------------------------------------------------------------------------------------------------------|--------|
| 361 | Kafetzis, D. A. (1994). "Multi-investigator evaluation of the efficacy and safety of cefprozil, amoxicillin-clavulanate, cefixime and cefaclor in the treatment of acute otitis media." <i>European journal of clinical microbiology &amp; infectious diseases</i> 13(10): 857-865. | Title  |
| 362 | Kamal, M. A., et al. (2008). "Role and relevance of PEPT2 in drug disposition, dynamics, and toxicity." <i>Drug Metab Pharmacokinet</i> 23(4): 236-242.                                                                                                                             | Title  |
| 363 | Kamath, A. V., et al. (2005). "Multiple pathways are involved in the oral absorption of BMS-262084, a tryptase inhibitor, in rats: role of paracellular transport, binding to trypsin, and P-glycoprotein efflux." <i>J Pharm Sci</i> 94(5): 1115-1123.                             | Animal |
| 364 | Kamiya, A., et al. (1983). "Quantitative investigation on renal handling of drugs in rabbits, dogs, and humans." <i>J Pharm Sci</i> 72(4): 440-443.                                                                                                                                 | Animal |
| 365 | Kammer, R. B. and R. Ress (1991). "Randomized comparative study of ceftibuten versus cefaclor in the treatment of acute lower respiratory tract infections." <i>Diagn Microbiol Infect Dis</i> 14(1): 101-105.                                                                      | Title  |
| 366 | Kang, Y.-S., et al. (2006). "A specific and rapid HPLC assay for the determination of cefroxadine in human plasma and its application to pharmacokinetic study in Korean." <i>J Pharm Biomed Anal</i> 40(2): 369-374.                                                               | Title  |
| 367 | Kano, E. K., et al. (2008). "Bioequivalence study of two oral formulations of cefadroxil in healthy volunteers." <i>Arzneimittelforschung</i> 58(1): 42-47.                                                                                                                         | Title  |
| 368 | Kaplan, N., et al. (2013). "AFN-1252 in vitro absorption studies and pharmacokinetics following microdosing in healthy subjects." <i>European Journal of Pharmaceutical Sciences</i> 50(3): 440-446.                                                                                | Title  |
| 369 | Karaoui, L. R., et al. (2013). "Oritavancin: an investigational lipoglycopeptide antibiotic." <i>Am J Health Syst Pharm</i> 70(1): 23-33.                                                                                                                                           | Title  |
| 370 | Karbownik, A., et al. (2020). "Pharmacokinetic interaction between sorafenib and atorvastatin, and sorafenib and metformin in rats." <i>Pharmaceutics</i> 12(7): 600.                                                                                                               | Animal |
| 371 | Karim, S., et al. (2003). "The effect of four different types of food on the bioavailability of cefaclor." <i>Eur J Drug Metab Pharmacokinet</i> 28(3): 185-190.                                                                                                                    | Title  |
| 372 | Kato, K., et al. (2014). "Investigation of endogenous compounds for assessing the drug interactions in the urinary excretion involving multidrug and toxin extrusion proteins." <i>Pharm Res</i> 31: 136-147.                                                                       | Title  |
| 373 | Kato, Y., et al. (2009). "Investigation of the role of oligopeptide transporter PEPT1 and sodium/glucose cotransporter SGLT1 in intestinal absorption of their substrates using small GTP-binding protein Rab8-null mice." <i>Drug metabolism disposition</i> 37(3): 602-607.       | Animal |

|     |                                                                                                                                                                                                                                                                           |          |
|-----|---------------------------------------------------------------------------------------------------------------------------------------------------------------------------------------------------------------------------------------------------------------------------|----------|
| 374 | Katragadda, S., et al. (2008). "Pharmacokinetics of amino acid ester prodrugs of acyclovir after oral administration: interaction with the transporters on Caco-2 cells." <i>Int J Pharm</i> 362(1-2): 93-101.                                                            | Title    |
| 375 | Kawami, M., et al. (2017). "Effect of Curcuma comosa extracts on the functions of peptide transporter and P-glycoprotein in intestinal epithelial cells." <i>Pharmazie</i> 72(2): 123-127.                                                                                | Title    |
| 376 | Kearns, G. L., et al. (1994). "Serum sickness-like reactions to cefaclor: role of hepatic metabolism and individual susceptibility." <i>J Pediatr</i> 125(5 Pt 1): 805-811.                                                                                               | Title    |
| 377 | Kerin, M. J., et al. (1992). "Is antibiotic penetration compromised in the ischaemic tissues of patients undergoing amputation?" <i>Ann R Coll Surg Engl</i> 74(4): 274-276.                                                                                              | Title    |
| 378 | Kesarwani, K. and R. Gupta (2013). "Bioavailability enhancers of herbal origin: An overview." <i>Asian Pacific Journal of Tropical Biomedicine</i> 3(4): 253-266.                                                                                                         | Title    |
| 379 | Khamdang, S., et al. (2003). "Interaction of human and rat organic anion transporter 2 with various cephalosporin antibiotics." <i>Eur J Pharmacol</i> 465(1-2): 1-7.                                                                                                     | Animal   |
| 380 | Khan, B. A., et al. (2004). "Comparative effect of different types of food on the bioavailability of cefaclor extended release tablet." <i>Eur J Drug Metab Pharmacokinet</i> 29(2): 125-132.                                                                             | Title    |
| 381 | Kiani, R. (1991). "Double-blind, double-dummy comparison of azithromycin and cephalexin in the treatment of skin and skin structure infections." <i>European journal of clinical microbiology &amp; infectious diseases</i> 10(10): 880-884.                              | Abstract |
| 382 | Kim, Y. C., et al. (2014). "Effects of 1 $\alpha$ , 25-dihydroxyvitamin D <sub>3</sub> , the natural vitamin D receptor ligand, on the pharmacokinetics of cefdinir and cefadroxil, organic anion transporter substrates, in rat." <i>J Pharm Sci</i> 103(11): 3793-3805. | Animal   |
| 383 | Kimoto, E., et al. (2017). "Hepatobiliary Clearance Prediction: Species Scaling From Monkey, Dog, and Rat, and In Vitro–In Vivo Extrapolation of Sandwich-Cultured Human Hepatocytes Using 17 Drugs." <i>J Pharm Sci</i> 106(9): 2795-2804.                               | Animal   |
| 384 | Kimura, H., et al. (1989). "[Bacteriological, pharmacokinetic and clinical studies on cefpodoxime proxetil in the pediatric field]." <i>Jpn J Antibiot</i> 42(7): 1593-1606.                                                                                              | Title    |
| 385 | Kinasewitz, G. and R. G. Wood (1991). "Azithromycin versus cefaclor in the treatment of acute bacterial pneumonia." <i>European journal of clinical microbiology &amp; infectious diseases</i> 10(10): 872-877.                                                           | Title    |
| 386 | Kirby, W. M. and C. Regamey (1973). "Pharmacokinetics of cefazolin compared with four other cephalosporins." <i>J Infect Dis</i> 128: Suppl:S341-346.                                                                                                                     | Title    |

|     |                                                                                                                                                                                                                                                                                                                                                                             |          |
|-----|-----------------------------------------------------------------------------------------------------------------------------------------------------------------------------------------------------------------------------------------------------------------------------------------------------------------------------------------------------------------------------|----------|
| 387 | Kiss, I. J., et al. (1976). "Serum and lung tissue levels of cephradine in thoracic surgery." Br J Clin Pharmacol 3(5): 891-895.                                                                                                                                                                                                                                            | Title    |
| 388 | Kitaura, T., et al. (1989). "Ocular pharmacokinetics of latamoxef and cefaclor in humans. Penetration into aqueous humor." J Pharmacobiodyn 12(1): 60-66.                                                                                                                                                                                                                   | Title    |
| 389 | Klimova, V. S. and V. P. Iakovlev (1979). "[Comparative study of the interaction of cephalosporins with blood serum proteins and organ homogenates]." Antibiotiki 24(11): 835-838.                                                                                                                                                                                          | Title    |
| 390 | Klixbüll, U. and H. Bundgaard (1984). "Prodrugs as drug delivery systems. XXX. 4-Imidazolidinones as potential bioreversible derivatives for the $\alpha$ -aminoamide moiety in peptides." Int J Pharm 20(3): 273-284.                                                                                                                                                      | Title    |
| 391 | Kobayashi, H., et al. (1986). "Comparative clinical study of T-2588 and cefaclor in chronic respiratory tract infections by a double-blind method." Kansenshogaku Zasshi 60(9): 1052-1077.                                                                                                                                                                                  | Title    |
| 392 | Kodaira, H., et al. (2011). "Quantitative evaluation of the impact of active efflux by p-glycoprotein and breast cancer resistance protein at the blood-brain barrier on the predictability of the unbound concentrations of drugs in the brain using cerebrospinal fluid concentration as a surrogate." Journal of Pharmacology Experimental Therapeutics 339(3): 935-944. | Title    |
| 393 | Komarova, V. P., et al. (1997). "[Treatment of lower respiratory tract infections in the elderly]." Antibiot Khimioter 42(12): 19-24.                                                                                                                                                                                                                                       | Title    |
| 394 | Koot, M. J., et al. (1992). "High pressure liquid chromatographic analysis of the serum concentration of cefuroxime after an intravenous bolus injection of cefuroxime in patients with a coronary artery bypass grafting." Pharm Weekbl Sci 14(6): 360-364.                                                                                                                | Title    |
| 395 | Korzeniowski, O. M., et al. (1977). "Comparative pharmacology of cefaclor and cephalixin." Antimicrob Agents Chemother 12(2): 157-162.                                                                                                                                                                                                                                      | Title    |
| 396 | Kovach, P. M., et al. (1991). "High-performance liquid chromatographic determination of loracarbef, a potential metabolite, cefaclor and cephalixin in human plasma, serum and urine." Journal of Chromatography B: Biomedical Sciences and Applications 567(1): 129-139.                                                                                                   | Abstract |
| 397 | Koytchev, R., et al. (2004). "Studies on the bioequivalence of second generation cephalosporins: cefaclor capsules and suspension." Arzneimittelforschung 54(9a): 583-587.                                                                                                                                                                                                  | Title    |
| 398 | Kramer, W., et al. (1999). "Substrate specificity of the ileal and the hepatic Na <sup>+</sup> /bile acid cotransporters of the rabbit. I. Transport studies with membrane vesicles and cell lines expressing the cloned transporters." Journal of Lipid Research 40(9): 1604-1617.                                                                                         | Animal   |
| 399 | Kramer, W., et al. (1997). "Modified bile acids as carriers for peptides and drugs." Journal of Controlled Release 46(1): 17-30.                                                                                                                                                                                                                                            | Title    |
| 400 | Kratochwil, N. A., et al. (2002). "Predicting plasma protein binding of drugs: a new approach." Biochem Pharmacol 64(9): 1355-1374.                                                                                                                                                                                                                                         | Title    |

|     |                                                                                                                                                                                                                                                                                       |       |
|-----|---------------------------------------------------------------------------------------------------------------------------------------------------------------------------------------------------------------------------------------------------------------------------------------|-------|
| 401 | Kubbinga, M., et al. (2019). "The effect of chitosan on the bioaccessibility and intestinal permeability of acyclovir." <i>European Journal of Pharmaceutics and Biopharmaceutics</i> 136: 147-155.                                                                                   | Title |
| 402 | Kudo, Y., et al. (1989). "Carrier-mediated transport system for cephalexin in human placental brush-border membrane vesicles." <i>Biochim Biophys Acta</i> 978(2): 313-318.                                                                                                           | Title |
| 403 | Kuemmerle, H. P. (1985). "New perspectives in oral antibiotic therapy: cefatrizine. Conclusions." <i>Drugs Exp Clin Res</i> 11(7): 461.                                                                                                                                               | Title |
| 404 | Kulapina, O. I. and A. M. Vostrikova (2014). "[Rapid determination of cephalexin in biological media]." <i>Antibiot Khimioter</i> 59(1-2): 6-9.                                                                                                                                       | Title |
| 405 | Kumar, K., et al. (2020). "Formulation, characterization and evaluation to establish the bioavailability of gastroretentive mucoadhesive dosage of atenolol in human subjects with possible in-vitro-in-vivo correlation." <i>Iranian Journal of Pharmaceutical Sciences</i> : 53-70. | Title |
| 406 | Kusuhara, H., et al. (2013). "In vivo characterization of interactions on transporters." <i>Transporters in Drug Development: Discovery, Optimization, Clinical Study Regulation</i> : 67-97.                                                                                         | Title |
| 407 | Kwon, H. (2003). Pharmacokinetic/pharmacodynamic modeling/simulation and novel gastric retention formulation, Oregon State University.                                                                                                                                                | Title |
| 408 | La Rosa, F., et al. (1982). "Pharmacokinetics of cefadroxil after oral administration in humans." <i>Antimicrob Agents Chemother</i> 21(2): 320-322.                                                                                                                                  | Title |
| 409 | Lai, X., et al. (2021). "An Open-Label, Randomized, 2-Way, Crossover Bioequivalence Study of Cefradine Capsules in Healthy Chinese Volunteers." <i>Clin Pharmacol Drug Dev</i> 10(12): 1478-1484.                                                                                     | Title |
| 410 | Landowski, C. P. (2005). Designing anticancer prodrugs for targeting drug transporters and activating enzymes, University of Michigan.                                                                                                                                                | Title |
| 411 | Landowski, C. P., et al. (2003). "A fluorescent hPept1 transporter substrate for uptake screening." <i>Pharm Res</i> 20(11): 1738-1745.                                                                                                                                               | Title |
| 412 | Landowski, C. P., et al. (2003). "Gene expression in the human intestine and correlation with oral valacyclovir pharmacokinetic parameters." <i>Journal of Pharmacology Experimental Therapeutics</i> 306(2): 778-786.                                                                | Title |
| 413 | LaPorte, B. and F. M. Musteata (2020). "Influence of Sampling Site and Fluid Flow on the Accuracy of Total Body Clearance Calculation." <i>J Pharm Sci</i> 109(6): 2079-2089.                                                                                                         | Title |
| 414 | Law, M. R., et al. (1983). "Cefaclor and amoxycillin in the treatment of infective exacerbations of chronic bronchitis." <i>Journal of antimicrobial chemotherapy</i> 11(1): 83-88.                                                                                                   | Title |

|     |                                                                                                                                                                                                                             |          |
|-----|-----------------------------------------------------------------------------------------------------------------------------------------------------------------------------------------------------------------------------|----------|
| 415 | Lawrence, X. Y. and G. L. Amidon (1998). "Saturable small intestinal drug absorption in humans: modeling and interpretation of cefatrizine data." <i>European journal of pharmaceutics biopharmaceutics</i> 45(2): 199-203. | Title    |
| 416 | Lee, C. M. (2019). Physiologically-based Pharmacokinetic Modeling of Drugs with Transporter-mediated Disposition: Prediction of Vincristine and Amoxicillin Disposition in Children.                                        | Title    |
| 417 | Lee, C. S. and T. C. Marbury (1984). "Drug therapy in patients undergoing haemodialysis. Clinical pharmacokinetic considerations." <i>Clin Pharmacokinet</i> 9(1): 42-66.                                                   | Title    |
| 418 | Lee, G. S., et al. (1980). "A comparison of cefaclor and ampicillin in the treatment of respiratory infection in elderly in-patients." <i>Curr Med Res Opin</i> 6(8): 564-568.                                              | Title    |
| 419 | Lee, J.-H., et al. (2022). "Oral pharmacokinetic profile and withdrawal time estimation for tylosin tartrate in the cultured olive flounder <i>Paralichthys olivaceus</i> ." <i>Aquaculture Reports</i> 26: 101332.         | Title    |
| 420 | Lee, K. (2000). Novel mechanisms of absorptive and secretory transport of H <sub>2</sub> -antagonists across intestinal epithelium, The University of North Carolina at Chapel Hill.                                        | Title    |
| 421 | Lees, A. S., et al. (1993). "The pharmacokinetics, tissue penetration and in-vitro activity of loracarbef, a beta-lactam antibiotic of the carbacephem class." <i>J Antimicrob Chemother</i> 32(6): 853-859.                | Title    |
| 422 | Leigh, D. A. (1989). "Determination of serum and bone concentrations of cephradine and cefuroxime by HPLC in patients undergoing hip and knee joint replacement surgery." <i>J Antimicrob Chemother</i> 23(6): 877-883.     | Title    |
| 423 | Leitner, F., et al. (1979). "Bactericidal activity of cefadroxil, cephalixin, and cephradine in an in vitro pharmacokinetic model." <i>J Antibiot (Tokyo)</i> 32(7): 718-726.                                               | Abstract |
| 424 | Lennernäs, H. (2014). "Human in vivo regional intestinal permeability: importance for pharmaceutical drug development." <i>Molecular Pharmaceutics</i> 11(1): 12-23.                                                        | Title    |
| 425 | Leroy, A., et al. (1981). "[Pharmacokinetics of cefaclor in subjects with normal renal function and in uraemic patients (author's transl)]." <i>Thérapie</i> 36(5): 533-540.                                                | Title    |
| 426 | Leroy, A., et al. (1982). "Pharmacokinetics of cefadroxil in patients with impaired renal function." <i>J Antimicrob Chemother</i> 10 Suppl B: 39-46.                                                                       | Title    |
| 427 | Levin, L. A., et al. (1996). "The spectrum of orbital aspergillosis: a clinicopathological review." <i>Survey of Ophthalmology</i> 41(2): 142-154.                                                                          | Title    |



|     |                                                                                                                                                                                                                                     |        |
|-----|-------------------------------------------------------------------------------------------------------------------------------------------------------------------------------------------------------------------------------------|--------|
| 428 | Levine, L. R. (1985). "Quantitative comparison of adverse reactions to cefaclor vs. amoxicillin in a surveillance study." <i>Pediatric infectious disease</i> 4(4): 358-361.                                                        | Title  |
| 429 | Levison, M. E., et al. (1979). "In vitro activity and pharmacokinetics of cefaclor in normal volunteers and patients with renal failure." <i>Postgrad Med J</i> 55 Suppl 4: 12-16.                                                  | Title  |
| 430 | Li, F., et al. (2006). "Transport of levovirin prodrugs in the human intestinal Caco-2 cell line." <i>J Pharm Sci</i> 95(6): 1318-1325.                                                                                             | Title  |
| 431 | Li, J. and I. J. Hidalgo (1996). "Molecular modeling study of structural requirements for the oligopeptide transporter." <i>J Drug Target</i> 4(1): 9-17.                                                                           | Title  |
| 432 | Li, J. and I. J. Hidalgo (2019). The evolving role of the Caco-2 cell model to estimate intestinal absorption potential and elucidate transport mechanisms. <i>Drug Discovery and Development</i> , CRC Press: 333-357.             | Title  |
| 433 | Li, J., et al. (1998). "Structure-affinity relationships of Val-Val and Val-Val-Val stereoisomers with the apical oligopeptide transporter in human intestinal Caco-2 cells." <i>J Drug Target</i> 5(5): 317-327.                   | Title  |
| 434 | Li, M., et al. (2009). "Effects of cranberry juice on pharmacokinetics of beta-lactam antibiotics following oral administration." <i>Antimicrob Agents Chemother</i> 53(7): 2725-2732.                                              | Title  |
| 435 | Li, Y. (2001). Mechanisms of region-dependent absorption of a weakly basic hiv protease inhibitor, indinavir: clinical ramifications and comparison with nelfinavir, University of Michigan.                                        | Title  |
| 436 | Liang, L. M., et al. (2020). "Diabetes downregulates peptide transporter 1 in the rat jejunum: possible involvement of cholate-induced FXR activation." <i>Acta Pharmacol Sin</i> 41(11): 1465-1475.                                | Animal |
| 437 | Lildholdt, T., et al. (1981). "Pharmacokinetics of cefaclor in chronic middle ear effusions." <i>Ann Otol Rhinol Laryngol Suppl</i> 90(3 Pt 3): 44-47.                                                                              | Title  |
| 438 | Lin, Y. T., et al. (2002). "Prophylactic antibiotics in cirrhotics with upper gastrointestinal hemorrhage: a prospective, controlled trial." <i>Zhonghua yi xue za zhi [Chinese medical journal; Free China ed]</i> 65(8): 365-371. | Title  |
| 439 | Linnankoski, J., et al. (2008). "Passive oral drug absorption can be predicted more reliably by experimental than computational models—Fact or myth." <i>European Journal of Pharmaceutical Sciences</i> 34(2): 129-139.            | Title  |
| 440 | Lipsky, B. A., et al. (1999). "Sparfloxacin versus ciprofloxacin for the treatment of community-acquired, complicated skin and skin-structure infections." <i>Clin Ther</i> 21(4): 675-690.                                         | Title  |

|     |                                                                                                                                                                                                                                                                   |           |
|-----|-------------------------------------------------------------------------------------------------------------------------------------------------------------------------------------------------------------------------------------------------------------------|-----------|
| 441 | LiPuma, J. J. and T. L. Stull (1995). "ANTIBACTERIAL AGENTS IN PEDIATRICS." Infectious Disease Clinics of North America 9(3): 561-574.                                                                                                                            | Title     |
| 442 | Litvak, A. S., et al. (1976). "Cefazolin and cephalixin levels in prostatic tissue and sera." Urology 7(5): 497-499.                                                                                                                                              | Abstract  |
| 443 | Liu, M., et al. (2016). "An LC-MS/MS method for simultaneous determination of cefprozil diastereomers in human plasma and its application for the bioequivalence study of two cefprozil tablets in healthy Chinese volunteers." Biomed Chromatogr 30(3): 288-293. | Title     |
| 444 | Liu, Z., et al. (2011). "Uptake, transport and regulation of JBP485 by PEPT1 in vitro and in vivo." Peptides 32(4): 747-754.                                                                                                                                      | Title     |
| 445 | Lode, H. (2010). "Safety and Tolerability of Commonly Prescribed Oral Antibiotics for the Treatment of Respiratory Tract Infections." The American Journal of Medicine 123(4, Supplement): S26-S38.                                                               | Title     |
| 446 | Lode, H., et al. (1973). "[Oral antibiotic therapy in gastrectomized patients]." Verh Dtsch Ges Inn Med 79: 837-839.                                                                                                                                              | Title     |
| 447 | Lode, H., et al. (1975). "Comparative pharmacokinetics and clinical experience with a new cephalosporin-derivative: cefazolin." Chemotherapy 21(1): 19-32.                                                                                                        | Title     |
| 448 | Lode, H., et al. (1979). "[Pharmacokinetics of cefaclor and initial therapeutical experience (author's transl)]." Infection 7 Suppl 6: 600-605.                                                                                                                   | Title     |
| 449 | Lode, H., et al. (1980). "[Comparative pharmacokinetics of oral cephalosporins: cephalixin, cefaclor and cefadroxil (author's transl)]." Arzneimittelforschung 30(3): 505-509.                                                                                    | Full text |
| 450 | Lowther, J., et al. (1990). "Uptake of cephalosporins by human intestinal brush-border membrane vesicles." J Antimicrob Chemother 25(1): 183-184.                                                                                                                 | Title     |
| 451 | Lu, H., et al. (2006). "Enantiomer–enantiomer interaction of ifosfamide in the rat." Xenobiotica 36(6): 535-549.                                                                                                                                                  | Animal    |
| 452 | Lu, W., et al. (2008). "Modulation of brain delivery and copulation by intranasal apomorphine hydrochloride." Int J Pharm 349(1): 196-205.                                                                                                                        | Title     |
| 453 | Lu, W.-Y., et al. (2021). "Application of marine natural products in drug research." Bioorg Med Chem 35: 116058.                                                                                                                                                  | Title     |
| 454 | Ma, J., et al. (2010). "Effects of cefaclor on gastric emptying and cholecystokinin release in healthy humans." Regulatory peptides 159(1-3): 156-159.                                                                                                            | Title     |
| 455 | Ma, K. (2010). Role, Relevance and Regulation of PEPT1 in Peptide Intestinal Absorption.                                                                                                                                                                          | Title     |
| 456 | Madubala, P. (2020). Formulation and Evaluation of Floating Drug Delivey System of Famotidine, PGP College of Pharmaceutical Science and Research Institute, Namakkal.                                                                                            | Title     |

|     |                                                                                                                                                                                                                                         |        |
|-----|-----------------------------------------------------------------------------------------------------------------------------------------------------------------------------------------------------------------------------------------|--------|
| 457 | Manda, P., et al. (2016). "Delivery of ziconotide to cerebrospinal fluid via intranasal pathway for the treatment of chronic pain." Journal of Controlled Release 224: 69-76.                                                           | Title  |
| 458 | Mansmann, H. C. (1980). "THE EVALUATION, CONTROL, AND MODIFICATION OF CONTINUING ASTHMA." Clinics in Chest Medicine 1(3): 339-360.                                                                                                      | Title  |
| 459 | Marcon, M. J. and R. C. Bartlett (1983). "Laboratory evaluation of the serum dilution test in serious staphylococcal infection." Am J Clin Pathol 80(2): 176-181.                                                                       | Title  |
| 460 | Marino, A. M., et al. (1996). "Distribution of the dipeptide transporter system along the gastrointestinal tract of rats based on absorption of a stable and specific probe, SQ-29852." J Pharm Sci 85(3): 282-286.                     | Animal |
| 461 | Mariño, E. L. and A. Dominguez-Gil (1980). "Influence of dose on the pharmacokinetics of cefadroxil." Eur J Clin Pharmacol 18(6): 505-509.                                                                                              | Title  |
| 462 | Mariño, E. L. and A. Dominguez-Gil (1981). "The pharmacokinetics of cefadroxil associated with probenecid." Int J Clin Pharmacol Ther Toxicol 19(11): 506-508.                                                                          | Title  |
| 463 | Mariño, E. L., et al. (1982). "Influence of dosage form and administration route on the pharmacokinetic parameters of cefadroxil." Int J Clin Pharmacol Ther Toxicol 20(2): 73-77.                                                      | Title  |
| 464 | Marshall, B. C. and W. M. Samuelson (1998). "BASIC THERAPIES IN CYSTIC FIBROSIS: Does Standard Therapy Work?" Clinics in Chest Medicine 19(3): 487-504.                                                                                 | Title  |
| 465 | Martea, M., et al. (1987). "Pharmacokinetics of cefradine, sulfamethoxazole and trimethoprim and their metabolites in a patient with peritonitis undergoing continuous ambulatory peritoneal dialysis." Pharm Weekbl Sci 9(2): 110-116. | Title  |
| 466 | Martinez, M. N. and M. G. Papich (2009). "Factors Influencing the Gastric Residence of Dosage Forms in Dogs." J Pharm Sci 98(3): 844-860.                                                                                               | Animal |
| 467 | Marzo, A. and E. Heftmann (2002). "Enantioselective analytical methods in pharmacokinetics with specific reference to genetic polymorphic metabolism." Journal of Biochemical and Biophysical Methods 54(1): 57-70.                     | Title  |
| 468 | Masahiro, N., et al. (1980). "Sustained urinary excretion of sulfamethizole following oral administration of enteric coated microcapsules in humans." Int J Pharm 4(4): 291-298.                                                        | Title  |
| 469 | Mason, I. S. and M. Kietzmann (1999). "Cephalosporins - pharmacological basis of clinical use in veterinary dermatology." Vet Dermatol 10(3): 187-192.                                                                                  | Title  |

|     |                                                                                                                                                                                                                                                             |          |
|-----|-------------------------------------------------------------------------------------------------------------------------------------------------------------------------------------------------------------------------------------------------------------|----------|
| 470 | Mastrandrea, V., et al. (1985). "Pharmacokinetics of cefatrizine after oral administration in human volunteers." <i>Int J Clin Pharmacol Res</i> 5(5): 319-323.                                                                                             | Title    |
| 471 | Matsumoto, S., et al. (1994). "Transcellular transport of oral cephalosporins in human intestinal epithelial cells, Caco-2: interaction with dipeptide transport systems in apical and basolateral membranes." <i>J Pharmacol Exp Ther</i> 270(2): 498-504. | Title    |
| 472 | Matsunaga, T., et al. (1987). "A parallel comparative double blind study of cefixime with cefroxadine in the treatment of acute lacunar tonsillitis." <i>Japanese journal of antibiotics</i> 40(1): 25-54.                                                  | Title    |
| 473 | Mattioli, F., et al. (2003). "Low plasma cefaclor levels in cystectomized bladder cancer patients with various types of urinary diversion." <i>Eur J Clin Pharmacol</i> 58(10): 715-716.                                                                    | Title    |
| 474 | Mazzei, T. and P. Dentico (2000). "The pharmacokinetics of oral cephalosporins." <i>Clinical Microbiology and Infection</i> 6: 53-54.                                                                                                                       | Abstract |
| 475 | Mazzei, T., et al. (2000). "New insight into the clinical pharmacokinetics of cefaclor: tissue penetration." <i>J Chemother</i> 12(1): 53-62.                                                                                                               | Title    |
| 476 | McCracken, G. H., Jr., et al. (1978). "Pharmacologic evaluation of orally administered antibiotics in infants and children: effect of feeding on bioavailability." <i>Pediatrics</i> 62(5): 738-743.                                                        | Title    |
| 477 | Meimeti, E., et al. (2020). "Ointments containing Ceratothoa oestroides extract: evaluation of their healing potential in the treatment of diabetic foot ulcers." <i>Wound repair and regeneration</i> 28(2): 234-241.                                      | Title    |
| 478 | Meir, D. B. and P. M. Livne (2004). "Is prophylactic antimicrobial treatment necessary after hypospadias repair?" <i>Journal of urology</i> 171(6 Pt 2): 2621-2622.                                                                                         | Title    |
| 479 | Menardi, G. and J. P. Guggenbichler (1984). "Bioavailability of oral antibiotics in children with short-bowel syndrome." <i>J Pediatr Surg</i> 19(1): 84-86.                                                                                                | Title    |
| 480 | Mendelson, J., et al. (1979). "Effect of single and multidose cephradine prophylaxis on infectious morbidity of vaginal hysterectomy." <i>Obstetrics and gynecology</i> 53(1): 31-35.                                                                       | Title    |
| 481 | Meng, F., et al. (2005). "Sensitive liquid chromatography–tandem mass spectrometry method for the determination of cefixime in human plasma: Application to a pharmacokinetic study." <i>Journal of Chromatography B</i> 819(2): 277-282.                   | Title    |
| 482 | Mesina, P., et al. (1984). "[Assay of blood and urinary levels of 2 different solutions of cephalixin for oral administration]." <i>G Batteriol Virol Immunol</i> 77(7-12): 137-144.                                                                        | Abstract |
| 483 | Meunier, V., et al. (1995). "The human intestinal epithelial cell line Caco-2; pharmacological and pharmacokinetic applications." <i>Cell biology toxicology</i> 11: 187-194.                                                                               | Title    |

|     |                                                                                                                                                                                                                                |          |
|-----|--------------------------------------------------------------------------------------------------------------------------------------------------------------------------------------------------------------------------------|----------|
| 484 | Meyers, B. R. (2000). "Cefaclor revisited." Clin Ther 22(2): 154-166.                                                                                                                                                          | Title    |
| 485 | Miao, L., et al. (2020). "Using a physiologically based pharmacokinetic absorption model to establish dissolution bioequivalence safe space for oseltamivir in adult and pediatric populations." The AAPS Journal 22: 1-10.    | Title    |
| 486 | Middlehurst, R. J., et al. (1989). "Cephadrine penetration of mandibular bone." J Oral Maxillofac Surg 47(7): 672-673.                                                                                                         | Title    |
| 487 | Midtvedt, T. (1992). Penicillins, cephalosporins and tetracyclines. Side Effects of Drugs Annual. M. N. G. Dukes and J. K. Aronson, Elsevier. 16: 262-272.                                                                     | Title    |
| 488 | Minn, F. L., et al. (1976). "Cephadrine excretion in humans with pH-altered urine." J Clin Pharmacol 16(4): 171-173.                                                                                                           | Title    |
| 489 | Miret, S., et al. (2004). "Comparison of in vitro models for the prediction of compound absorption across the human intestinal mucosa." J Biomol Screen 9(7): 598-606.                                                         | Title    |
| 490 | Miyazaki, K., et al. (1983). "Determination of ampicillin, amoxicillin, cephalixin, and cephradrine in plasma by high-performance liquid chromatography using fluorometric detection." J Chromatogr 276(2): 478-482.           | Title    |
| 491 | Moatti, N., et al. (1978). "[Human lung tissue and serum concentrations of cefradin (author's transl)]." Pathol Biol (Paris) 26(9-10): 577-580.                                                                                | Title    |
| 492 | Modr, Z., et al. (1982). "[Pharmacokinetics of cephradrine]." Cesk Farm 31(5): 153-158.                                                                                                                                        | Title    |
| 493 | Mogabgab, W. J. (1976). "Parenteral use of cephradrine in the treatment of lower respiratory tract infections: results of two studies." Curr Ther Res Clin Exp 20(3): 241-253.                                                 | Title    |
| 494 | Molokhia, A. M. (1984). "Effect of storage on the bioavailability of cephalixin from its capsules." Res Commun Chem Pathol Pharmacol 45(2): 219-224.                                                                           | Abstract |
| 495 | Moore, K., et al. (2019). "Double blind, placebo-controlled trial of antibiotics in women with refractory detrusor overactivity: effect on urge incontinence and quality of life." Neurourology and urodynamics 38: S120-S121. | Title    |
| 496 | MORENO, L., et al. (2009). FOOD SAFETY AND DRUG RESIDUES.                                                                                                                                                                      | Title    |
| 497 | Morihana, T., et al. (1980). "[Fundamental and clinical studies of sustained release cephalixin (L-Keflex) in the field of oral surgery (author's transl)]." Jpn J Antibiot 33(4): 514-521.                                    | Abstract |
| 498 | Morimoto, K., et al. (2011). "Effect of Milk on the Pharmacokinetics of Oseltamivir in Healthy Volunteers." J Pharm Sci 100(9): 3854-3861.                                                                                     | Title    |

|     |                                                                                                                                                                                                                                                                   |       |
|-----|-------------------------------------------------------------------------------------------------------------------------------------------------------------------------------------------------------------------------------------------------------------------|-------|
| 499 | Morrison, R. A., et al. (1996). "Suitability of enalapril as a probe of the dipeptide transporter system: in vitro and in vivo studies." <i>Pharm Res</i> 13(7): 1078-1082.                                                                                       | Title |
| 500 | Morse, D. R., et al. (1990). "A comparison of erythromycin and cefadroxil in the prevention of flare-ups from asymptomatic teeth with pulpal necrosis and associated periapical pathosis." <i>Oral surgery, oral medicine, and oral pathology</i> 69(5): 619-630. | Title |
| 501 | Motohiro, T., et al. (1992). "[Pharmacokinetic and clinical studies on cefprozil granules in the pediatric field]." <i>Jpn J Antibiot</i> 45(12): 1700-1735.                                                                                                      | Title |
| 502 | Motohiro, T., et al. (1992). "Clinical studies on cefprozil granules in pediatric skin soft tissues infections." <i>Japanese journal of antibiotics</i> 45(12): 1684-1699.                                                                                        | Title |
| 503 | Motohiro, T., et al. (1989). "[Pharmacokinetic and clinical studies on cefpodoxime proxetil dry syrup in the field of pediatrics]." <i>Jpn J Antibiot</i> 42(7): 1629-1666.                                                                                       | Title |
| 504 | Motohiro, T., et al. (1988). "[Pharmacokinetic and clinical studies of sultamicillin granule in the pediatric field]." <i>Jpn J Antibiot</i> 41(12): 1980-2000.                                                                                                   | Title |
| 505 | Motohiro, T., et al. (1981). "[Absorption, excretion and clinical trials of cefroxadine in the field of pediatrics (author's transl)]." <i>Jpn J Antibiot</i> 34(12): 1703-1731.                                                                                  | Title |
| 506 | Motohiro, T., et al. (1983). "[Clinical studies on cefadroxil in the field of pediatrics]." <i>Jpn J Antibiot</i> 36(1): 93-102.                                                                                                                                  | Title |
| 507 | Motohiro, T., et al. (1989). "[Pharmacokinetic and clinical studies of ceftoram pivoxil granule in the pediatric field]." <i>Jpn J Antibiot</i> 42(9): 2023-2061.                                                                                                 | Title |
| 508 | Muijsers, R. B. R. and B. Jarvis (2002). "Moxifloxacin: in uncomplicated skin and skin structure infections." <i>Drugs</i> 62(6): 967-973.                                                                                                                        | Title |
| 509 | Muranushi, N., et al. (1994). "Characteristics of ceftibuten uptake into Caco-2 cells." <i>Pharm Res</i> 11(12): 1761-1765.                                                                                                                                       | Title |
| 510 | Mustafa, M. M. and G. H. McCracken (1989). "Antimicrobial Agents in Pediatrics." <i>Infectious Disease Clinics of North America</i> 3(3): 491-506.                                                                                                                | Title |
| 511 | Muth, P., et al. (1996). "Improved high-performance liquid chromatographic determination of amoxicillin in human plasma by means of column switching." <i>J Chromatogr A</i> 729(1-2): 259-266.                                                                   | Title |
| 512 | Naber, K. and T. Ahrens (1980). "Dynamics of initial antibacterial effects in the treatment of bacteriuria." <i>Urological research</i> 8(4): 231.                                                                                                                | Title |
| 513 | Naber, K. and W. Kaldewey (1979). "Comparative study of cefaclor versus amoxicillin in urinary tract infections (author's transl)." <i>Infection</i> 7 Suppl 6: 617-621.                                                                                          | Title |

|     |                                                                                                                                                                                                     |          |
|-----|-----------------------------------------------------------------------------------------------------------------------------------------------------------------------------------------------------|----------|
| 514 | Naber, K. G. and T. Ahrens (1982). "Cefroxadine and cephalixin in urinary tract infections. Kinetics of germ elimination." Fortschritte der Medizin 100(39): 1827-1831.                             | Abstract |
| 515 | Nadai, M., et al. (2006). "Effect of chitosan on gastrointestinal absorption of water-insoluble drugs following oral administration in rats." Biological Pharmaceutical Bulletin 29(9): 1941-1946.  | Animal   |
| 516 | Nagpal, V. and R. Saha "INTRANASAL DELIVERY-OPPORTUNITIES FOR SYSTEMIC AND BRAIN TARGETING." Drug delivery and translational research.                                                              | Title    |
| 517 | Nahata, M. C., et al. (1983). "Decreased absorption of cefaclor in short bowel syndrome." Drug Intell Clin Pharm 17(3): 201-202.                                                                    | Title    |
| 518 | Nahata, M. C., et al. (1990). "Cefadroxil kinetics and dynamics in a pediatric patient with acute osteomyelitis." Chemotherapy 36(6): 392-395.                                                      | Title    |
| 519 | Najib, N., et al. (1987). "High performance liquid chromatographic analysis of cephalixin in serum and urine." Journal of clinical pharmacy therapeutics 12(6): 419-426.                            | Abstract |
| 520 | Najjar, T. A., et al. (2009). "Mechanism and implication of cephalosporin penetration into oropharyngeal mucosa." J Infect Chemother 15(2): 70-74.                                                  | Abstract |
| 521 | Nakamura, K., et al. (2021). "Pharmacologic therapy for engraftment arrhythmia induced by transplantation of human cardiomyocytes." Stem Cell Reports 16(10): 2473-2487.                            | Title    |
| 522 | Nakashima, S., et al. (2022). "Effect of Excessive Serotonin on Pharmacokinetics of Cephalixin after Oral Administration: Studies with Serotonin-Excessive Model Rats." Pharm Res 39(9): 2163-2178. | Animal   |
| 523 | Nakazawa, S., et al. (1981). "[Clinical studies with cefroxadine dry syrup in the field of pediatrics (author's transl)]." Jpn J Antibiot 34(12): 1588-1594.                                        | Title    |
| 524 | Nasrollahzadeh, M., et al. (2022). "Drug in adhesive transdermal patch containing antibiotic-loaded solid lipid nanoparticles." J Biosci Bioeng 134(5): 471-476.                                    | Title    |
| 525 | Nation, R. L., et al. (2014). "Pharmacokinetics and pharmacodynamics of colistin." Fundamentals of Antimicrobial Pharmacokinetics Pharmacodynamics: 351-380.                                        | Title    |
| 526 | Naumann, P. (1975). "[Cephalosporin antibiotics from microbiologic viewpoint. A comparison of antibacterial and pharmacokinetic properties]." Int J Clin Pharmacol Biopharm 11(2): 85-92.           | Title    |

|     |                                                                                                                                                                                                                                              |          |
|-----|----------------------------------------------------------------------------------------------------------------------------------------------------------------------------------------------------------------------------------------------|----------|
| 527 | Naumann, P. and E. Reintjens (1974). "Antibacterial activity and pharmacokinetic behavior of cefazolin as compared with five other cephalosporin antibiotics." Infection 2(1): 19-24.                                                        | Title    |
| 528 | Nct (2005). "The Impact of Treating Staphylococcus Aureus Infection and Colonization on the Clinical Severity of Atopic Dermatitis." <a href="https://clinicaltrials.gov/show/NCT00179959">https://clinicaltrials.gov/show/NCT00179959</a> . | Title    |
| 529 | Nct (2006). "Pediatric Fingertip Injuries: are Antibiotics Required?" <a href="https://clinicaltrials.gov/show/NCT00300092">https://clinicaltrials.gov/show/NCT00300092</a> .                                                                | Title    |
| 530 | Nct (2011). "Generic Formulations of Commonly-used Oral Drugs in Saudi Arabia: interchangeability & Post-marketing Quality." <a href="https://clinicaltrials.gov/show/NCT01344070">https://clinicaltrials.gov/show/NCT01344070</a> .         | Title    |
| 531 | Nct (2011). "The Placebo Effect May Involve Modulating Drug Bioavailability." <a href="https://clinicaltrials.gov/show/NCT01501747">https://clinicaltrials.gov/show/NCT01501747</a> .                                                        | Title    |
| 532 | Nct (2011). "Safety and Efficacy Study of Ceftaroline Versus a Comparator in Pediatric Subjects With Complicated Skin Infections." <a href="https://clinicaltrials.gov/show/NCT01400867">https://clinicaltrials.gov/show/NCT01400867</a> .   | Title    |
| 533 | Nct (2012). "Use of a Single Dose of Oral Prednisone in the Treatment of Cellulitis." <a href="https://clinicaltrials.gov/show/NCT01671423">https://clinicaltrials.gov/show/NCT01671423</a> .                                                | Title    |
| 534 | Nct (2013). "Bioequivalence Study of Cephalexin Suspension 125." <a href="https://clinicaltrials.gov/show/NCT01767532">https://clinicaltrials.gov/show/NCT01767532</a> .                                                                     | Abstract |
| 535 | Nct (2013). "Bioequivalence Study of Cephalexin Suspension 250." <a href="https://clinicaltrials.gov/show/NCT01767571">https://clinicaltrials.gov/show/NCT01767571</a> .                                                                     | Abstract |
| 536 | Nct (2013). "Bioequivalence Study of Cephalexin Tablets 1g." <a href="https://clinicaltrials.gov/show/NCT01767584">https://clinicaltrials.gov/show/NCT01767584</a> .                                                                         | Abstract |
| 537 | Nct (2013). "Therapeutic Equivalence Between Branded and Generic WARFARin Tablets in Brazil." <a href="https://clinicaltrials.gov/show/NCT02017197">https://clinicaltrials.gov/show/NCT02017197</a> .                                        | Title    |
| 538 | Nct (2014). "Anti-TNF $\alpha$ Use During Elective Foot and Ankle Surgery in Patients With Rheumatoid Arthritis." <a href="https://clinicaltrials.gov/show/NCT02242474">https://clinicaltrials.gov/show/NCT02242474</a> .                    | Title    |
| 539 | Nct (2014). "To Assess the Effect of AZD1722 on the Pharmacokinetics of Cefadroxil in Healthy Volunteers." <a href="https://clinicaltrials.gov/show/NCT02140281">https://clinicaltrials.gov/show/NCT02140281</a> .                           | Title    |
| 540 | Nct (2015). "A Bioequivalence Study of Cefadroxil From Duricef 1 gm F.C.T (GSK) and Biodroxil 1 gm F.C.T (Novartis Pharma)." <a href="https://clinicaltrials.gov/show/NCT02479867">https://clinicaltrials.gov/show/NCT02479867</a> .         | Title    |
| 541 | Nct (2017). "Impact of Antibiotic Treatment Following Implantation of Cardiac Electronic Device on Patient's Outcome." <a href="https://clinicaltrials.gov/show/NCT03148444">https://clinicaltrials.gov/show/NCT03148444</a> .               | Title    |
| 542 | Nct (2019). "Cefadroxil and Cephalexin Drug Levels and Dosing in Pediatric Musculoskeletal Infections." <a href="https://clinicaltrials.gov/show/NCT03802552">https://clinicaltrials.gov/show/NCT03802552</a> .                              | Title    |



|     |                                                                                                                                                                                                                                                   |          |
|-----|---------------------------------------------------------------------------------------------------------------------------------------------------------------------------------------------------------------------------------------------------|----------|
| 543 | Nct (2022). "3-day IV Antibiotic Treatment Versus 3-day IV Followed by 7-day Oral Antibiotic Treatment for AP in Children." <a href="https://clinicaltrials.gov/show/NCT05544565">https://clinicaltrials.gov/show/NCT05544565</a> .               | Title    |
| 544 | Nct (2023). "Single Dose Aminoglycosides for Acute Uncomplicated Cystitis in the Emergency Department Setting." <a href="https://clinicaltrials.gov/show/NCT05702762">https://clinicaltrials.gov/show/NCT05702762</a> .                           | Title    |
| 545 | Nelson, J. D., et al. (1981). "Concentrations of antimicrobial agents in middle ear fluid, saliva and tears." <i>International journal of pediatric otorhinolaryngology</i> 3(4): 327-334.                                                        | Title    |
| 546 | Nelson, J. D., et al. (1978). "Oral antibiotic therapy for skeletal infections of children. I. Antibiotic concentrations in suppurative synovial fluid." <i>Journal of pediatrics</i> 92(1): 131-134.                                             | Title    |
| 547 | Neuhaus, F. C. and W. P. Hammes (1981). "Inhibition of cell wall biosynthesis by analogues of alanine." <i>Pharmacology &amp; Therapeutics</i> 14(3): 265-319.                                                                                    | Title    |
| 548 | Nguyen, H. M. and C. J. Graber (2020). "A Critical Review of Cephalexin and Cefadroxil for the Treatment of Acute Uncomplicated Lower Urinary Tract Infection in the Era of "Bad Bugs, Few Drugs"." <i>Int J Antimicrob Agents</i> 56(4): 106085. | Animal   |
| 549 | Nicklin, P. L., et al. (1996). "Uptake and transport of the ACE-inhibitor ceronapril (SQ 29852) by monolayers of human intestinal absorptive (Caco-2) cells in vitro." <i>Int J Pharm</i> 140(2): 175-183.                                        | Title    |
| 550 | Nies, A. T., et al. (2016). "Structure and function of multidrug and toxin extrusion proteins (MATEs) and their relevance to drug therapy and personalized medicine." <i>Arch Toxicol</i> 90(7): 1555-1584.                                       | Title    |
| 551 | Nies, A. T., et al. (2012). "Multidrug and toxin extrusion proteins as transporters of antimicrobial drugs." <i>Expert Opin Drug Metab Toxicol</i> 8(12): 1565-1577.                                                                              | Title    |
| 552 | Nies, B. A. (1989). "Comparative activity of cefixime and cefaclor in an in vitro model simulating human pharmacokinetics." <i>Eur J Clin Microbiol Infect Dis</i> 8(6): 558-561.                                                                 | Title    |
| 553 | Nieto, M. J., et al. (1983). "Elimination of cefroxadine (CGP-9000) from patients undergoing dialysis." <i>Eur J Clin Pharmacol</i> 24(1): 109-112.                                                                                               | Title    |
| 554 | Nightingale, C. (1980). "Pharmacokinetics of the oral cephalosporins in adults." <i>J Int Med Res</i> 8(Suppl 1): 2-8.                                                                                                                            | Abstract |
| 555 | Nightingale, C. H., et al. (1975). "Pharmacokinetics and clinical use of cephalosporin antibiotics." <i>J Pharm Sci</i> 64(12): 1899-1926.                                                                                                        | Abstract |
| 556 | Nishimura, H., et al. (1969). "[Experimental evaluation of cephalexin (Lilly), a new cephalosporin C antibiotic. 2. Biological assay, absorption and excretion]." <i>Saishin Igaku</i> 24(9): 1983-1989.                                          | Abstract |

|     |                                                                                                                                                                                                                             |          |
|-----|-----------------------------------------------------------------------------------------------------------------------------------------------------------------------------------------------------------------------------|----------|
| 557 | Nishimura, T., et al. (1981). "[Laboratory and clinical studies of cefroxadine (author's transl)]." Jpn J Antibiot 34(12): 1634-1646.                                                                                       | Title    |
| 558 | Nishizawa, K., et al. (2019). "Changes of drug pharmacokinetics mediated by downregulation of kidney organic cation transporters Mate1 and Oct2 in a rat model of hyperuricemia." 14(4): e0214862.                          | Animal   |
| 559 | Nix, D. E., et al. (1997). "Comparative pharmacokinetics of oral ceftibuten, cefixime, cefaclor, and cefuroxime axetil in healthy volunteers." Pharmacotherapy 17(1): 121-125.                                              | Title    |
| 560 | Nolen, T. (1994). "Comparative studies of cefprozil in the management of skin and soft-tissue infections." Eur J Clin Microbiol Infect Dis 13(10): 866-871.                                                                 | Title    |
| 561 | Nordt, S. P., et al. (1999). "Anaphylactic reaction to dermal exposure to cephalexin." Am J Emerg Med 17(5): 492-493.                                                                                                       | Abstract |
| 562 | Nuñez-Vergara, L. J., et al. (1991). "Drug-acetaldehyde interactions during ethanol metabolism in vitro." Alcohol Alcohol 26(2): 139-146.                                                                                   | Title    |
| 563 | Nungu, K. S., et al. (1995). "Bone and wound fluid concentrations of cephalosporins. Oral cefadroxil and parenteral cefuroxime compared in 52 patients with a trochanteric fracture." Acta Orthop Scand 66(2): 161-165.     | Title    |
| 564 | Ocheltree, S. M. (2005). The role and relevance of proton-coupled oligopeptide transporters in multiple organ systems: Implications for the regional and systemic disposition of peptides/mimetics, University of Michigan. | Title    |
| 565 | Oguma, T., et al. (1991). "Pharmacokinetic analysis of the effects of different foods on absorption of cefaclor." Antimicrob Agents Chemother 35(9): 1729-1735.                                                             | Title    |
| 566 | Ohkawa, M., et al. (1981). "Pharmacokinetics of cefroxadine in healthy volunteers and patients with impaired renal function." Chemotherapy 27(3): 149-154.                                                                  | Title    |
| 567 | Ohnhaus, E. E., et al. (1981). "Estimation of the biliary excretion of different cephalosporins utilizing retrograde cholangio-pancreatography (ERCP)." Endoscopy 13(1): 31-32.                                             | Title    |
| 568 | Okamura, M., et al. (2003). "Inhibitory effect of zinc on PEPT1-mediated transport of glycylsarcosine and beta-lactam antibiotics in human intestinal cell line Caco-2." Pharm Res 20(9): 1389-1393.                        | Title    |
| 569 | Oliveira, C. H., et al. (2000). "Comparative bioavailability of two cefadroxil formulations in healthy human volunteers after a single-dose administration." Biopharm Drug Dispos 21(6): 243-247.                           | Title    |
| 570 | Orsolini, P. (1970). "Tissue distribution and serum levels of cephalexin in man." Postgrad Med J: Suppl:13-16.                                                                                                              | Abstract |

|     |                                                                                                                                                                                                                                                                              |          |
|-----|------------------------------------------------------------------------------------------------------------------------------------------------------------------------------------------------------------------------------------------------------------------------------|----------|
| 571 | Otoom, S., et al. (2004). "Comparative bioavailability of two cefadroxil products using serum and urine data in healthy human volunteers." Clin Exp Pharmacol Physiol 31(7): 433-437.                                                                                        | Title    |
| 572 | Oulianova, N., et al. (2007). "Human oral drugs absorption is correlated to their in vitro uptake by brush border membrane vesicles." Int J Pharm 336(1): 115-121.                                                                                                           | Title    |
| 573 | Ovalle, A., et al. (2000). "Prospective, randomized, comparative study of the efficacy, safety and cost of cefuroxime versus cephradine in acute pyelonephritis during pregnancy." Revista medica de Chile 128(7): 749-757.                                                  | Title    |
| 574 | Owens, D. R., et al. (1975). The Cephalosporin Group of Antibiotics. Advances in Pharmacology. S. Garattini, A. Goldin, F. Hawking, I. J. Kopin and R. J. Schnitzer, Academic Press. 13: 83-172.                                                                             | Title    |
| 575 | Padoin, C., et al. (1998). "Analysis of the pharmacokinetic interaction between cephalexin and quinapril by a nonlinear mixed-effect model." Antimicrob Agents Chemother 42(6): 1463-1469.                                                                                   | Abstract |
| 576 | Paixão, P., et al. (2012). "Prediction of the human oral bioavailability by using in vitro and in silico drug related parameters in a physiologically based absorption model." Int J Pharm 429(1): 84-98.                                                                    | Title    |
| 577 | Pallin, D. J., et al. (2013). "Clinical trial: comparative effectiveness of cephalexin plus trimethoprim-sulfamethoxazole versus cephalexin alone for treatment of uncomplicated cellulitis: a randomized controlled trial." Clinical infectious diseases 56(12): 1754-1762. | Title    |
| 578 | Pan, X., et al. (2003). "Altered diurnal rhythm of intestinal peptide transporter by fasting and its effects on the pharmacokinetics of ceftibuten." Journal of Pharmacology Experimental Therapeutics 307(2): 626-632.                                                      | Title    |
| 579 | Pankey, G. A. (1989). "Review of tissue penetration and clinical efficacy of enoxacin in skin and skin structure infections and in osteomyelitis." Clin Pharmacokinet 16 Suppl 1: 46-51.                                                                                     | Title    |
| 580 | Papantoniou, N., et al. (2007). "Pharmacokinetics of oral cefatrizine in pregnant and non-pregnant women with reference to fetal distribution." Fetal Diagn Ther 22(2): 100-106.                                                                                             | Title    |
| 581 | Papich, M. G. (2014). "Pharmacokinetic–pharmacodynamic (PK–PD) modeling and the rational selection of dosage regimes for the prudent use of antimicrobial drugs." Veterinary Microbiology 171(3): 480-486.                                                                   | Title    |
| 582 | Parish, L. C., et al. (1987). "Cefuroxime axetil in the treatment of cutaneous infections." International journal of dermatology 26(6): 389-393.                                                                                                                             | Title    |
| 583 | Parish, L. C., et al. (2000). "Moxifloxacin versus cephalexin in the treatment of uncomplicated skin infections." Int J Clin Pract 54(8): 497-503.                                                                                                                           | Abstract |

|     |                                                                                                                                                                                                                                                                          |        |
|-----|--------------------------------------------------------------------------------------------------------------------------------------------------------------------------------------------------------------------------------------------------------------------------|--------|
| 584 | Parish, L. C. and J. A. Witkowski (1991). "Cephalosporin therapy in dermatologic practice." Clinics in Dermatology 9(4): 459-469.                                                                                                                                        | Title  |
| 585 | Parsons, R. L., et al. (1975). "The absorption of antibiotics in adult patients with coeliac disease." J Antimicrob Chemother 1(1): 39-50.                                                                                                                               | Title  |
| 586 | Parsons, R. L. and G. M. Paddock (1975). "Absorption of two antibacterial drugs, cephalixin and co-trimoxazole, in malabsorption syndromes." J Antimicrob Chemother 1(3 Suppl): 59-67.                                                                                   | Title  |
| 587 | Patel, H., et al. (2017). "Review of pharmacokinetic data of different drug classes in Goto-Kakizaki rats, a non-obese model for Type 2 diabetes mellitus: case studies and perspectives." European journal of drug metabolism pharmacokinetics 42: 173-182.             | Animal |
| 588 | Paton, T. W., et al. (1985). "Drug therapy in patients undergoing peritoneal dialysis. Clinical pharmacokinetic considerations." Clin Pharmacokinet 10(5): 404-425.                                                                                                      | Title  |
| 589 | Paupe, J., et al. (1992). "Clinical trials on pediatric lower-respiratory-tract infection: results and comments with cefetamet pivoxil." Chemotherapy 38 Suppl 2: 29-32.                                                                                                 | Title  |
| 590 | Pedersen, S. S. (1989). "Clinical efficacy of ciprofloxacin in lower respiratory tract infections." Scand J Infect Dis Suppl 60: 89-97.                                                                                                                                  | Title  |
| 591 | Pennick, M. (2010). "Absorption of lisdexamfetamine dimesylate and its enzymatic conversion to d-amphetamine." Neuropsychiatr Dis Treat 6: 317-327.                                                                                                                      | Title  |
| 592 | Perbellini, A., et al. (1975). "[Clinical experiences with the use of a new antibiotic in inflammatory diseases of surgical interest]." Minerva Chir 30(9): 520-531.                                                                                                     | Title  |
| 593 | Pérez-Bendito, D., et al. (1996). "Advances in drug analysis by kinetic methods." J Pharm Biomed Anal 14(8): 917-930.                                                                                                                                                    | Title  |
| 594 | Perry, C. M. and L. J. Scott (2004). "Cefdinir: a review of its use in the management of mild-to-moderate bacterial infections." Drugs 64(13): 1433-1464.                                                                                                                | Title  |
| 595 | Peters, H. J. and G. Ludwig (1973). "[Antibiotic therapy of urinary tract infections]." Med Klin 68(26): 888-894.                                                                                                                                                        | Title  |
| 596 | Pfeffer, M., et al. (1983). "Human intravenous pharmacokinetics and absolute oral bioavailability of cefatrizine." Antimicrob Agents Chemother 24(6): 915-920.                                                                                                           | Title  |
| 597 | Pfeffer, M., et al. (1977). "Comparative human oral clinical pharmacology of cefadroxil, cephalixin, and cephradine." Antimicrob Agents Chemother 11(2): 331-338.                                                                                                        | Title  |
| 598 | Pfeifer, H. J., et al. (1979). "Effects of three antibiotics on theophylline kinetics." Clin Pharmacol Ther 26(1): 36-40.                                                                                                                                                | Title  |
| 599 | Nine healthy subjects received single doses of intravenous aminophylline (5 mg/kg) on four occasions separated by at least 1 wk. One trial was a control; the other three were performed during administration of therapeutic doses (250 mg every 6 hr) of tetracycline, | Title  |

|     |                                                                                                                                                                                                                                                                                                                                                                                                                                                                                                                                                                                                                                                                                                                    |        |
|-----|--------------------------------------------------------------------------------------------------------------------------------------------------------------------------------------------------------------------------------------------------------------------------------------------------------------------------------------------------------------------------------------------------------------------------------------------------------------------------------------------------------------------------------------------------------------------------------------------------------------------------------------------------------------------------------------------------------------------|--------|
|     | erythromycin, and cephalixin. Theophylline concentrations in multiple plasma samples drawn during 24 hr after each dose were determined by high-pressure liquid chromatography. Mean kinetic variables for theophylline during control, tetracycline, erythromycin, and cephalixin trials, respectively, were: volume of distribution, 0.57, 0.61, 0.63, and 0.62 l/kg; elimination half-life (t <sub>1/2</sub> ), 7.9, 9.2, 10.3, and 8.6 hr; total clearance, 0.90, 0.84, 0.78, and 0.89 ml/min/kg. In no case did differences between treatment conditions approach significance. Thus there is no consistent evidence of a kinetic interaction between theophylline and three commonly prescribed antibiotics. |        |
| 600 | Phan, D. D., et al. (2003). "Intra- and interindividual variabilities of valacyclovir oral bioavailability and effect of coadministration of an hPEPT1 inhibitor." <i>Antimicrob Agents Chemother</i> 47(7): 2351-2353.                                                                                                                                                                                                                                                                                                                                                                                                                                                                                            | Title  |
| 601 | Philipson, A., et al. (1987). "Comparison of the pharmacokinetics of cephradine and cefazolin in pregnant and non-pregnant women." <i>Clin Pharmacokinet</i> 12(2): 136-144.                                                                                                                                                                                                                                                                                                                                                                                                                                                                                                                                       | Title  |
| 602 | Piotrovskij, V. K., et al. (1994). "Modeling of the saturable time-constrained amoxicillin absorption in humans." 11: 1346-1351.                                                                                                                                                                                                                                                                                                                                                                                                                                                                                                                                                                                   | Title  |
| 603 | Plöger, G. F., et al. (2020). "Biowaiver Monographs for Immediate Release Solid Oral Dosage Forms: Cephalixin Monohydrate." <i>J Pharm Sci</i> 109(6): 1846-1862.                                                                                                                                                                                                                                                                                                                                                                                                                                                                                                                                                  | Title  |
| 604 | Polubiec, A., et al. (1988). "Bacterial infections of the lower urinary tract treated with ciprofloxacin or cefalexin--a comparative study." <i>Infection</i> 16 Suppl 1: S62-64.                                                                                                                                                                                                                                                                                                                                                                                                                                                                                                                                  | Title  |
| 605 | Popowicz, N. D., et al. (2018). "A rapid, LC-MS/MS assay for quantification of piperacillin and tazobactam in human plasma and pleural fluid; application to a clinical pharmacokinetic study." <i>Journal of Chromatography B</i> 1081-1082: 58-66.                                                                                                                                                                                                                                                                                                                                                                                                                                                               | Title  |
| 606 | Posada Henao, M. M. (2012). Importance of PEPT1 in the Absorption, Tissue Distribution and Disposition of Cefadroxil.                                                                                                                                                                                                                                                                                                                                                                                                                                                                                                                                                                                              | Title  |
| 607 | Posada, M. M. and D. E. Smith (2013). "In vivo absorption and disposition of cefadroxil after escalating oral doses in wild-type and PepT1 knockout mice." <i>Pharm Res</i> 30: 2931-2939.                                                                                                                                                                                                                                                                                                                                                                                                                                                                                                                         | Animal |
| 608 | Posada, M. M. and D. E. Smith (2013). "Relevance of PepT1 in the intestinal permeability and oral absorption of cefadroxil." <i>Pharm Res</i> 30: 1017-1025.                                                                                                                                                                                                                                                                                                                                                                                                                                                                                                                                                       | Title  |
| 609 | Pradhan, S. (2020). Dose adjustment based on renal function, University of Otago.                                                                                                                                                                                                                                                                                                                                                                                                                                                                                                                                                                                                                                  | Title  |
| 610 | Prandota, J. (1988). "Clinical pharmacology of antibiotics and other drugs in cystic fibrosis." <i>Drugs</i> 35(5): 542-578.                                                                                                                                                                                                                                                                                                                                                                                                                                                                                                                                                                                       | Title  |
| 611 | Putnam, W. S., et al. (2002). "Comparison of bidirectional cephalixin transport across MDCK and caco-2 cell monolayers: interactions with peptide transporters." <i>Pharm Res</i> 19(1): 27-33.                                                                                                                                                                                                                                                                                                                                                                                                                                                                                                                    | Title  |

|     |                                                                                                                                                                                                                                     |        |
|-----|-------------------------------------------------------------------------------------------------------------------------------------------------------------------------------------------------------------------------------------|--------|
| 612 | Putnam, W. S., et al. (2002). "Functional characterization of monocarboxylic acid, large neutral amino acid, bile acid and peptide transporters, and P-glycoprotein in MDCK and Caco-2 cells." J Pharm Sci 91(12): 2622-2635.       | Title  |
| 613 | Qian, S., et al. (2014). "Development, characterization and application of in situ gel systems for intranasal delivery of tacrine." Int J Pharm 468(1): 272-282.                                                                    | Title  |
| 614 | Quenzer, R. U. and D. R. P. Guay (1995). "Antimicrobial management strategies for patients with community-acquired respiratory tract infections." Current Therapeutic Research 56(5): 466-477.                                      | Title  |
| 615 | Quevedo, A., et al. (1993). "Cefetamet pivoxil in otitis media." ORL; journal for oto-rhino-laryngology and its related specialties 55(2): 93-96.                                                                                   | Title  |
| 616 | Quigley, J. M., et al. (1994). "The synthesis, hydrolysis kinetics and lipophilicity of O-acyl esters of propranolol." Int J Pharm 101(1): 145-163.                                                                                 | Title  |
| 617 | Quintiliani, R. (1996). "Cefixime: a pharmacoeconomic perspective." Current Therapeutic Research 57(12): 892-912.                                                                                                                   | Title  |
| 618 | Racissi, S. D., et al. (1999). "The role of an alpha-amino group on H <sup>+</sup> -dependent transepithelial transport of cephalosporins in Caco-2 cells." J Pharm Pharmacol 51(1): 35-40.                                         | Title  |
| 619 | Rahal, J. J. and M. S. Simberkoff (1978). "Adverse reactions to anti-infective agents." Disease-a-Month 25(1): 1-67.                                                                                                                | Title  |
| 620 | Rahim, N., et al. (2016). "Comparative bioavailability and pharmacokinetic study of Cefadroxil capsules in male healthy volunteers of Pakistan." Pak J Pharm Sci 29(2): 453-459.                                                    | Title  |
| 621 | Rahim, S. A., et al. (2017). "Influence of calcium carbonate and sodium carbonate gassing agents on pentoxifylline floating tablets properties." Powder Technology 322: 65-74.                                                      | Title  |
| 622 | Rakic, A., et al. (2007). "High-performance liquid chromatographic method for the determination of moclobemide and its two major metabolites in human plasma." J Pharm Biomed Anal 43(4): 1416-1422.                                | Title  |
| 623 | Ranaldi, G., et al. (1994). "D-cycloserine uses an active transport mechanism in the human intestinal cell line Caco 2." Antimicrob Agents Chemother 38(6): 1239-1245.                                                              | Title  |
| 624 | Randolph, M. F. (1988). "Clinical comparison of once-daily cefadroxil and thrice-daily cefaclor in the treatment of streptococcal pharyngitis." Chemotherapy 34(6): 512-518.                                                        | Title  |
| 625 | Ranganath, S. H., et al. (2010). "The use of submicron/nanoscale PLGA implants to deliver paclitaxel with enhanced pharmacokinetics and therapeutic efficacy in intracranial glioblastoma in mice." Biomaterials 31(19): 5199-5207. | Animal |

|     |                                                                                                                                                                                                                                                     |          |
|-----|-----------------------------------------------------------------------------------------------------------------------------------------------------------------------------------------------------------------------------------------------------|----------|
| 626 | Rattie, E. S., et al. (1976). "Pharmacokinetic interpretation of cephradine levels in serum after intravenous and extravascular administration in humans." <i>Antimicrob Agents Chemother</i> 10(2): 283-287.                                       | Title    |
| 627 | Rauchegger, H., et al. (1989). "[Rational dosing intervals in streptococcal infections of the pharynx]." <i>Wien Klin Wochenschr</i> 101(7): 230-233.                                                                                               | Title    |
| 628 | Reboli, A. C. and V. E. Del Bene (1988). "Oral Antibiotic Therapy of Dermatologic Conditions." <i>Dermatologic Clinics</i> 6(4): 497-520.                                                                                                           | Title    |
| 629 | Redrobe, S. (2000). "Treatment of avian liver disease." <i>Seminars in Avian and Exotic Pet Medicine</i> 9(3): 136-145.                                                                                                                             | Title    |
| 630 | Reed, B. D., et al. (1991). "Treatment of beta-hemolytic streptococcal pharyngitis with cefaclor or penicillin. Efficacy and interaction with beta-lactamase-producing organisms in the pharynx." <i>Journal of family practice</i> 32(2): 138-144. | Title    |
| 631 | Reed, M. D. and J. L. Blumer (1988). "Urologic Pharmacology in the Office Setting." <i>Urologic Clinics of North America</i> 15(4): 737-751.                                                                                                        | Title    |
| 632 | Regamey, C. and L. Humair (1971). "Pharmacokinetics of cephalexin in renal insufficiency." <i>Postgrad Med J</i> 47: Suppl:69-78.                                                                                                                   | Abstract |
| 633 | Rehm, S. J. and M. C. McHenry (1983). "Oral Antimicrobial Drugs." <i>Medical Clinics of North America</i> 67(1): 57-98.                                                                                                                             | Title    |
| 634 | Reigner, B. G., et al. (1990). "Saturable rate of cefatrizine absorption after oral administration to humans." <i>J Pharmacokinet Biopharm</i> 18(1): 17-34.                                                                                        | Title    |
| 635 | Retsema, J. (1999). "Susceptibility and resistance emergence studies with macrolides." <i>Int J Antimicrob Agents</i> 11: S15-S21.                                                                                                                  | Title    |
| 636 | Reyes, L., et al. (2002). "Observer-blinded comparison of two nonopioid analgesics for postoperative pain in piglets." <i>Pharmacology Biochemistry and Behavior</i> 73(3): 521-528.                                                                | Title    |
| 637 | Roberts, D. H., et al. (1981). "Pharmacokinetics of cephradine given intravenously with and without probenecid." <i>Br J Clin Pharmacol</i> 11(6): 561-564.                                                                                         | Title    |
| 638 | Roberts, J. and N. Tumer (1988). "Age and diet effects on drug action." <i>Pharmacology &amp; Therapeutics</i> 37(1): 111-149.                                                                                                                      | Title    |
| 639 | Rodriguez, W. J., et al. (1979). "Cefaclor in the treatment of susceptible infections in infants and children." <i>Postgrad Med J</i> 55 Suppl 4: 35-38.                                                                                            | Title    |
| 640 | Rooney, R., et al. (1988). "Serum concentrations of cephalosporins and the cell saver in cardiopulmonary bypass surgery." <i>J Antimicrob Chemother</i> 22(2): 266-268.                                                                             | Title    |
| 641 | Roseboom, P. H., et al. (2021). "Evidence in primates supporting the use of chemogenetics for the treatment of human refractory neuropsychiatric disorders." <i>Molecular Therapy</i> 29(12): 3484-3497.                                            | Title    |

|     |                                                                                                                                                                                                                                                |          |
|-----|------------------------------------------------------------------------------------------------------------------------------------------------------------------------------------------------------------------------------------------------|----------|
| 642 | Rotschafer, J. C., et al. (1982). "Cefaclor pharmacokinetic parameters: serum concentrations determined by a new high-performance liquid chromatographic technique." <i>Antimicrob Agents Chemother</i> 21(1): 170-172.                        | Title    |
| 643 | Rouan, M., et al. (1984). "Pharmacokinetics and dosage adjustment of cefotiam in renal impaired patients." <i>Journal of antimicrobial chemotherapy</i> 13(6): 611-618.                                                                        | Title    |
| 644 | Rouan, M. C., et al. (1983). "Systematic approach to the determination of cephalosporins in biological fluids by reversed-phase liquid chromatography." <i>Journal of Chromatography B: Biomedical Sciences and Applications</i> 275: 133-144. | Title    |
| 645 | Rouan, M.-C., et al. (1985). "Pharmacokinetics of cefotiam in humans." <i>Antimicrobial Agents Chemotherapy</i> 27(2): 177-180.                                                                                                                | Title    |
| 646 | Roujeau, J.-C., et al. (1990). "Toxic epidermal necrolysis (Lyell syndrome)." <i>Journal of the American Academy of Dermatology</i> 23(6, Part 1): 1039-1058.                                                                                  | Title    |
| 647 | Rylander, M., et al. (1979). "Penetration of cephradine and cefazolin into ulcers of patients suffering from peripheral arterial circulatory insufficiency." <i>Scand J Infect Dis</i> 11(4): 281-286.                                         | Title    |
| 648 | Sabella, C. and J. Goldfarb (1999). "Principles of selection and use of antimicrobial agents." <i>Seminars in Pediatric Infectious Diseases</i> 10(1): 3-13.                                                                                   | Title    |
| 649 | Sader, H. S., et al. (2007). "Review of the spectrum and potency of orally administered cephalosporins and amoxicillin/clavulanate." <i>Diagn Microbiol Infect Dis</i> 57(3 Suppl): 5s-12s.                                                    | Title    |
| 650 | Sadick, N. S. (2001). "SYSTEMIC ANTIBIOTIC AGENTS." <i>Dermatologic Clinics</i> 19(1): 1-21.                                                                                                                                                   | Title    |
| 651 | Sain, B., et al. (2018). "Dalafloxacin-Antibacterial: a review." <i>Int. J. Res</i> 6: 91-101.                                                                                                                                                 | Title    |
| 652 | Saito, A., et al. (2021). "Impact of Direction of Transport on the Evaluation of Inhibition Potencies of Multidrug and Toxin Extrusion Protein 1 Inhibitors." <i>Drug Metab Dispos</i> 49(2): 152-158.                                         | Title    |
| 653 | Saito, A., et al. (1977). "[Long-acting cefalexin preparation (S-6436): pharmacokinetics and clinical evaluation (author's transl)]." <i>Kansenshogaku Zasshi</i> 51(6): 303-311.                                                              | Abstract |
| 654 | Saito, H. and K. Inui (1993). "Dipeptide transporters in apical and basolateral membranes of the human intestinal cell line Caco-2." <i>Am J Physiol</i> 265(2 Pt 1): G289-294.                                                                | Title    |
| 655 | Saito, Y., et al. (2019). "Effects of thylakoid-rich spinach extract on the pharmacokinetics of drugs in rats." <i>Biological Pharmaceutical Bulletin</i> 42(1): 103-109.                                                                      | Animal   |



|     |                                                                                                                                                                                                                                                              |        |
|-----|--------------------------------------------------------------------------------------------------------------------------------------------------------------------------------------------------------------------------------------------------------------|--------|
| 656 | Saitoh, H., et al. (2002). "In vitro permeation of beta-lactam antibiotics across rat jejunum and its correlation with oral bioavailability in humans." Br J Clin Pharmacol 54(4): 445-448.                                                                  | Title  |
| 657 | Sakai, K., et al. (1985). "Clinical evaluation of S6472 (prolonged action preparation of cefaclor) in the treatment of skin and soft tissue infections. A double blind comparison of S6472 and cefaclor." Japanese journal of antibiotics 38(10): 2716-2734. | Title  |
| 658 | Sakamoto, H., et al. (1985). "Pharmacokinetics of FK027 in rats and dogs." J Antibiot (Tokyo) 38(4): 496-504.                                                                                                                                                | Animal |
| 659 | Sakamoto, H., et al. (1988). "Pharmacokinetics of FK482, a new orally active cephalosporin, in animals." J Antibiot (Tokyo) 41(12): 1896-1905.                                                                                                               | Animal |
| 660 | Sakamoto, T., et al. (1985). "[Prolonged action preparation of cefaclor]." Jpn J Antibiot 38(3): 813-821.                                                                                                                                                    | Title  |
| 661 | Sakane, T., et al. (1999). "Transnasal delivery of 5-fluorouracil to the brain in the rat." J Drug Target 7(3): 233-240.                                                                                                                                     | Animal |
| 662 | Sala-Rabanal, M., et al. (2008). "Molecular mechanism of dipeptide and drug transport by the human renal H <sup>+</sup> /oligopeptide cotransporter hPEPT2." Am J Physiol Renal Physiol 294(6): F1422-1432.                                                  | Title  |
| 663 | Sammata, S. M., et al. (2009). "Dermal Drug Levels of Antibiotic (Cephalexin) Determined by Electroporation and Transcutaneous Sampling (ETS) Technique." J Pharm Sci 98(8): 2677-2685.                                                                      | Title  |
| 664 | Sánchez-Picó, A., et al. (1989). "Non-linear intestinal absorption kinetics of cefadroxil in the rat." J Pharm Pharmacol 41(3): 179-185.                                                                                                                     | Animal |
| 665 | Sandberg, T., et al. (1990). "Randomised double-blind study of norfloxacin and cefadroxil in the treatment of acute pyelonephritis." European journal of clinical microbiology & infectious diseases 9(5): 317-323.                                          | Title  |
| 666 | Sandberg, T., et al. (1985). "Cefadroxil once daily for three or seven days versus amoxycillin for seven days in uncomplicated urinary tract infections in women." Scand J Infect Dis 17(1): 83-87.                                                          | Title  |
| 667 | Santella, P. J. and D. Henness (1982). "A review of the bioavailability of cefadroxil." J Antimicrob Chemother 10 Suppl B: 17-25.                                                                                                                            | Title  |
| 668 | Santella, P. J., et al. (1978). "An overview of results of world-wide clinical trials with cefadroxil." J Int Med Res 6(6): 441-451.                                                                                                                         | Title  |
| 669 | Sasaki, I., et al. (1990). "Clinical evaluation of cefuroxime axetil in acute dental infections. Double blind comparative study vs. cefaclor." Japanese journal of antibiotics 43(12): 2035-2068.                                                            | Title  |
| 670 | Sasaki, J., et al. (1979). "[Absorption, excretion and pharmacokinetics of cefadroxil in human (author's transl)]." Jpn J Antibiot 32(12): 1372-1377.                                                                                                        | Title  |
| 671 | Satterwhite, J. H., et al. (1992). "Pharmacokinetics of cefaclor AF: effects of age, antacids and H <sub>2</sub> -receptor antagonists." Postgrad Med J 68 Suppl 3: S3-9.                                                                                    | Title  |

|     |                                                                                                                                                                                                                                                             |          |
|-----|-------------------------------------------------------------------------------------------------------------------------------------------------------------------------------------------------------------------------------------------------------------|----------|
| 672 | Scaglione, F., et al. (2003). "Measurement of cefaclor and amoxicillin-clavulanic acid levels in middle-ear fluid in patients with acute otitis media." <i>Antimicrob Agents Chemother</i> 47(9): 2987-2989.                                                | Title    |
| 673 | Schelleman, H., et al. (2008). "Warfarin with fluoroquinolones, sulfonamides, or azole antifungals: interactions and the risk of hospitalization for gastrointestinal bleeding." <i>Clin Pharmacol Ther</i> 84(5): 581-588.                                 | Title    |
| 674 | Schneider, H., et al. (1978). "Evaluation of an oral prolonged-release antibiotic formulation." <i>J Pharm Sci</i> 67(11): 1620-1622.                                                                                                                       | Title    |
| 675 | Schneider, P., et al. (1982). "Antibacterial effects of cefroxadine, cephalexin and cephradine in a new in vitro pharmacokinetic model." <i>J Antibiot (Tokyo)</i> 35(7): 843-849.                                                                          | Abstract |
| 676 | Schulze, J. D. R., et al. (2005). "Excipient effects on gastrointestinal transit and drug absorption in beagle dogs." <i>Int J Pharm</i> 300(1): 67-75.                                                                                                     | Animal   |
| 677 | Schwinghammer, T. L., et al. (1990). "Pharmacokinetics of cephradine administered intravenously and orally to young and elderly subjects." <i>J Clin Pharmacol</i> 30(10): 893-899.                                                                         | Title    |
| 678 | Segreti, J. and G. M. Trenholme (1986). "Antibiotics I: Beta-Lactam Antibiotics, the Tetracyclines, Chloramphenicol, Erythromycin, Clindamycin, Metronidazole, and the Quinolones." <i>Clinics in Chest Medicine</i> 7(3): 393-412.                         | Title    |
| 679 | Selva Olid, A., et al. (2015). "Systemic antibiotics for treating diabetic foot infections." <i>Cochrane Database of Systematic Reviews</i> (9).                                                                                                            | Title    |
| 680 | Serra, C. H. S., et al. (2015). "Dissolution efficiency and bioequivalence study using urine data from healthy volunteers: a comparison between two tablet formulations of cephalexin." <i>Brazilian journal of pharmaceutical sciences</i> 51(2): 383-392. | Abstract |
| 681 | Seta, Y., et al. (1988). "Design and preparation of captopril sustained-release dosage forms and their biopharmaceutical properties." <i>Int J Pharm</i> 41(3): 245-254.                                                                                    | Title    |
| 682 | Shanker, S. A., et al. (1983). "Effect of food on cefaclor bioavailability in children." <i>Med J Aust</i> 2(8): 372.                                                                                                                                       | Title    |
| 683 | Sharma, S. (2020). "Galantamine delivery for Alzheimer's disease." <i>Sustainable Agriculture Reviews</i> 43: <i>Pharmaceutical Technology for Natural Products Delivery Vol. 1 Fundamentals Applications</i> : 131-159.                                    | Title    |
| 684 | Sheen-Chen, S. M., et al. (1995). "Postoperative T-tube cholangiography: is routine antibiotic prophylaxis necessary? A prospective, controlled study." <i>Archives of surgery (Chicago, Ill. : 1960)</i> 130(1): 20-23.                                    | Title    |
| 685 | Shen, H. (2006). PEPT2 immunolocalization and its role in cefadroxil renal tubular reabsorption and brain penetration, University of Michigan.                                                                                                              | Title    |

|     |                                                                                                                                                                                                                    |          |
|-----|--------------------------------------------------------------------------------------------------------------------------------------------------------------------------------------------------------------------|----------|
| 686 | Shen, H., et al. (2007). "Impact of genetic knockout of PEPT2 on cefadroxil pharmacokinetics, renal tubular reabsorption, and brain penetration in mice." <i>Drug metabolism disposition</i> 35(7): 1209-1216.     | Animal   |
| 687 | Shibaki, H., et al. (1986). "A double blind comparative study on the efficacy of S6472, cefaclor and amoxicillin, in the treatment of bacterial pneumonia." <i>Japanese journal of antibiotics</i> 39(3): 853-886. | Title    |
| 688 | Shimizu, R., et al. (2008). "Quantitative prediction of oral absorption of PEPT1 substrates based on in vitro uptake into Caco-2 cells." <i>Int J Pharm</i> 354(1-2): 104-110.                                     | Title    |
| 689 | Shimizu, T., et al. (2011). "PDZK1 regulates breast cancer resistance protein in small intestine." 39(11): 2148-2154.                                                                                              | Title    |
| 690 | Shingaki, T., et al. (2011). "Nasal delivery of P-gp substrates to the brain through the nose–brain pathway." <i>Drug metabolism pharmacokinetics</i> 26(3): 248-255.                                              | Title    |
| 691 | Shingaki, T., et al. (2010). "Transnasal delivery of methotrexate to brain tumors in rats: a new strategy for brain tumor chemotherapy." <i>Molecular Pharmaceutics</i> 7(5): 1561-1568.                           | Animal   |
| 692 | Shipkova, M. and D. Svinarov (2016). "LC–MS/MS as a tool for TDM services: Where are we?" <i>Clinical Biochemistry</i> 49(13): 1009-1023.                                                                          | Title    |
| 693 | Shoaib, M. H., et al. (2008). "Pharmacokinetic study of cephadrine in Pakistani healthy male volunteers." <i>Pak J Pharm Sci</i> 21(4): 400-406.                                                                   | Title    |
| 694 | Shyu, W. C., et al. (1991). "Simultaneous high-performance liquid chromatographic analysis of cefprozil diastereomers in a pharmacokinetic study." <i>Pharm Res</i> 8(8): 992-996.                                 | Title    |
| 695 | Sides, G. D., et al. (1988). "A comprehensive review of the clinical pharmacology and pharmacokinetics of cefaclor." <i>Clin Ther</i> 11 Suppl A: 5-19.                                                            | Title    |
| 696 | Simon, C. (1980). "[Pharmacokinetics of cefadroxil, a new oral cephalosporin (author's transl)]." <i>Arzneimittelforschung</i> 30(3): 502-504.                                                                     | Title    |
| 697 | Simon, C. and U. Gatzemeier (1979). "Serum and sputum levels of cefaclor." <i>Postgrad Med J</i> 55 Suppl 4: 30-34.                                                                                                | Title    |
| 698 | Simon, C., et al. (1970). "[Pharmacokinetics of cephalixin in adults and children]." <i>Dtsch Med Wochenschr</i> 95(42): 2103-2108.                                                                                | Abstract |
| 699 | Simone, C., et al. (1994). "Drug Transfer Across the Placenta: Considerations in Treatment and Research." <i>Clinics in Perinatology</i> 21(3): 463-481.                                                           | Title    |
| 700 | Singhvi, S. M., et al. (1978). "Pharmacokinetics of cephalosporin antibiotics: protein-binding considerations." <i>Chemotherapy</i> 24(3): 121-133.                                                                | Title    |

|     |                                                                                                                                                                                                                                                                                          |        |
|-----|------------------------------------------------------------------------------------------------------------------------------------------------------------------------------------------------------------------------------------------------------------------------------------------|--------|
| 701 | Sinko, P. J., et al. (1993). "Mass balance approaches for estimating the intestinal absorption and metabolism of peptides and analogues: theoretical development and applications." <i>Pharm Res</i> 10(2): 271-275.                                                                     | Title  |
| 702 | Sjögren, E., et al. (2013). "In silico predictions of gastrointestinal drug absorption in pharmaceutical product development: application of the mechanistic absorption model GI-Sim." <i>European Journal of Pharmaceutical Sciences</i> 49(4): 679-698.                                | Title  |
| 703 | Smith, L. G. and J. Sensakovic (1982). "Trimethoprim-Sulfamethoxazole." <i>Medical Clinics of North America</i> 66(1): 143-156.                                                                                                                                                          | Title  |
| 704 | Smith, P., et al. (1994). SK&F 110679: comparison of absorption following oral or respiratory administration. <i>Advances in Drug Delivery Systems</i> , 6, Elsevier: 67-77.                                                                                                             | Title  |
| 705 | Smith, P. L., et al. (1994). "SK&F 110679: comparison of absorption following oral or respiratory administration." <i>Journal of Controlled Release</i> 28(1): 67-77.                                                                                                                    | Title  |
| 706 | Snyder, N. J., et al. (1997). "Structure-activity relationship of carbacephalosporins and cephalosporins: antibacterial activity and interaction with the intestinal proton-dependent dipeptide transport carrier of Caco-2 cells." <i>Antimicrob Agents Chemother</i> 41(8): 1649-1657. | Title  |
| 707 | Soback, S., et al. (1987). "Clinical pharmacokinetics of five oral cephalosporins in calves." <i>Research in Veterinary Science</i> 43(2): 166-172.                                                                                                                                      | Animal |
| 708 | Sondheimer, J. H. and S. D. Migdal (1987). "Toxic Nephropathies." <i>Critical Care Clinics</i> 3(4): 883-907.                                                                                                                                                                            | Title  |
| 709 | Song, F., et al. (2017). "Species Differences in Human and Rodent PEPT2-Mediated Transport of Glycylsarcosine and Cefadroxil in <i>Pichia Pastoris</i> Transformants." <i>Drug Metab Dispos</i> 45(2): 130-136.                                                                          | Title  |
| 710 | Soranzo, M. L., et al. (1981). "[Clinical study on a new cephalosporin: CGP 9000 (cefroxadine)]." <i>Minerva Med</i> 72(13): 813-818.                                                                                                                                                    | Title  |
| 711 | Sourgens, H., et al. (1997). "Pharmacokinetic profile of cefaclor." <i>Int J Clin Pharmacol Ther</i> 35(9): 374-380.                                                                                                                                                                     | Title  |
| 712 | Sprefico, P., et al. (1987). "Cesarean section: antibiotic prophylaxis with ceftazidime." <i>Chemioterapia</i> 6(2 Suppl): 613-616.                                                                                                                                                      | Title  |
| 713 | Spyker, D. A., et al. (1982). "Pharmacokinetics of cefaclor in renal failure: effects of multiple doses and hemodialysis." <i>Antimicrob Agents Chemother</i> 21(2): 278-281.                                                                                                            | Title  |
| 714 | Stamey, T. A. (1987). "Recurrent urinary tract infections in female patients: an overview of management and treatment." <i>Rev Infect Dis</i> 9 Suppl 2: S195-210.                                                                                                                       | Title  |
| 715 | Statelova, M., et al. (2020). "On the design of food effect studies in adults for extrapolating oral drug absorption data to infants: an exploratory study highlighting the importance of infant food." <i>The AAPS Journal</i> 22: 1-11.                                                | Title  |

|     |                                                                                                                                                                                                                                          |          |
|-----|------------------------------------------------------------------------------------------------------------------------------------------------------------------------------------------------------------------------------------------|----------|
| 716 | Steffansen, B., et al. (1999). "Stability, metabolism and transport of D-Asp(OBzl)-Ala--a model prodrug with affinity for the oligopeptide transporter." <i>Eur J Pharm Sci</i> 8(1): 67-73.                                             | Title    |
| 717 | Stein, G. E., et al. (1997). "Pharmacodynamic activity of five oral cephalosporins against <i>Haemophilus influenzae</i> ." <i>Pharmacotherapy</i> 17(2): 235-241.                                                                       | Title    |
| 718 | Stevens, D. L., et al. (1993). "Comparison of oral cefpodoxime proxetil and cefaclor in the treatment of skin and soft tissue infections." <i>Diagn Microbiol Infect Dis</i> 16(2): 123-129.                                             | Title    |
| 719 | Stevens, R. C. and J. H. Rodman (1998). "Pharmacokinetics of antimicrobial therapy." <i>Seminars in Pediatric Infectious Diseases</i> 9(4): 273-280.                                                                                     | Title    |
| 720 | Stiefeld, S. M., et al. (1991). "Toxicities of Antimicrobial Agents Used to Treat Osteomyelitis." <i>Orthopedic Clinics of North America</i> 22(3): 439-465.                                                                             | Title    |
| 721 | Stillerman, M., et al. (1984). "Comparison between cephalexin two- and four-time per day regimens in group A streptococcal pharyngitis." <i>Clinical pediatrics</i> 23(6): 348-351.                                                      | Title    |
| 722 | Stillhart, C., et al. (2020). "Impact of gastrointestinal physiology on drug absorption in special populations—An UNGAP review." <i>European Journal of Pharmaceutical Sciences</i> 147: 105280.                                         | Title    |
| 723 | Stone, J. W., et al. (1989). "Cefixime, in-vitro activity, pharmacokinetics and tissue penetration." <i>J Antimicrob Chemother</i> 23(2): 221-228.                                                                                       | Title    |
| 724 | Strömberg, A., et al. (1987). "Concentrations of phenoxymethylpenicillin and cefadroxil in tonsillar tissue and tonsillar surface fluid." <i>Eur J Clin Microbiol</i> 6(5): 525-529.                                                     | Title    |
| 725 | Strömberg, A., et al. (1988). "Five versus ten days treatment of group A streptococcal pharyngotonsillitis: a randomized controlled clinical trial with phenoxymethylpenicillin and cefadroxil." <i>Scand J Infect Dis</i> 20(1): 37-46. | Title    |
| 726 | Subba Rao, S. D., et al. (1998). "A randomized, observer-blind trial of amoxycillin/clavulanate versus cefaclor in the treatment of children with acute otitis media. Augmentin 415 Study Group." <i>J Chemother</i> 10(6): 460-468.     | Title    |
| 727 | Sugawara, M., et al. (1991). "Transport characteristics of ceftibuten, cefixime and cephalexin across human jejunal brush-border membrane." <i>J Pharm Pharmacol</i> 43(12): 882-884.                                                    | Abstract |
| 728 | Sugawara, M., et al. (1992). "Transport characteristics of cephalosporin antibiotics across intestinal brush-border membrane in man, rat and rabbit." <i>J Pharm Pharmacol</i> 44(12): 968-972.                                          | Animal   |

|     |                                                                                                                                                                                                             |          |
|-----|-------------------------------------------------------------------------------------------------------------------------------------------------------------------------------------------------------------|----------|
| 729 | Sugiura, T., et al. (2008). "PDZK1 regulates two intestinal solute carriers (Slc15a1 and Slc22a5) in mice." Drug Metab Dispos 36(6): 1181-1188.                                                             | Animal   |
| 730 | Sugiura, T., et al. (2010). "PDZK1 Regulates Organic Anion Transporting Polypeptide Oatpla in Mouse Small Intestine." Drug Metabolism Pharmacokinetics 25(6): 588-598.                                      | Animal   |
| 731 | Sugiura, T., et al. (2013). "Pharmacokinetic Modeling of Hepatocyte Growth Factor in Experimental Animals and Humans." J Pharm Sci 102(1): 237-249.                                                         | Title    |
| 732 | Suleiman, M. S., et al. (1988). "A bioequivalence study of six brands of cephalexin." J Clin Pharm Ther 13(1): 65-72.                                                                                       | Abstract |
| 733 | Sun, B. W., et al. (2003). "Hormonal regulation of dipeptide transporter (PepT1) in Caco-2 cells with normal and anoxia/reoxygenation management." World J Gastroenterol 9(4): 808-812.                     | Title    |
| 734 | Sun, L. N., et al. (2022). "LC-MS/MS methods for determination of unstable pivmecillinam and mecillinam in acidified human plasma: Application to a pharmacokinetic study." J Sep Sci 45(14): 2543-2554.    | Title    |
| 735 | Sun, Y., et al. (2018). "PEPT1-mediated prodrug strategy for oral delivery of peramivir." Asian journal of pharmaceutical sciences 13(6): 555-565.                                                          | Title    |
| 736 | Sunakawa, K. and K. Shiba (1994). "[Reevaluation of current antimicrobials. Cefaclor]." Jpn J Antibiot 47(7): 853-860.                                                                                      | Title    |
| 737 | Susanto, M. (2002). Investigating the role of P-glycoprotein on drugs exhibiting enhanced renal clearance in cystic fibrosis patients, University of California, San Francisco.                             | Title    |
| 738 | Syposs, T., et al. (1986). "[Serum level of antibiotics in burn patients]." Zentralbl Chir 111(24): 1519-1525.                                                                                              | Title    |
| 739 | Tagaya, E., et al. (2002). "Effect of a short course of clarithromycin therapy on sputum production in patients with chronic airway hypersecretion." Chest 122(1): 213-218.                                 | Title    |
| 740 | Tajana, A. (1991). "Stereoselective Pharmacokinetics." New Trends in Pharmacokinetics: 227-255.                                                                                                             | Title    |
| 741 | Takagi, T., et al. (2006). "A provisional biopharmaceutical classification of the top 200 oral drug products in the United States, Great Britain, Spain, and Japan." Molecular Pharmaceutics 3(6): 631-643. | Title    |
| 742 | Takahashi, T., et al. (2010). "Effects of Acanthopanax senticosus HARMS extract on drug transport in human intestinal cell line Caco-2." J Nat Med 64(1): 55-62.                                            | Title    |
| 743 | Takeda, M., et al. (2002). "Interaction of human organic anion transporters with various cephalosporin antibiotics." Eur J Pharmacol 438(3): 137-142.                                                       | Title    |

|     |                                                                                                                                                                                                                                                                                      |        |
|-----|--------------------------------------------------------------------------------------------------------------------------------------------------------------------------------------------------------------------------------------------------------------------------------------|--------|
| 744 | Takimoto, M., et al. (1981). "[Clinical results of cefadroxil in children and pharmacokinetics of the drug (author's transl)]." Jpn J Antibiot 34(2): 140-142.                                                                                                                       | Title  |
| 745 | Talluri, R. S. (2008). Stereoisomeric dipeptide prodrugs of acyclovir: A tool to improve cellular absorption, oral bioavailability and corneal permeation of Acyclovir in treatment of oral, genital and ocular herpes simplex viral infections, University of Missouri-Kansas City. | Title  |
| 746 | Tamai, I., et al. (1995). "Functional expression of transporter for beta-lactam antibiotics and dipeptides in <i>Xenopus laevis</i> oocytes injected with messenger RNA from human, rat and rabbit small intestines." J Pharmacol Exp Ther 273(1): 26-31.                            | Animal |
| 747 | Tamassia, V., et al. (1979). "[Correlation between antibacterial activity of some cephalosporins and pharmacokinetic properties "in vitro" (author's transl)]." Quad Sclavo Diagn 15 Suppl 1: 785-792.                                                                               | Title  |
| 748 | Tamura, K., et al. (1996). "Metabolism, uptake, and transepithelial transport of the stereoisomers of Val-Val-Val in the human intestinal cell line, Caco-2." Pharm Res 13(11): 1663-1667.                                                                                           | Title  |
| 749 | Tan, Z., et al. (2021). "Physiologically Based Pharmacokinetic Modeling of Cefadroxil in Mouse, Rat, and Human to Predict Concentration–Time Profile at Infected Tissue." Frontiers in pharmacology: 3630.                                                                           | Animal |
| 750 | Tanaka, Y., et al. (2021). "Intraluminal Behavior of Various Transporter Substrates in the Rat Gastrointestinal Tract." Journal of Pharmacy Pharmaceutical Sciences 24: 563-570.                                                                                                     | Animal |
| 751 | Tanimura, H., et al. (2003). "Study of the absorption of cefcapene pivoxil in patients with infectious disease and soft stool or diarrhea." Journal of Infection and Chemotherapy 9(1): 75-82.                                                                                       | Title  |
| 752 | Tanrisever, B. and P. J. Santella (1986). "Cefadroxil. A review of its antibacterial, pharmacokinetic and therapeutic properties in comparison with cephalexin and cephradine." Drugs 32 Suppl 3: 1-16.                                                                              | Title  |
| 753 | Tao, W., et al. (2018). "Intestinal absorption and activation of decitabine amino acid ester prodrugs mediated by peptide transporter PEPT1 and enterocyte enzymes." Int J Pharm 541(1-2): 64-71.                                                                                    | Title  |
| 754 | Tateno, M., et al. (1985). "[Absorption and excretion studies of S6472 (sustained release preparations of cefaclor)]." Jpn J Antibiot 38(3): 834-848.                                                                                                                                | Title  |
| 755 | Tauchnitz, C. (1976). "[The cephalosporins and their clinical value]." Z Gesamte Inn Med 31(20): 828-834.                                                                                                                                                                            | Title  |
| 756 | Terada, T., et al. (2006). "Molecular cloning, functional characterization and tissue distribution of rat H <sup>+</sup> /organic cation antiporter MATE1." Pharm Res 23(8): 1696-1701.                                                                                              | Animal |

|     |                                                                                                                                                                                                                                       |          |
|-----|---------------------------------------------------------------------------------------------------------------------------------------------------------------------------------------------------------------------------------------|----------|
| 757 | Tetzlaff, T. R., et al. (1978). "Bioavailability of cephalexin in children: relationship to drug formulations and meals." J Pediatr 92(2): 292-294.                                                                                   | Abstract |
| 758 | Thompson, B. (2020). Mechanisms and Modeling of the Intestinal Absorption, Activation, and Systemic Availability of Gemcitabine and a Gemcitabine Prodrug for Oral Administration.                                                    | Title    |
| 759 | Thornberry, C. (1992). "Review of the in vitro antibacterial activity of cefprozil, a new oral cephalosporin." Clin Infect Dis 14 Suppl 2: S189-194; discussion S195-186.                                                             | Title    |
| 760 | Thwaites, D. T., et al. (1994). "Substrate specificity of the di/tripeptide transporter in human intestinal epithelia (Caco-2): identification of substrates that undergo H(+)-coupled absorption." Br J Pharmacol 113(3): 1050-1056. | Title    |
| 761 | Tian, C., et al. (2017). "Improving intestinal absorption and oral bioavailability of curcumin via taurocholic acid-modified nanostructured lipid carriers." International journal of nanomedicine 12: 7897.                          | Title    |
| 762 | Todd, W. M. (1994). "Cefpodoxime proxetil: a comprehensive review." Int J Antimicrob Agents 4(1): 37-62.                                                                                                                              | Title    |
| 763 | Tomatsu, K., et al. (1987). "In vitro and in vivo evaluations of BMY-28100, a new oral cephalosporin." J Antibiot (Tokyo) 40(8): 1175-1183.                                                                                           | Title    |
| 764 | Tomić, Z., et al. (2016). "Do We Bury Antibacterials When Launching? Cefaclor Example." J Pharm Sci 105(3): 1295-1300.                                                                                                                | Title    |
| 765 | Touitou, E. and B. W. Barry (2006). Enhancement in drug delivery, CRC Press.                                                                                                                                                          | Title    |
| 766 | Toyonaga, Y., et al. (1992). "[Bacteriological, pharmacokinetic and clinical studies of 5% and 10% granules of cefdinir in the pediatric field]." Jpn J Antibiot 45(1): 48-73.                                                        | Title    |
| 767 | Toyonaga, Y., et al. (1989). "[Bacteriological, pharmacokinetic and clinical studies on cefteram pivoxil in the pediatric field]." Jpn J Antibiot 42(8): 1799-1814.                                                                   | Title    |
| 768 | Toyonaga, Y., et al. (1989). "[Bacteriological, pharmacokinetic and clinical studies on cefpodoxime proxetil in the pediatric field]." Jpn J Antibiot 42(7): 1519-1546.                                                               | Title    |
| 769 | Toyonaga, Y., et al. (1986). "[Fundamental and clinical studies on cefixime (5% granules) in the pediatric field]." Jpn J Antibiot 39(4): 1055-1075.                                                                                  | Title    |
| 770 | Trabucchi, E., Jr., et al. (1977). "[Absorption and elimination of a new cephalosporin]." Clin Ter 81(4): 299-307.                                                                                                                    | Title    |
| 771 | Trachtman, H., et al. (2008). "Pilot Study of Mycophenolate Mofetil for Treatment of Kidney Disease due to Congenital Urinary Tract Disorders in Children." American Journal of Kidney Diseases 52(4): 706-715.                       | Title    |



|     |                                                                                                                                                                                                                                         |        |
|-----|-----------------------------------------------------------------------------------------------------------------------------------------------------------------------------------------------------------------------------------------|--------|
| 772 | Tschanz, C., et al. (1996). Interactions Between Drugs and Nutrients. Advances in Pharmacology. J. T. August, M. W. Anders, F. Murad and J. T. Coyle, Academic Press. 35: 1-26.                                                         | Title  |
| 773 | Tsui, K., et al. (2016). "Sequential intravenous high dose oral antibiotics in the treatment of osteoarticular infections in children: a randomized controlled trial." Open forum infectious diseases 3.                                | Title  |
| 774 | Tsuji, A., et al. (1983). "Physiologically based pharmacokinetic model for $\beta$ -lactam antibiotics I: Tissue distribution and elimination in rats." J Pharm Sci 72(11): 1239-1252.                                                  | Animal |
| 775 | Tucker, G. T. and M. S. Lennard (1990). "Enantiomer specific pharmacokinetics." Pharmacology & Therapeutics 45(3): 309-329.                                                                                                             | Title  |
| 776 | Turgeon, J., et al. (1989). "Improved high-performance liquid chromatographic assay for encainide and its metabolites in human body fluids." Journal of Chromatography B: Biomedical Sciences and Applications 490: 165-174.            | Title  |
| 777 | Turnidge, J. D. (2011). "Cefazolin and enterobacteriaceae: rationale for revised susceptibility testing breakpoints." Clin Infect Dis 52(7): 917-924.                                                                                   | Title  |
| 778 | Turuvekere Vittala Murthy, N., et al. (2021). "Polyphenols against infectious diseases: Controlled release nano-formulations." European Journal of Pharmaceutics and Biopharmaceutics 161: 66-79.                                       | Title  |
| 779 | Tutunji, M., et al. (2001). "Bioequivalence evaluation of two brands of cefaclor 500 mg capsules: quantification of cefaclor using solid phase extraction technique." J Clin Pharm Ther 26(2): 149-153.                                 | Title  |
| 780 | Upton, R. A. (1991). "Pharmacokinetic interactions between theophylline and other medication (Part I)." Clin Pharmacokinet 20(1): 66-80.                                                                                                | Title  |
| 781 | Ustariz-Peyret, C., et al. (1999). "Cephadrin-plaga microspheres for sustained delivery to cattle." J Microencapsul 16(2): 181-194.                                                                                                     | Animal |
| 782 | Valassis, I. N., et al. (1999). "Quantitative determination of cefepime in plasma and vitreous fluid by high-performance liquid chromatography." Journal of Chromatography B: Biomedical Sciences and Applications 721(2): 249-255.     | Title  |
| 783 | Valko, K., et al. (2003). "Fast Gradient HPLC Method to Determine Compounds Binding to Human Serum Albumin. Relationships with Octanol/Water and Immobilized Artificial Membrane Lipophilicity." J Pharm Sci 92(11): 2236-2248.         | Title  |
| 784 | van Crugten, J., et al. (1986). "Selectivity of the cimetidine-induced alterations in the renal handling of organic substrates in humans. Studies with anionic, cationic and zwitterionic drugs." J Pharmacol Exp Ther 236(2): 481-487. | Title  |
| 785 | Van Den Berg, M. P., et al. (2003). "Hydroxocobalamin uptake into the cerebrospinal fluid after nasal and intravenous delivery in rats and humans." J Drug Target 11(6): 325-331.                                                       | Title  |

|     |                                                                                                                                                                                                                                                 |        |
|-----|-------------------------------------------------------------------------------------------------------------------------------------------------------------------------------------------------------------------------------------------------|--------|
| 786 | Ved, P. M. and K. Kim (2011). "Poly(ethylene oxide/propylene oxide) copolymer thermo-reversible gelling system for the enhancement of intranasal zidovudine delivery to the brain." Int J Pharm 411(1): 1-9.                                    | Title  |
| 787 | Verhaegen, J. and L. Verbist (1992). "Oral cephalosporins." Acta Clin Belg 47(6): 377-386.                                                                                                                                                      | Title  |
| 788 | Vila Jato, J. L., et al. (1982). "[Oral bioavailability of cefadroxil: influence of food]." Arch Farmacol Toxicol 8(3): 171-178.                                                                                                                | Title  |
| 789 | Vinchurkar, K., et al. (2022). "Features and Facts of a Gastroretentive Drug Delivery System-A Review." Turkish Journal of Pharmaceutical Sciences 19(4).                                                                                       | Title  |
| 790 | Vittorini, C., et al. (1981). "Controlled assessment of the concentrations of a new cephalosporin in bile and gallbladder." Arzneimittelforschung 31(7): 1163-1165.                                                                             | Title  |
| 791 | von Hattingberg, H. M. (1975). "[Special pharmacokinetic aspects in newborns and young infants]." Monatsschr Kinderheilkd (1902) 123(1): 23-26.                                                                                                 | Title  |
| 792 | Vukovich, R. A., et al. (1975). "Sex differences in the intramuscular absorption and bioavailability of cephradine." Clin Pharmacol Ther 18(2): 215-220.                                                                                        | Title  |
| 793 | Vukovich, R. A., et al. (1975). "Effect of 2% procaine hydrochloride solution on the bioavailability of cephradine after intramuscular injection." Curr Ther Res Clin Exp 18(5): 711-719.                                                       | Title  |
| 794 | Wagner, J. G. (1974). "Relevant Pharmacokinetics of Antimicrobial Drugs." Medical Clinics of North America 58(3): 479-492.                                                                                                                      | Title  |
| 795 | Walker, J. R., et al. (2009). "Quantitative structure-property relationships modeling to predict in vitro and in vivo binding of drugs to the bile sequestrant, colesevelam (Welchol)." The Journal of Clinical Pharmacology 49(10): 1185-1195. | Title  |
| 796 | Walsh, M. L. and C. C. Johnson (1991). "Update on Antimicrobial Agents." Nursing Clinics of North America 26(2): 341-360.                                                                                                                       | Title  |
| 797 | Wang, F., et al. (2003). "Profiles of methotrexate in blood and CSF following intranasal and intravenous administration to rats." Int J Pharm 263(1): 1-7.                                                                                      | Animal |
| 798 | Wang, Q., et al. (2007). "Pharmacokinetics of Gastrodin in rat plasma and CSF after i.n. and i.v." Int J Pharm 341(1): 20-25.                                                                                                                   | Animal |
| 799 | Wang, Q., et al. (2020). "Exclusion of unsuitable CNS drug candidates based on their physicochemical properties and unbound fractions in biomatrices for brain microdialysis investigations." J Pharm Biomed Anal 178: 112946.                  | Title  |
| 800 | Watanabe, K., et al. (2004). "Effects of progesterone and norethisterone on cephalixin uptake in the human intestinal cell line Caco-2." Biol Pharm Bull 27(4): 559-563.                                                                        | Title  |

|     |                                                                                                                                                                                                                                                     |          |
|-----|-----------------------------------------------------------------------------------------------------------------------------------------------------------------------------------------------------------------------------------------------------|----------|
| 801 | Watanabe, K., et al. (2004). "Effect of insulin on cephalexin uptake and transepithelial transport in the human intestinal cell line Caco-2." <i>Eur J Pharm Sci</i> 21(1): 87-95.                                                                  | Title    |
| 802 | Watanabe, K., et al. (2003). "Intestinal absorption of cephalexin in diabetes mellitus model rats." <i>European Journal of Pharmaceutical Sciences</i> 19(2): 91-98.                                                                                | Animal   |
| 803 | Watanabe, S., et al. (2010). "Reduced renal clearance of a zwitterionic substrate cephalexin in MATE1-deficient mice." <i>Journal of Pharmacology Experimental Therapeutics</i> 334(2): 651-656.                                                    | Animal   |
| 804 | Webster, C. A., et al. (1996). "Comparative in-vitro activity of cefaclor against urinary tract isolates of <i>Escherichia coli</i> ." <i>J Antimicrob Chemother</i> 38(1): 59-66.                                                                  | Title    |
| 805 | Weese, J. S., et al. (2019). "International Society for Companion Animal Infectious Diseases (ISCAID) guidelines for the diagnosis and management of bacterial urinary tract infections in dogs and cats." <i>The Veterinary Journal</i> 247: 8-25. | Animal   |
| 806 | Welling, P. G., et al. (1979). "The pharmacokinetics of the oral cephalosporins cefaclor, cephadrine and cephalexin." <i>Int J Clin Pharmacol Biopharm</i> 17(9): 397-400.                                                                          | Abstract |
| 807 | Welling, P. G., et al. (1979). "Probenecid: an unexplained effect on cephalosporin pharmacology." <i>Br J Clin Pharmacol</i> 8(5): 491-495.                                                                                                         | Title    |
| 808 | Wenzler, E., et al. (2018). "Drug-Food Interactions." <i>Drug Interactions in Infectious Diseases: Mechanisms Models of Drug Interactions</i> : 87-162.                                                                                             | Title    |
| 809 | Whelton, A. (1982). "Antibiotic Pharmacokinetics and Clinical Application in Renal Insufficiency." <i>Medical Clinics of North America</i> 66(1): 267-281.                                                                                          | Title    |
| 810 | Wierzb, K., et al. (1984). "[Pharmacokinetics of drugs in the growing child]." <i>Pediatr Pol</i> 59(11): 955-963.                                                                                                                                  | Title    |
| 811 | Wijma, R. (2019). Pharmacokinetic Profiling of Fosfomycin and Nitrofurantoin to Optimize the Treatment of Uncomplicated Urinary Tract Infections.                                                                                                   | Title    |
| 812 | Wijma, R. A., et al. (2020). "An audit of nitrofurantoin use in three Australian hospitals." <i>Infection, Disease &amp; Health</i> 25(2): 124-129.                                                                                                 | Title    |
| 813 | Williams, J. D., et al. (1976). "Bacteriology and pharmacokinetics of the new amidino penicillin-mecillinam." <i>J Antimicrob Chemother</i> 2(1): 61-69.                                                                                            | Title    |
| 814 | Williams, K. J., et al. (1987). "Cefuroxime axetil in the treatment of uncomplicated UTI: a comparison with cefaclor and augmentin." <i>Drugs Exp Clin Res</i> 13(2): 95-99.                                                                        | Title    |
| 815 | Wilson, C. G. J. D. B. (2003). "Considerations for Orally Administered Medications." 547.                                                                                                                                                           | Title    |

|     |                                                                                                                                                                                                                                           |          |
|-----|-------------------------------------------------------------------------------------------------------------------------------------------------------------------------------------------------------------------------------------------|----------|
| 816 | Wilson, R. (1993). "Cefaclor." <i>Int J Antimicrob Agents</i> 2(3): 185-198.                                                                                                                                                              | Title    |
| 817 | Wilson, R. C., et al. (2022). "Addition of probenecid to oral $\beta$ -lactam antibiotics: a systematic review and meta-analysis." <i>J Antimicrob Chemother</i> 77(9): 2364-2372.                                                        | Title    |
| 818 | Windorfer, A. and P. Bauer (1982). "Pharmacokinetics and clinical studies with cefadroxil in paediatrics." <i>J Antimicrob Chemother</i> 10 Suppl B: 85-91.                                                                               | Title    |
| 819 | Wise, R. (1990). "The pharmacokinetics of the oral cephalosporins--a review." <i>J Antimicrob Chemother</i> 26 Suppl E: 13-20.                                                                                                            | Abstract |
| 820 | Wise, R. (1994). "Comparative microbiological activity and pharmacokinetics of cefprozil." <i>Eur J Clin Microbiol Infect Dis</i> 13(10): 839-845.                                                                                        | Title    |
| 821 | Wong, A. K., et al. (2002). "Determination of transport in the Caco-2 cell assay of compounds varying in lipophilicity using LC-MS: enhanced transport of Leu-enkephalin analogues." <i>Eur J Pharm Sci</i> 16(3): 113-118.               | Title    |
| 822 | Wortman, P. D. (1993). "Bacterial infections of the skin." <i>Current Problems in Dermatology</i> 5(6): 197-224.                                                                                                                          | Title    |
| 823 | Xerri, L., et al. (1986). "Ofloxacin: bactericidal effect in an in vitro pharmacokinetic model." <i>Chemioterapia</i> 5(2): 83-87.                                                                                                        | Title    |
| 824 | Xiao, Y. H., et al. (2004). "[Comparison of pharmacokinetics/pharmacodynamics of cefdinir, cefpodoxime proxetil and cefaclor against common bacteria of community acquired infections]." <i>Zhonghua Yi Xue Za Zhi</i> 84(22): 1867-1871. | Title    |
| 825 | Xie, B., et al. (2019). "Tenacigenin B ester derivatives from <i>Marsdenia tenacissima</i> actively inhibited CYP3A4 and enhanced in vivo antitumor activity of paclitaxel." <i>Journal of Ethnopharmacology</i> 235: 309-319.            | Title    |
| 826 | Xie, Y. (2015). Role and Relevance of PEPT1 in Intestinal Absorption and Pharmacokinetics of 5-Aminolevulinic Acid.                                                                                                                       | Title    |
| 827 | Xie, Y., et al. (2016). "Population pharmacokinetic modeling of cefadroxil renal transport in wild-type and Pept2 knockout mice." <i>Xenobiotica</i> 46(4): 342-349.                                                                      | Animal   |
| 828 | Yamada, T., et al. (2022). "Probability of target attainment of oral antimicrobials for <i>Escherichia coli</i> and <i>Klebsiella pneumoniae</i> based on Monte Carlo simulations." <i>Diagn Microbiol Infect Dis</i> 103(1): 115662.     | Title    |
| 829 | Yamamoto, S., et al. (2017). "Utility of Göttingen minipigs for prediction of human pharmacokinetic profiles after dermal drug application." <i>Pharmaceutical Research</i> 34: 2415-2424.                                                | Title    |
| 830 | Yamamoto, T., et al. (1977). "[Laboratory and clinical studies on cefatrizine (author's transl)]." <i>Jpn J Antibiot</i> 30(10): 763-769.                                                                                                 | Title    |
| 831 | Yamashita, F., et al. (2006). "Quantitative structure/activity relationship modelling of pharmacokinetic properties using genetic algorithm-combined partial least squares method." <i>J Drug Target</i> 14(7): 496-504.                  | Title    |

|     |                                                                                                                                                                                                                                              |        |
|-----|----------------------------------------------------------------------------------------------------------------------------------------------------------------------------------------------------------------------------------------------|--------|
| 832 | Yamashita, S., et al. (2000). "Optimized conditions for prediction of intestinal drug permeability using Caco-2 cells." European Journal of Pharmaceutical Sciences 10(3): 195-204.                                                          | Title  |
| 833 | Yamazaki, K. and M. Kanaoka (2004). "Computational prediction of the plasma protein-binding percent of diverse pharmaceutical compounds." J Pharm Sci 93(6): 1480-1494.                                                                      | Title  |
| 834 | Yáñez, J. A., et al. (2011). "Flip-flop pharmacokinetics–delivering a reversal of disposition: challenges and opportunities during drug development." Therapeutic delivery 2(5): 643-672.                                                    | Title  |
| 835 | Yang, B. (2012). Role of peptide transporter PEPT1 in the intestinal absorption and pharmacokinetics of the amino acid ester prodrug valacyclover, University of Michigan.                                                                   | Title  |
| 836 | Yang, B., et al. (2013). "Impact of peptide transporter 1 on the intestinal absorption and pharmacokinetics of valacyclovir after oral dose escalation in wild-type and PepT1 knockout mice." Drug metabolism disposition 41(10): 1867-1874. | Animal |
| 837 | Yang, B. and D. E. Smith (2013). "Significance of peptide transporter 1 in the intestinal permeability of valacyclovir in wild-type and PepT1 knockout mice." Drug metabolism disposition 41(3): 608-614.                                    | Animal |
| 838 | Yang, B. and D. E. Smith (2017). "In silico absorption analysis of valacyclovir in wildtype and Pept1 knockout mice following oral dose escalation." Pharm Res 34: 2349-2361.                                                                | Animal |
| 839 | Yang, L. P. and S. J. Keam (2008). "Retapamulin: a review of its use in the management of impetigo and other uncomplicated superficial skin infections." Drugs 68(6): 855-873.                                                               | Title  |
| 840 | Yang, L. P. and S. J. Keam (2008). "Spotlight on retapamulin in impetigo and other uncomplicated superficial skin infections." Am J Clin Dermatol 9(6): 411-413.                                                                             | Title  |
| 841 | Yang, Z., et al. (2005). "Microdialysis evaluation of the brain distribution of stavudine following intranasal and intravenous administration to rats." Journal of pharmaceutical sciences 94(7): 1577-1588.                                 | Animal |
| 842 | Yen, T. E., et al. (2005). "Prediction of drug absorption based on immobilized artificial membrane (IAM) chromatography separation and calculated molecular descriptors." J Pharm Biomed Anal 38(3): 472-478.                                | Title  |
| 843 | Yin, O. Q., et al. (2006). "Variability in renal clearance of substrates for renal transporters in chinese subjects." J Clin Pharmacol 46(2): 157-163.                                                                                       | Title  |
| 844 | Yost, R. L. and H. Derendorf (1985). "Rapid chromatographic determination of cefotaxime and its metabolite in biological fluids." J Chromatogr 341(1): 131-138.                                                                              | Title  |

|     |                                                                                                                                                                                                                                                        |          |
|-----|--------------------------------------------------------------------------------------------------------------------------------------------------------------------------------------------------------------------------------------------------------|----------|
| 845 | Yu, D. and L. L. Bio (2022). "Shedding Light on Amoxicillin, Amoxicillin-clavulanate, and Cephalexin Dosing in Children from a Pharmacist's Perspective." J Pediatric Infect Dis Soc 11(12): 594-602.                                                  | Abstract |
| 846 | Yu, L. X. and G. L. Amidon (1998). "Saturable small intestinal drug absorption in humans: modeling and interpretation of cefatrizine data." Eur J Pharm Biopharm 45(2): 199-203.                                                                       | Title    |
| 847 | Yuan, Z., et al. (1995). "Sensitive assay for measuring amoxicillin in human plasma and middle ear fluid using solid-phase extraction and reversed-phase high-performance liquid chromatography." J Chromatogr B Biomed Appl 674(1): 93-99.            | Title    |
| 848 | Zaharenko, L. (2015). Perorāla antidiabētiska medikamenta metformīna efektivitātes un panesamības farmakoģenētika.                                                                                                                                     | Language |
| 849 | Zaharenko, L. (2015). "Pharmacogenetics of efficiency and tolerance of the peroral antidiabetic drug metformin." Riga: University of Latvia.                                                                                                           | Title    |
| 850 | Zhang, E. Y., et al. (2002). "Modeling of active transport systems." Advanced Drug Delivery Reviews 54(3): 329-354.                                                                                                                                    | Title    |
| 851 | Zhang, J., et al. (2010). "Pharmacokinetic interaction between JBP485 and cephalexin in rats." Drug Metab Dispos 38(6): 930-938.                                                                                                                       | Animal   |
| 852 | Zhang, M., et al. (2018). "Simultaneous Determination of Cefalexin, Cefazolin, Flucloxacillin, and Probenecid by Liquid Chromatography-Tandem Mass Spectrometry for Total and Unbound Concentrations in Human Plasma." Ther Drug Monit 40(6): 682-692. | Abstract |
| 853 | Zhang, S., et al. (2019). "Evaluating the bioequivalence of metronidazole tablets and analyzing the effect of in vitro dissolution on in vivo absorption based on PBPK modeling." Drug Development sIndustrial Pharmacy 45(10): 1646-1653.             | Title    |
| 854 | Zhang, Z., et al. (2013). "Intestinal mucosal permeability of children with cefaclor-associated serum sickness-like reactions." Eur J Pediatr 172(4): 537-543.                                                                                         | Title    |
| 855 | Zhao, M., et al. (2016). "Animal models in the pharmacokinetic/pharmacodynamic evaluation of antimicrobial agents." Bioorg Med Chem 24(24): 6390-6400.                                                                                                 | Animal   |
| 856 | Zhao, X. L. and S. Deng (1995). "Pharmacokinetic studies of long acting cephalexin granules." The chinese journal of clinical pharmacology 11(1): 16-19.                                                                                               | Abstract |
| 857 | Zhu, L. (2006). Intestinal barriers to oral bioavailability: Saquinavir as a model compound, University of Illinois at Chicago, Health Sciences Center.                                                                                                | Title    |
| 858 | Zhu, Q., et al. (2014). "Drug interaction studies reveal that simotinib upregulates intestinal absorption by increasing the paracellular permeability of intestinal epithelial cells." Drug Metab Pharmacokinet 29(4): 317-324.                        | Title    |

|     |                                                                                                                                                             |          |
|-----|-------------------------------------------------------------------------------------------------------------------------------------------------------------|----------|
| 859 | Zuckerman, J. M. and K. M. Kaye (1995). "THE NEWER MACROLIDES: Azithromycin and Clarithromycin." Infectious Disease Clinics of North America 9(3): 731-745. | Title    |
| 860 | 梁骏, et al. (2017). 头孢拉定在糖尿病和正常大鼠体内药动学比较. 36: 256-261.                                                                                                       | Language |

**Supplementary Table S2: Quality assessment of included articles by Jadad scoring**

|                | <b>JADAD Questions</b> |                                               |                                                                                                 |                                                 |                                                                     |                                                             |                    |
|----------------|------------------------|-----------------------------------------------|-------------------------------------------------------------------------------------------------|-------------------------------------------------|---------------------------------------------------------------------|-------------------------------------------------------------|--------------------|
| <b>Sr. No.</b> | <b>Reference</b>       | <b>Was the study described as randomized?</b> | <b>Was the method used to generate the sequence of randomization described and appropriate?</b> | <b>Was the study described as double blind?</b> | <b>Was the method of double blinding described and appropriate?</b> | <b>Was there a description of withdrawals and dropouts?</b> | <b>JADAD score</b> |
| 1-             | Liew et. al            | 1                                             | 1                                                                                               | 0                                               | 0                                                                   | 1                                                           | 3                  |
| 2-             | Liu R et. al           | 1                                             | 1                                                                                               | 0                                               | 0                                                                   | 1                                                           | 3                  |
| 3-             | Hassanzadeh et. al     | 1                                             | 1                                                                                               | 1                                               | 1                                                                   | 0                                                           | 4                  |
| 4-             | Bataineh et. al        | 1                                             | 1                                                                                               | 0                                               | 0                                                                   | 0                                                           | 2                  |
| 5-             | Ding et. al            | 1                                             | 1                                                                                               | 0                                               | 0                                                                   | 0                                                           | 2                  |
| 6-             | Lecaillom et. al       | 0                                             | 0                                                                                               | 0                                               | 0                                                                   | 0                                                           | 0                  |
| 7-             | Ginsburg et. al        | 1                                             | 0                                                                                               | 0                                               | 0                                                                   | 0                                                           | 1                  |
| 8-             | Spyker et. al          | 0                                             | 0                                                                                               | 0                                               | 0                                                                   | 0                                                           | 0                  |
| 9-             | Nakagawa et. al        | 0                                             | 0                                                                                               | 0                                               | 0                                                                   | 0                                                           | 0                  |
| 10-            | Nahata et. al          | 0                                             | 0                                                                                               | 0                                               | 0                                                                   | 0                                                           | 0                  |
| 11-            | Lode et. al            | 1                                             | 1                                                                                               | 0                                               | 0                                                                   | 0                                                           | 2                  |
| 12-            | Evert et. al           | 1                                             | 1                                                                                               | 0                                               | 0                                                                   | 0                                                           | 2                  |
| 13-            | Kelly et. al           | 1                                             | 1                                                                                               | 0                                               | 0                                                                   | 0                                                           | 2                  |
| 14-            | Akimoto et. al         | 0                                             | 0                                                                                               | 0                                               | 0                                                                   | 0                                                           | 0                  |
| 15-            | Barbhayia et. al       | 1                                             | 1                                                                                               | 0                                               | 0                                                                   | 0                                                           | 2                  |
| 16-            | Finkelstein et. al     | 1                                             | 1                                                                                               | 0                                               | 0                                                                   | 0                                                           | 2                  |
| 17-            | Ding Y et. al          | 1                                             | 1                                                                                               | 0                                               | 0                                                                   | 0                                                           | 2                  |



|     |                    |   |   |   |   |   |   |
|-----|--------------------|---|---|---|---|---|---|
| 18- | Mohamed S et. al   | 1 | 1 | 0 | 0 | 0 | 2 |
| 19- | Welling et. al     | 1 | 1 | 0 | 0 | 0 | 2 |
| 20- | Bunke et. al       | 1 | 1 | 0 | 0 | 0 | 2 |
| 21- | Liu R et. al       | 1 | 1 | 0 | 0 | 0 | 2 |
| 22- | Regamey et. al     | 0 | 0 | 0 | 0 | 0 | 0 |
| 23- | Autmizguine et. Al | 1 | 1 | 0 | 0 | 0 | 2 |

**Supplementary Table S3: Quality assessment of included articles by CACPK scoring**

|           | References |         |         |         |   |         |         |         |   |    |    |         |    |         |         |    |                   |    |         |    |    |         |         |
|-----------|------------|---------|---------|---------|---|---------|---------|---------|---|----|----|---------|----|---------|---------|----|-------------------|----|---------|----|----|---------|---------|
| Questions | 1          | 2       | 3       | 4       | 5 | 6       | 7       | 8       | 9 | 10 | 11 | 12      | 13 | 14      | 15      | 16 | 17                | 18 | 19      | 20 | 21 | 22      | 23      |
| Q1        | Y          | Y       | Y       | Y       | Y | Y       | Y       | Y       | Y | Y  | Y  | Y       | Y  | Y       | Y       | Y  | Y                 | Y  | Y       | Y  | Y  | Y       | Y       |
| Q2        | Y          | Y       | Y       | Y       | Y | Y       | Y       | Y       | Y | Y  | Y  | Y       | Y  | Y       | Y       | Y  | Y                 | Y  | Y       | Y  | Y  | Y       | Y       |
| Q3        | Y          | Y       | Y       | Y       | Y | N       | Y       | N       | Y | N  | Y  | Y       | Y  | N       | Y       | N  | Y                 | Y  | Y       | Y  | Y  | N       | N       |
| Q4        | Y          | Y       | Y       | Y       | Y | Y       | Y       | Y       | Y | Y  | Y  | Y       | Y  | Y       | Y       | Y  | Y                 | Y  | Y       | Y  | Y  | Y       | Y       |
| Q5        | Y          | Y       | Y       | Y       | Y | Y       | Y       | Y       | Y | Y  | Y  | Y       | Y  | Y       | Y       | Y  | <a href="#">Y</a> | Y  | Y       | Y  | Y  | Y       | Y       |
| Q6        | Y          | Y       | N       | N       | Y | Y       | Y       | Y       | N | Y  | Y  | Y       | Y  | N       | Y       | Y  | Y                 | Y  | N       | N  | Y  | N       | N       |
| Q7        | Y          | N       | Y       | Y       | Y | Y       | Y       | Y       | Y | Y  | Y  | Y       | Y  | Y       | Y       | Y  | Y                 | Y  | Y       | Y  | Y  | Y       | Y       |
| Q8        | Y          | Y       | ID<br>K | N       | Y | N       | ID<br>K | ID<br>K | N | Y  | Y  | N       | Y  | N       | N       | N  | Y                 | Y  | ID<br>K | Y  | Y  | ID<br>K | ID<br>K |
| Q9        | Y          | Y       | Y       | Y       | Y | Y       | Y       | Y       | Y | Y  | Y  | Y       | Y  | Y       | Y       | Y  | Y                 | Y  | Y       | Y  | Y  | Y       | Y       |
| Q10       | Y          | Y       | Y       | Y       | Y | Y       | Y       | Y       | Y | Y  | Y  | Y       | Y  | Y       | Y       | Y  | Y                 | Y  | Y       | Y  | Y  | Y       | Y       |
| Q11       | Y          | Y       | Y       | Y       | Y | Y       | Y       | Y       | Y | Y  | Y  | Y       | Y  | Y       | Y       | Y  | Y                 | Y  | Y       | Y  | Y  | Y       | Y       |
| Q12       | Y          | ID<br>K | ID<br>K | ID<br>K | N | N       | ID<br>K | N       | N | N  | N  | ID<br>K | N  | ID<br>K | ID<br>K | N  | N                 | N  | N       | N  | N  | N       | N       |
| Q13       | Y          | Y       | Y       | Y       | Y | Y       | N       | Y       | N | Y  | Y  | Y       | Y  | Y       | Y       | Y  | Y                 | Y  | Y       | Y  | Y  | Y       | Y       |
| Q14       | Y          | Y       | ID<br>K | N       | Y | N       | N       | N       | N | N  | Y  | Y       | Y  | N       | N       | N  | N                 | N  | N       | Y  | Y  | N       | N       |
| Q15       | Y          | Y       | ID<br>K | N       | Y | ID<br>K | N       | N       | N | N  | Y  | Y       | Y  | N       | N       | N  | Y                 | N  | N       | Y  | Y  | N       | N       |
| Q16       | Y          | Y       | Y       | Y       | Y | Y       | Y       | Y       | Y | Y  | Y  | Y       | Y  | Y       | Y       | Y  | Y                 | Y  | Y       | Y  | Y  | Y       | Y       |
| Q17       | N          | N       | N       | N       | N | N       | N       | N       | N | Y  | Y  | Y       | N  | N       | N       | N  | N                 | N  | Y       | Y  | N  | Y       | Y       |

|                         |         |         |         |         |         |         |         |         |         |         |    |    |         |         |    |         |    |    |    |    |         |    |         |
|-------------------------|---------|---------|---------|---------|---------|---------|---------|---------|---------|---------|----|----|---------|---------|----|---------|----|----|----|----|---------|----|---------|
| Q18                     | Y       | Y       | Y       | Y       | Y       | Y       | Y       | Y       | N       | N       | Y  | Y  | Y       | ID<br>K | Y  | N       | Y  | Y  | Y  | Y  | Y       | N  | Y       |
| Q19                     | Y       | Y       | Y       | Y       | Y       | Y       | Y       | Y       | ID<br>K | Y       | Y  | Y  | ID<br>K | Y       | Y  | ID<br>K | Y  | Y  | Y  | Y  | Y       | Y  | Y       |
| Q20                     | ID<br>K | N  | N  | N       | N       | N  | N       | N  | N  | N  | N  | ID<br>K | N  | ID<br>K |
| Q21                     | Y       | Y       | Y       | Y       | Y       | Y       | Y       | Y       | N       | N       | Y  | Y  | Y       | ID<br>K | Y  | N       | Y  | Y  | Y  | Y  | Y       | N  | Y       |
| <b>DELPHI<br/>Score</b> | 19      | 17      | 14      | 14      | 18      | 14      | 14      | 14      | 10      | 14      | 19 | 18 | 17      | 11      | 15 | 11      | 17 | 16 | 15 | 18 | 18      | 12 | 14      |

Y:Yes, N:No, IDK: I don't know

**Supplementary Table S4: Quality assessment of included articles by CASP scoring**

| Reference          | Was there a clear statement of the aims of the research? | Is a qualitative methodology appropriate? | Was the research design appropriate to address the aims of the research? | Are the study's theoretical underpinnings clear, consistent and conceptually coherent? | Was the recruitment strategy appropriate to the aims of the search? | Was the data collected in a way that addressed the research issue? | Has the relationship between researcher and participants been adequately considered? | Have ethical issues been taken into consideration? | Was the data analysis sufficiently rigorous? | Is there a clear statement of findings? | CASP Score |
|--------------------|----------------------------------------------------------|-------------------------------------------|--------------------------------------------------------------------------|----------------------------------------------------------------------------------------|---------------------------------------------------------------------|--------------------------------------------------------------------|--------------------------------------------------------------------------------------|----------------------------------------------------|----------------------------------------------|-----------------------------------------|------------|
| Liew et. al        | Y                                                        | Y                                         | Y                                                                        | Y                                                                                      | Y                                                                   | Y                                                                  | Y                                                                                    | Y                                                  | Y                                            | Y                                       | 10         |
| Liu R et. al       | Y                                                        | Y                                         | Y                                                                        | Y                                                                                      | Y                                                                   | Y                                                                  | Y                                                                                    | Y                                                  | Y                                            | Y                                       | 10         |
| Hassanzadeh et. al | Y                                                        | Y                                         | Y                                                                        | Y                                                                                      | Y                                                                   | Y                                                                  | Y                                                                                    | Y                                                  | Y                                            | Y                                       | 10         |
| Bataineh et. al    | Y                                                        | Y                                         | Y                                                                        | Y                                                                                      | Y                                                                   | Y                                                                  | CT                                                                                   | Y                                                  | Y                                            | Y                                       | 9          |
| Ding et. al        | Y                                                        | Y                                         | Y                                                                        | Y                                                                                      | Y                                                                   | Y                                                                  | CT                                                                                   | Y                                                  | Y                                            | Y                                       | 9          |
| Lecaillom et. al   | Y                                                        | N                                         | N                                                                        | Y                                                                                      | Y                                                                   | Y                                                                  | CT                                                                                   | N                                                  | Y                                            | Y                                       | 6          |
| Ginsburg et. al    | Y                                                        | N                                         | N                                                                        | Y                                                                                      | Y                                                                   | Y                                                                  | N                                                                                    | Y                                                  | Y                                            | Y                                       | 7          |
| Spyker et. al      | Y                                                        | N                                         | N                                                                        | Y                                                                                      | Y                                                                   | Y                                                                  | N                                                                                    | Y                                                  | Y                                            | Y                                       | 7          |
| Nakagawa et. al    | Y                                                        | N                                         | N                                                                        | Y                                                                                      | N                                                                   | Y                                                                  | CT                                                                                   | N                                                  | Y                                            | Y                                       | 5          |

|                    |   |    |    |   |   |   |    |    |   |   |    |
|--------------------|---|----|----|---|---|---|----|----|---|---|----|
| Nahata et. al      | Y | N  | N  | Y | Y | Y | N  | Y  | Y | Y | 7  |
| Lode et. al        | Y | Y  | Y  | Y | Y | Y | CT | Y  | Y | Y | 9  |
| Evert et. al       | Y | Y  | Y  | Y | Y | Y | N  | N  | Y | Y | 8  |
| Kelly et. al       | Y | Y  | Y  | Y | Y | Y | CT | Y  | Y | Y | 9  |
| Akimoto et. al     | Y | CT | CT | Y | Y | Y | CT | N  | Y | Y | 6  |
| Barbhayia et. al   | Y | Y  | Y  | Y | Y | Y | CT | Y  | Y | Y | 9  |
| Finkelstein et. al | Y | Y  | Y  | Y | Y | Y | N  | N  | Y | Y | 8  |
| Ding Y et. al      | Y | Y  | Y  | Y | Y | Y | Y  | Y  | Y | Y | 10 |
| Mohamed S et. al   | Y | Y  | Y  | Y | Y | Y | CT | Y  | Y | Y | 9  |
| Welling et. al     | Y | Y  | Y  | Y | Y | Y | CT | Y  | Y | Y | 9  |
| Bunke et. al       | Y | Y  | Y  | Y | Y | Y | N  | N  | Y | Y | 8  |
| Liu R et. al       | Y | Y  | Y  | Y | Y | Y | Y  | Y  | Y | Y | 10 |
| Regamey et. al     | Y | CT | CT | Y | Y | Y | CT | CT | Y | Y | 6  |
| Autmizguine et. Al | Y | Y  | N  | Y | Y | Y | N  | Y  | Y | Y | 8  |

Y:Yes, N:No, CT: Can't tell

**Supplementary Table S5: Risk of bias assessment of included articles by Cochrane Collaboration tool**

|     | Reference          | Random<br>sequence<br>Generation<br>(selection<br>bias) | Allocaton<br>concealment<br>(selection<br>bias) | Blinding of<br>participant and<br>researchers<br>(performed<br>bias) | Blinding of<br>outcome<br>assessment<br>(detection<br>bias) | Incomplete<br>outcome<br>data<br>(attrition<br>bias) | Selective<br>reporting<br>(reporting<br>bias) | Other<br>bias | Bias<br>Score |
|-----|--------------------|---------------------------------------------------------|-------------------------------------------------|----------------------------------------------------------------------|-------------------------------------------------------------|------------------------------------------------------|-----------------------------------------------|---------------|---------------|
| 1-  | Liew et. al        | LR                                                      | LR                                              | HR                                                                   | UR                                                          | LR                                                   | LR                                            | LR            | 5             |
| 2-  | Liu R et. al       | LR                                                      | LR                                              | UR                                                                   | UR                                                          | LR                                                   | LR                                            | LR            | 5             |
| 3-  | Hassanzadeh et. al | LR                                                      | LR                                              | LR                                                                   | LR                                                          | LR                                                   | LR                                            | LR            | 7             |
| 4-  | Bataineh et. al    | LR                                                      | LR                                              | HR                                                                   | UR                                                          | UR                                                   | LR                                            | LR            | 4             |
| 5-  | Ding et. al        | LR                                                      | LR                                              | HR                                                                   | UR                                                          | UR                                                   | LR                                            | LR            | 4             |
| 6-  | Lecaillom et. al   | HR                                                      | HR                                              | HR                                                                   | UR                                                          | LR                                                   | LR                                            | LR            | 3             |
| 7-  | Ginsburg et. al    | LR                                                      | LR                                              | HR                                                                   | HR                                                          | UR                                                   | LR                                            | LR            | 4             |
| 8-  | Spyker et. al      | HR                                                      | HR                                              | HR                                                                   | UR                                                          | LR                                                   | LR                                            | LR            | 3             |
| 9-  | Nakagawa et. al    | HR                                                      | HR                                              | HR                                                                   | UR                                                          | LR                                                   | LR                                            | LR            | 3             |
| 10- | Nahata et. al      | HR                                                      | HR                                              | HR                                                                   | UR                                                          | LR                                                   | LR                                            | LR            | 3             |
| 11- | Lode et. al        | LR                                                      | LR                                              | HR                                                                   | UR                                                          | LR                                                   | LR                                            | LR            | 5             |
| 12- | Evert et. al       | LR                                                      | LR                                              | HR                                                                   | HR                                                          | UR                                                   | LR                                            | LR            | 4             |
| 13- | Kelly et. al       | LR                                                      | LR                                              | HR                                                                   | HR                                                          | UR                                                   | LR                                            | LR            | 4             |
| 14- | Akimoto et. al     | HR                                                      | HR                                              | HR                                                                   | UR                                                          | LR                                                   | LR                                            | LR            | 3             |
| 15- | Barbhayia et. al   | LR                                                      | LR                                              | HR                                                                   | UR                                                          | LR                                                   | LR                                            | LR            | 5             |
| 16- | Finkelstein et. al | HR                                                      | HR                                              | HR                                                                   | UR                                                          | LR                                                   | LR                                            | LR            | 3             |
| 17- | Ding Y et. al      | LR                                                      | LR                                              | HR                                                                   | UR                                                          | LR                                                   | LR                                            | LR            | 5             |
| 18- | Mohamed S et. al   | LR                                                      | LR                                              | HR                                                                   | UR                                                          | UR                                                   | LR                                            | LR            | 4             |
| 19- | Welling et. al     | LR                                                      | LR                                              | HR                                                                   | HR                                                          | UR                                                   | LR                                            | LR            | 4             |

|     |                    |    |    |    |    |    |    |    |   |
|-----|--------------------|----|----|----|----|----|----|----|---|
| 20- | Bunke et. al       | HR | HR | HR | UR | LR | LR | LR | 3 |
| 21- | Liu R et. al       | HR | HR | HR | UR | LR | LR | LR | 3 |
| 22- | Regamey et. al     | HR | HR | HR | UR | LR | LR | LR | 3 |
| 23- | Autmizguine et. Al | LR | LR | HR | HR | UR | LR | LR | 4 |

LR: Low risk, HR: High risk, UR: Unclear risk
